# Supplementary material for: Antifungal Activity of Fused Mannich Ketones Triggers an Oxidative Stress Response and Is Cap1-Dependent in Candida albicans
Source: PLoS One. 2013 Apr 30;8(4):e62142. doi: 10.1371/journal.pone.0062142 (PMC3639977; doi:10.1371/journal.pone.0062142)
Supplement: Table S1 — Microarray Gene expression data. Normalized expression data for all ORFs with fold change ratios and p-values at 30 min and 60 min as described in materials and methods section. (XLS) [file pone.0062142.s001.xls]

## Sheet: All_results
Systematic Name	Ratio 30 min	30 min t-test p-value	Ratio 60 min	60 min t-test p-value	name	description
orf19.10	0.988	0.941	0.663	0.337	ALK8	Alkane-inducible cytochrome P450; catalyzes hydroxylation of lauric acid to hydroxylauric acid; overproduction causes fluconazole resistance in a wild-type background and causes multidrug resistance in a cdr1 cdr2 double mutant background
orf19.100	1.095	0.639	0.838	0.126	0	Hap43p-repressed gene; late-stage biofilm-induced
orf19.1002	0.805	0.0619	0.749	0.0196	0	Hap43p-repressed gene
orf19.1003	NO DATA	NO DATA	0.01*	no replicates	#N/A	#N/A
orf19.1004	0.751	no replicates	0.649	no replicates	#N/A	#N/A
orf19.1005	1.132	0.853	1.346	0.102	0	Predicted ORF in Assemblies 19, 20 and 21; transcription is upregulated in both intermediate and mature biofilms
orf19.1006	1.553	no replicates	NO DATA	NO DATA	#N/A	#N/A
orf19.1007	0.804	0.0537	0.947	0.369	0	Putative transcription factor with bZIP DNA-binding motif
orf19.1008	1.037	0.792	1.575	no replicates	0	0
orf19.1009	0.699	0.0577	1.273	0.434	0	0
orf19.101	0.952	0.625	1.033	0.68	RIM9	Protein required for alkaline pH response via the RIM101 signaling pathway; ortholog of S. cerevisiae RIM9 and A. nidulans palI
orf19.1010	1.031	0.759	0.988	0.868	MNT3	Mannosyltransferase; transcription elevated in cyr1, chk1, nik1, and sln1 homozygous null mutants; fungal-specific (no human or murine homolog)
orf19.1011	1.319	0.0939	1.039	0.591	0	S. cerevisiae ortholog Mnn2p has alpha-1,2-mannosyltransferase activity, has role in protein glycosylation and localizes to Golgi apparatus
orf19.1012	0.897	0.171	1.04	0.475	0	S. cerevisiae ortholog Aps1p has clathrin binding, has role in Golgi to vacuole transport and localizes to AP-1 adaptor complex
orf19.1013	0.677	no replicates	0.89	no replicates	#N/A	#N/A
orf19.1014	1.06	no replicates	0.936	no replicates	#N/A	#N/A
orf19.1016	0.657	no replicates	1.124	no replicates	#N/A	#N/A
orf19.1017	1.387	no replicates	2.246	no replicates	#N/A	#N/A
orf19.1018	1.11	no replicates	1.322	no replicates	#N/A	#N/A
orf19.1019	1.088	no replicates	1.048	no replicates	#N/A	#N/A
orf19.102	0.909	0.289	1.015	0.787	0	0
orf19.1020	1.406	no replicates	1.136	no replicates	#N/A	#N/A
orf19.1021	0.989	no replicates	1.004	no replicates	#N/A	#N/A
orf19.1022	1.18	no replicates	0.957	no replicates	#N/A	#N/A
orf19.1023	0.01*	no replicates	NO DATA	NO DATA	#N/A	#N/A
orf19.1024	2.98	no replicates	0.595	no replicates	#N/A	#N/A
orf19.1025	0.974	no replicates	0.589	no replicates	#N/A	#N/A
orf19.1026	0.844	0.174	1.013	0.745	0	Ortholog of S. cerevisiae Csl4p
orf19.1026.1	NO DATA	NO DATA	NO DATA	NO DATA	0	0
orf19.1027	2.456	0.0471	2.278	2.58e-05	PDR16	Phosphatidylinositol transfer protein; increased transcription correlates with CDR1 and CDR2 overexpression and azole resistance; induced by fluphenazine, 17-beta-estradiol, ethynyl estradiol, nitric oxide; farnesol-downregulated in biofilm
orf19.1028	1.003	0.974	0.97	0.662	0	S. cerevisiae ortholog Ela1p has role in protein ubiquitination involved in ubiquitin-dependent protein catabolic process and localizes to Cul3-RING ubiquitin ligase complex
orf19.1029	0.876	0.583	1.074	0.288	0	S. cerevisiae ortholog Rpp1p has ribonuclease MRP activity, ribonuclease P activity and has role in intronic box C/D snoRNA processing, mRNA cleavage, rRNA processing, tRNA processing
orf19.103	0.909	0.402	0.965	0.807	KAR5	Protein similar to S. cerevisiae Kar5p, involved in nuclear membrane fusion during karyogamy; induced by alpha factor
orf19.1030	0.712	0.0135	1.168	0.0751	0	Putative peptidyl-prolyl cis-trans isomerase
orf19.1031	1.008	0.936	0.936	0.227	HMG1	HMG-CoA reductase; enzyme of sterol pathway; inhibited by lovastatin; gene not transcriptionally regulated in response to lovastatin and fluconazole
orf19.1032	1.162	0.239	0.872	0.0719	SKO1	bZIP domain transcription factor involved in cell wall damage response; represses the yeast-to-hypha transition; mutants are caspofungin sensitive; induced by osmotic stress via Hog1p; induced by Mnl1p under weak acid stress
orf19.1033	0.829	0.109	0.953	0.402	STR2	S. cerevisiae ortholog Str2p has cystathionine gamma-synthase activity, has role in transsulfuration and localizes to nucleus, cytoplasm
orf19.1034	1.185	0.0977	1.079	0.203	0	Hap43p-repressed gene; caspofungin repressed; biofilm- and planktonic growth-induced gene
orf19.1035	0.783	0.0429	1.036	0.672	WAR1	Predicted zinc cluster protein involved in resistance to weak organic acids; has similarity to S. cerevisiae War1p, which is a transcription factor involved in the regulation of weak acid stress response genes
orf19.1036	1.139	0.106	0.874	0.0193	MNS1	Alpha-1,2-mannosidase; processes Man9GlcNAc2 to Man8GlcNAc2 isomer B; member of endoplasmic-reticulum localized glycosyl hydrolase family 47; ER form is converted by Kex2p to a cytosolic form
orf19.1037	1.411	0.0153	0.827	0.165	0	0
orf19.1038	1.528	no replicates	0.944	no replicates	#N/A	#N/A
orf19.1039	0.98	0.804	1.218	0.0245	0	S. cerevisiae ortholog Bet4p has Rab geranylgeranyltransferase activity and has role in protein targeting to membrane, protein geranylgeranylation, ER to Golgi vesicle-mediated transport
orf19.104	1.12	0.156	0.979	0.857	0	Predicted ORF in Assemblies 19, 20 and 21; transcription is induced in response to alpha pheromone in SpiderM medium
orf19.1040	1.011	0.898	1.217	0.0188	MAD2	Protein required for the spindle assembly checkpoint of the cell cycle; necessary for survival in host cell macrophages and for virulence in a mouse model of systemic candidiasis
orf19.1041	0.974	0.814	0.927	0.333	0	Ortholog of S. cerevisiae Ctk2p
orf19.1042	0.942	0.404	0.761	0.0277	POR1	Mitochondrial outer membrane porin; in detergent-resistant membrane fraction (possible lipid raft component); antigenic in human, mouse; Hap43p-induced; flucytosine-, macrophage-, farnesol- induced; fluconazole, caspofungin repressed
orf19.1043	0.903	0.319	1.027	0.719	0	S. cerevisiae ortholog Vps66p has role in protein targeting to vacuole and localizes to cytoplasm
orf19.1045	0.835	0.171	1.279	0.00873	0	Putative U2 snRNP protein; Hap43p-induced gene; mutation confers hypersensitivity to 5-fluorocytosine (5-FC), 5-fluorouracil (5-FU), and tubercidin (7-deazaadenosine)
orf19.1047	0.901	0.573	1.07	0.213	ERB1	Protein with a predicted role in ribosomal large subunit biogenesis; mutation confers hypersensitivity to 5-fluorocytosine (5-FC), 5-fluorouracil (5-FU), and tubercidin (7-deazaadenosine); hyphal repressed; macrophage repressed
orf19.1048	3.835	0.00752	2.548	0.0173	IFD6	Aldo-keto reductase family member; similar to aryl alcohol dehydrogenases; increased protein correlates with MDR1 overexpression (but not CDR1 or CDR2) in fluconazole-resistant clinical isolates; farnesol regulated; possibly essential gene
orf19.1049	1.038	0.619	1.02	0.758	0	Hap43p-induced gene; expression upregulated during planktonic growth
orf19.105	0.968	0.819	0.81	0.00422	HAL22	Putative phosphoadenosine-5'-phosphate (PAP) or 3'-phosphoadenosine 5'-phosphosulfate (PAPS) phosphatase; possible role in sulfur recycling; induced upon biofilm formation; Hap43p-repressed gene
orf19.1050	1.078	0.425	0.98	0.738	0	Ortholog of C. glabrata Cagl0j01397gp
orf19.1051	0.973	0.747	1.203	0.00763	HTA2	Putative histone H2A; farnesol regulated; transcription is downregulated in both intermediate and mature biofilms; Hap43p-induced
orf19.1052	0.819	no replicates	1.139	no replicates	0	Predicted histone H2B; Hap43p-induced gene
orf19.1053	1.053	0.498	0.893	0.193	0	0
orf19.1054	1.327	0.0184	0.995	0.937	0	Ortholog of C. glabrata Cagl0g03773gp
orf19.1055	0.977	0.718	0.939	0.117	CDC3	Septin; essential for viability; functional homolog of S. cerevisiae Cdc3p; down-regulation associated with azole resistance; macrophage/pseudohyphal-repressed; virulence-group-correlated expression; gene has intron
orf19.1057	1.081	0.466	0.989	0.87	0	0
orf19.1058	1.122	0.228	0.905	0.307	0	0
orf19.1059	0.881	no replicates	1.149	no replicates	HHF1	Putative histone H4; reduced mRNA in homozygous fkh2 null mutant; regulated by Efg1p; fluconazole induced; amphotericin B repressed; farnesol regulated; shows colony morphology-related gene regulation by Ssn6p; Hap43p-induced gene
orf19.1060	1.077	0.643	1.01	0.903	0	0
orf19.1061	1.004	no replicates	1.081	no replicates	HHT21	Putative histone H3; amphotericin B repressed; regulated by Efg1p; farnesol regulated; Hap43p-induced
orf19.1062	1.044	0.63	1	0.999	0	0
orf19.1063	0.954	0.514	0.904	0.21	0	S. cerevisiae ortholog Gpi18p has dolichyl-phosphate-mannose-glycolipid alpha-mannosyltransferase activity and has role in GPI anchor biosynthetic process
orf19.1064	0.89	0.0976	0.846	0.0305	ACS2	Acetyl-CoA synthetase; antigenic during human and murine infection; upregulated by Efg1p; macrophage-induced protein; soluble protein in hyphae; gene contains an intron
orf19.1065	1.706	0.0192	0.623	2.69e-05	SSA2	HSP70 family chaperone; found in cell wall fractions; antigenic; role in import of beta-defensin peptides; ATPase domain binds histatin 5; at surface of hyphae, not yeast-form cells; farnesol-downregulated in biofilm; caspofungin repressed
orf19.1066	0.851	0.286	1.042	0.845	GIG1	Protein induced by N-acetylglucosamine (GlcNAc); localized in cytoplasm; mutation causes increased resistance to nikkomycin Z
orf19.1067	1.047	0.586	1.006	0.919	GPM2	Putative phosphoglycerate mutase; decreased expression in hyphae compared to yeast-form cells; macrophage/pseudohyphal-repressed; induced by high levels of peroxide stress, farnesol-induced; biofilm- and planktonic growth-induced gene
orf19.1068	0.449	no replicates	1.08	no replicates	#N/A	#N/A
orf19.1069	1.291	0.0483	0.993	0.883	RPN4	DNA binding protein with Cys2-His2 zinc-finger; putative regulator of proteasome genes; DNA recognition sequence (GAAGGCAAAA) enriched in regions upstream of proteasome genes; induced in core stress response; Hap43p-induced gene
orf19.107	0.742	0.0452	1.103	0.288	0	S. cerevisiae ortholog Dhr2p has RNA helicase activity, has role in maturation of SSU-rRNA from tricistronic rRNA transcript (SSU-rRNA, 5.8S rRNA, LSU-rRNA) and localizes to nucleolus
orf19.1070	0.916	0.205	0.923	0.268	0	S. cerevisiae ortholog Ymr010wp localizes to cytoplasm
orf19.1071	0.744	no replicates	1.587	no replicates	#N/A	#N/A
orf19.10711	NO DATA	NO DATA	NO DATA	NO DATA	PIKALPHA	Putative phosphatidylinositol kinase; gene is located within the MTLalpha mating-type-like locus
orf19.10712	NO DATA	NO DATA	NO DATA	NO DATA	MTLALPHA1	Master regulator (activator) of alpha mating type; gene of the MTLalpha (Mating Type Like) locus; ortholog of S. cerevisiae Alpha1p; a/alpha mating type may increase virulence, offers competitive advantage
orf19.10713	NO DATA	NO DATA	NO DATA	NO DATA	PAPALPHA	Putative poly(A) polymerase; PAP is inhibited by parnafungin antifungals; gene is located within the MTLalpha mating-type-like locus
orf19.1072	0.151	no replicates	0.359	no replicates	#N/A	#N/A
orf19.1073	0.247	no replicates	0.367	no replicates	#N/A	#N/A
orf19.1074	0.475	no replicates	1.611	no replicates	#N/A	#N/A
orf19.1075	0.858	0.0329	1.017	0.698	0	0
orf19.1075.1	NO DATA	NO DATA	NO DATA	NO DATA	0	Pseudogene; added to Assembly 21 based on comparative genome analysis
orf19.1077	1.21	0.282	0.767	0.0106	ATM1	Member of MDR subfamily of ABC family; similar to S. cerevisiae ABC transporter, Atm1p; transcriptionally regulated by iron; expression greater in low iron; induced by nitric oxide independent of Yhb1p
orf19.1078	1.817	0.00362	1.133	0.334	HBR2	Putative alanine glyoxylate aminotransferase; regulated by Gcn4p and hemoglobin; stationary phase enriched protein
orf19.1079	1.828	no replicates	1.127	no replicates	#N/A	#N/A
orf19.1080	0.93	0.742	1.093	0.933	0	0
orf19.1082	0.797	0.0331	1.112	0.107	0	0
orf19.1082.1	1.12	0.515	0.922	0.187	0	S. cerevisiae ortholog Cox12p has cytochrome-c oxidase activity, has role in mitochondrial respiratory chain complex IV assembly and localizes to mitochondrial respiratory chain complex IV
orf19.1083	0.731	0.0124	1.47	0.000244	0	Putative protein of unknown function; macrophage-induced gene
orf19.1084	0.884	0.272	0.833	0.0742	CDC39	Protein similar to S. cerevisiae Cdc39p, which is part of the CCR4-NOT transcription regulatory complex; transposon mutation affects filamentous growth
orf19.10841	NO DATA	NO DATA	NO DATA	NO DATA	#N/A	#N/A
orf19.1085	1.098	0.292	0.921	0.283	0	S. cerevisiae ortholog Ubc1p has ubiquitin-protein ligase activity and has role in vesicle organization, ER-associated protein catabolic process, protein ubiquitination involved in ubiquitin-dependent protein catabolic process
orf19.1086	1.221	0.301	0.935	0.245	0	S. cerevisiae ortholog Bre5p has role in ribophagy, protein deubiquitination, regulation of retrograde vesicle-mediated transport, Golgi to ER, regulation of ER to Golgi vesicle-mediated transport and localizes to cytoplasm
orf19.1087	0.828	0.0476	1.024	0.682	0	0
orf19.1089	1.004	0.969	0.873	0.0775	PEX11	Putative protein involved in fatty acid oxidation; expression is Tac1p-dependent
orf19.109	0.922	0.294	0.904	0.122	0	Probable mitochondrial tyrosyl-tRNA synthetase, based on conservation in other fungi
orf19.1090	0.873	0.329	1.108	0.0604	0	0
orf19.1091	0.699	0.0339	1.297	0.00276	0	S. cerevisiae ortholog Nop8p has role in ribosomal large subunit biogenesis and localizes to nucleolus
orf19.1092	0.938	0.568	1.083	0.25	0	S. cerevisiae ortholog Alg3p has alpha-1,3-mannosyltransferase activity, has role in oligosaccharide-lipid intermediate biosynthetic process and localizes to endoplasmic reticulum
orf19.1093	0.869	0.24	0.875	0.0538	FLO8	Transcription factor; required for wild-type hyphal formation; regulates hyphal gene expression; required for virulence in mouse systemic infection; binds Efg1p; binds Mss11p via LisH motif; has LUFS domain; ortholog of S. cerevisiae Flo8p
orf19.1095	0.915	0.541	0.978	0.696	0	Putative nuclear pore complex; possibly an essential gene, disruptants not obtained by UAU1 method
orf19.1096	0.92	0.243	1.122	0.141	0	0
orf19.1097	0.602	no replicates	1.043	no replicates	ALS2	ALS family protein; role in adhesion, biofilm formation, germ tube induction; expressed at infection of human buccal epithelial cells; putative GPI-anchor; induced by ketoconazole, low iron and at cell wall regeneration; regulated by Sfu1p
orf19.1098	0.793	no replicates	1.438	no replicates	#N/A	#N/A
orf19.1099	1.122	no replicates	0.68	no replicates	#N/A	#N/A
orf19.11	0.209	no replicates	NO DATA	NO DATA	0	Gene transcription regulated by Mig1p and Tup1p
orf19.1100	0.681	no replicates	0.246	no replicates	#N/A	#N/A
orf19.1101	1.059	no replicates	1.041	no replicates	#N/A	#N/A
orf19.1102	0.945	no replicates	0.832	no replicates	#N/A	#N/A
orf19.1103	0.751	no replicates	0.717	no replicates	#N/A	#N/A
orf19.1104	NO DATA	NO DATA	1.555	no replicates	#N/A	#N/A
orf19.1105	0.872	0.164	1.264	0.00477	0	0
orf19.1105.2	1.163	0.367	1.045	0.427	PGA56	Regulator of sorbose utilization; putative GPI-anchor; predicted helix-loop helix domain; hyphal induced; induced during cell wall regeneration; colony morphology-related gene regulation by Ssn6p; transcription activated by Tbf1p, Hap43p
orf19.1105.3	NO DATA	NO DATA	1.104	no replicates	0	0
orf19.1106	0.313	0.385	0.51	0.0649	0	Protein with Mob2p-dependent hyphal regulation; fluconazole-induced
orf19.1107	1.278	0.0285	0.949	0.508	0	0
orf19.1108	0.982	0.862	0.917	0.131	HAM1	Putative deoxyribonucleoside triphosphate pyrophosphohydrolase; caspofungin repressed; regulated by Gcn2p and Gcn4p
orf19.1109	0.916	0.318	0.972	0.567	0	0
orf19.111	0.523	0.202	1.031	0.847	CAN2	Basic amino acid permease; arginine metabolism; transcription regulated by Nrg1p, Tup1p; caspofungin and flucytosine induced; shows colony morphology-related regulation by Ssn6p; fungal-specific (no human/murine homolog); Hap43p-repressed
orf19.1110	0.856	0.0829	1.007	0.948	0	Thiamine pyrophosphokinase, phosphorylates thiamine to produce the coenzyme thiamine pyrophosphate (thiamine diphosphate); active as a homodimer
orf19.1111	0.988	0.889	0.937	0.258	0	S. cerevisiae ortholog Taf9p has protein complex scaffold, chromatin binding and has role in histone acetylation, RNA polymerase II transcriptional preinitiation complex assembly
orf19.1112	1.036	0.76	0.897	0.345	BUD7	S. cerevisiae ortholog Bch1p has role in fungal-type cell wall chitin biosynthetic process, Golgi to plasma membrane transport and localizes to ribosome, clathrin-coated vesicle, exomer complex
orf19.1113	1.027	0.783	0.865	0.055	0	0
orf19.1114	1.53	0.0644	1.613	0.0157	0	Membrane-localized protein
orf19.1115	0.977	0.851	1.18	0.042	GUK1	Putative guanylate kinase; identified in extracts from biofilm and planktonic cells; protein level decrease in stationary phase cultures; Hap43p-induced gene
orf19.1116	0.988	0.953	1.073	0.249	0	Planktonic growth-induced gene
orf19.1117	1.451	no replicates	0.58	no replicates	0	Protein similar to Candida boidinii formate dehydrogenase; virulence-group-correlated expression; Hap43p-repressed gene
orf19.1119	1.066	0.447	1.027	0.502	MTR10	Putative importin, member of a family of fungal-specific nuclear importins; transcription is regulated by Mig1p
orf19.1120	0.887	0.0906	0.937	0.301	FAV2	Putative adhesin-like protein; induced by mating factor in MTLa/MTLa opaque cells; greater mRNA abundance observed in a cyr1 homozygous null mutant than in wild type; filament induced; regulated by Nrg1p, Rfg1p, Tup1p
orf19.1121	1.001	0.995	1.231	0.0531	0	0
orf19.1122	1.117	0.769	1.441	0.48	0	Predicted ORF in Assemblies 19, 20 and 21; transcription is induced in response to alpha pheromone in SpiderM medium
orf19.1123	1.707	0.291	1.604	0.247	0	0
orf19.1124	1.41	0.289	1.304	0.143	0	Late-stage biofilm-induced gene
orf19.1124.2	0.886	no replicates	1.191	no replicates	0	S. cerevisiae ortholog Dph5p has diphthine synthase activity, has role in peptidyl-diphthamide biosynthetic process from peptidyl-histidine and localizes to cytoplasm
orf19.1125	0.988	no replicates	1.556	no replicates	#N/A	#N/A
orf19.1126	NO DATA	NO DATA	NO DATA	NO DATA	#N/A	#N/A
orf19.1127	0.896	no replicates	0.807	no replicates	#N/A	#N/A
orf19.1128	0.952	no replicates	1.27	no replicates	#N/A	#N/A
orf19.1129	0.889	no replicates	1.088	no replicates	#N/A	#N/A
orf19.113	215.4	0.00107	95.99	6.54e-06	CIP1	Possible oxidoreductase; transcription induced by cadmium but not by other heavy metals, heat shock, yeast-hyphal switch, oxidative stress (via Cap1p), or macrophage interaction; stationary phase enriched protein
orf19.1130	1.677	no replicates	0.891	no replicates	#N/A	#N/A
orf19.1133	0.986	0.907	0.92	0.331	MSB1	Putative regulator of transcription; expression in S. cerevisiae flo8 and flo11 mutants suggests a role in regulation of adhesion factors
orf19.1135	1.092	0.0927	0.932	0.26	CAS1	Putative transcription factor with beta-barrel DNA-binding motif; involved in telomerase regulation and telomere protection; mutation causes marginal increase in caspofungin sensitivity
orf19.1136	1.098	0.31	0.93	0.488	0	Ortholog of S. cerevisiae Aps2p
orf19.1137	0.988	0.918	1.103	0.189	0	S. cerevisiae ortholog Cdc8p has thymidylate kinase activity, uridylate kinase activity, has role in dTDP biosynthetic process, dTTP biosynthetic process, dUDP biosynthetic process and localizes to nucleus, cytoplasm
orf19.1139	0.986	0.881	1.001	0.982	0	Ortholog of C. glabrata Cagl0b02629gp
orf19.114	1.057	0.472	1.002	0.969	0	0
orf19.1140	0.995	0.96	0.995	0.903	0	0
orf19.1142	0.927	0.624	0.923	0.363	0	Putative vacuolar transporter of large neutral amino acids; transcription is induced in response to alpha pheromone in SpiderM medium
orf19.1143	0.999	0.996	1.066	0.338	0	0
orf19.1144	1.138	0.0976	1.021	0.798	0	Early-stage biofilm-induced gene
orf19.11450	NO DATA	NO DATA	NO DATA	NO DATA	#N/A	#N/A
orf19.1146	1.023	0.856	1.223	0.0376	0	0
orf19.1148	0.877	0.744	1.388	0.39	0	0
orf19.1149	11.42	0.00492	6.223	1.56e-07	MRF1	Putative mitochondrial respiratory protein; induced by farnesol, benomyl treatment, nitric oxide, core stress response; oxidative stress-induced via Cap1p; stationary-phase enriched protein
orf19.115	1.031	0.844	0.891	0.162	0	0
orf19.1150	1.333	0.18	1.163	0.016	0	Predicted ORF in Assemblies 19, 20 and 21; regulated by Gcn2p and Gcn4p
orf19.1150.1	1.199	0.144	1.278	0.00411	0	0
orf19.1151	2.287	no replicates	1.114	no replicates	#N/A	#N/A
orf19.1152	1.635	0.0939	1.335	0.0138	0	Late-stage biofilm-induced gene; regulated by Gcn2p and Gcn4p; induced in core stress response
orf19.1153	1.162	0.304	1.01	0.79	GAD1	Putative glutamate decarboxylase; alkaline, macrophage-downregulated gene; amphotericin B induced; transcriptionally activated by Mnl1p under weak acid stress; stationary phase enriched protein
orf19.1154	0.849	0.158	1.144	0.0701	EGD1	Putative GAL4 DNA-binding enhancer protein; soluble protein in hyphae; biofilm induced; macrophage/pseudohyphal-induced; the same level of protein present in exponential and stationary growth phase yeast cultures
orf19.1155	1.123	0.283	0.884	0.00928	DPP2	Protein similar to S. cerevisiae pyrophosphate phosphatase Lpp1p; possible role in farnesol biosynthesis
orf19.1156	1.069	0.404	0.755	0.0603	FUS1	Probable ortholog of S. cerevisiae Fus1p, a membrane protein required for mating; transcription is activated by Cph1p in mating type a cells, homozygous for the MTLa locus; alpha factor induced
orf19.1158	1.543	0.00655	0.976	0.828	0	Hap43p-repressed gene
orf19.1159	1.289	0.0159	1.063	0.585	0	Protein similar to A. nidulans CYSA serine O-trans-acetylase, suggesting that C. albicans uses an O-acetyl-serine (OAS) pathway of sulfur assimilation; induced upon biofilm formation
orf19.1160	1.072	0.335	0.95	0.283	0	S. cerevisiae ortholog Svp26p has COPII adaptor activity and has role in protein glycosylation, protein retention in Golgi apparatus, fungal-type cell wall organization, ER to Golgi vesicle-mediated transport
orf19.1161	0.913	0.468	0.915	0.0634	PLD1	Phospholipase D1; required for phosphatidic acid and for most diacylglycerol production; required for wild-type mouse virulence, but not rat oral virulence; mutant defect in hyphal growth on solid substrates; similar to S. cerevisiae Spo14p
orf19.1162	3.22	0.0109	2.398	8.66e-07	0	Predicted ORF in Assemblies 19, 20 and 21; increased transcription is observed upon benomyl treatment
orf19.1162.1	1.25	0.167	1.306	0.0652	0	0
orf19.1163	1.038	0.62	1.23	0.0085	0	Ortholog of S. cerevisiae Ydr336wp
orf19.1164	0.781	0.0465	1.204	0.00232	GAR1	Putative H/ACA snoRNP pseudouridylase complex protein; mutation confers hypersensitivity to tubercidin (7-deazaadenosine); macrophage/pseudohyphal-induced
orf19.1166	1.103	0.298	0.86	0.0634	CTA3	Protein similar to S. cerevisiae Ede1p, which is involved in endocytosis; activates transcription in 1-hybrid assay in S. cerevisiae
orf19.1167	3.29	0.0406	2.175	0.0089	0	S. cerevisiae ortholog Jlp1p has sulfonate dioxygenase activity and has role in sulfur compound catabolic process
orf19.1168	1.178	0.0706	1.03	0.7	ZCF3	Predicted zinc-finger protein; required for wild-type filamentous growth and resistance to rapamycin and flucytosine; possibly an essential gene, disruptants not obtained by UAU1 method; Hap43p-repressed gene; biofilm-induced
orf19.1169	1.537	0.0635	1.38	0.0891	0	S. cerevisiae ortholog Jid1p localizes to mitochondrion
orf19.117	1.066	0.301	0.888	0.0451	0	S. cerevisiae ortholog Sec9p has SNAP receptor activity, has role in vesicle fusion and localizes to SNARE complex, extrinsic to plasma membrane
orf19.1170	0.993	0.91	0.87	0.0419	ARO7	Putative chorismate mutase; fungal-specific (no human or murine homolog); alkaline upregulated
orf19.1171	0.956	0.943	NO DATA	NO DATA	0	0
orf19.1172	2.847	no replicates	0.872	no replicates	#N/A	#N/A
orf19.1173	0.672	no replicates	0.581	no replicates	#N/A	#N/A
orf19.1174	0.756	no replicates	1.179	no replicates	#N/A	#N/A
orf19.1175	NO DATA	NO DATA	NO DATA	NO DATA	#N/A	#N/A
orf19.1177	1.145	0.168	0.938	0.301	0	Ortholog of S. cerevisiae RTT106; Hap43p-repressed gene
orf19.1178	1.118	0.453	1.167	0.406	0	Putative transcription factor with bZIP DNA-binding motif; Hap43p-repressed gene
orf19.1179	1.097	0.158	1.047	0.405	0	Transcriptionally regulated by iron; expression greater in high iron; possibly subject to Kex2p processing; Hap43p-repressed gene
orf19.118	0.887	0.237	1.028	0.677	FAD2	Delta-12 fatty acid desaturase, involved in production of linoleic acid, which is a major component of membranes
orf19.1180	1.29	0.0747	0.764	4.25e-05	0	S. cerevisiae ortholog Yer152cp has 2-aminoadipate transaminase activity and localizes to nucleus, cytoplasm
orf19.1181	0.82	0.447	0.943	0.761	0	0
orf19.1182	0.998	0.979	1.008	0.885	0	S. cerevisiae ortholog Vam7p has SNAP receptor activity, phosphatidylinositol-3-phosphate binding and has role in vesicle fusion, vacuole fusion, non-autophagic, piecemeal microautophagy of nucleus
orf19.1183	1.034	0.639	0.978	0.718	0	Ortholog of C. glabrata Cagl0l03938gp
orf19.1185	0.912	0.355	0.96	0.557	0	S. cerevisiae ortholog Dma1p has ubiquitin-protein ligase activity and has role in establishment of mitotic spindle orientation, protein autoubiquitination, mitotic cell cycle spindle assembly checkpoint, septin ring assembly
orf19.1186	1.131	0.123	0.811	0.0177	0	0
orf19.1187	1.138	0.257	1.04	0.537	CPH2	Myc-bHLH family transcriptional activator of hyphal growth; directly regulates Tec1p, which regulates hypha-specific genes; probably homodimeric, phosphorylated; required for wild-type levels of Candida colonization of the mouse GI tract
orf19.1189	0.904	0.134	0.989	0.822	0	Late-stage biofilm-induced gene; transcription regulated upon yeast-hyphal switch; transcriptionally activated by Mnl1p under weak acid stress; contains a 5' UTR intron
orf19.119	0.841	0.0766	1.13	0.137	0	Ortholog of C. glabrata Cagl0f02805gp
orf19.1190	1.03	0.762	0.747	0.0169	0	0
orf19.1191	1.122	0.275	0.747	0.000865	0	S. cerevisiae ortholog Hrd3p has ubiquitin-protein ligase activity and has role in ER-associated protein catabolic process
orf19.1192	1.066	0.616	0.862	0.188	DNA2	Protein similar to S. cerevisiae Dna2p, which is a DNA replication factor involved in DNA repair; induced under hydroxyurea treatment
orf19.1193	0.777	0.0595	1.264	0.0448	GNP1	Protein similar to asparagine and glutamine permease; fluconazole or caspofungin induced; transcription is regulated by Nrg1p, Mig1p, Tup1p, Gcn2p, Gcn4p, and alkaline regulated by Rim101p; biofilm-induced; fungal-specific
orf19.1195	1.035	0.576	0.884	0.00111	0	S. cerevisiae ortholog Oct1p has metalloendopeptidase activity, has role in cellular iron ion homeostasis, protein processing involved in protein targeting to mitochondrion and localizes to mitochondrion
orf19.1196	1.022	0.797	0.893	0.151	0	S. cerevisiae ortholog Pkh3p has role in MAPKKK cascade involved in cell wall biogenesis
orf19.1198	1.129	0.179	0.954	0.239	0	Predicted ORF in Assemblies 19, 20 and 21; possibly an essential gene, disruptants not obtained by UAU1 method
orf19.1199	0.798	0.0595	1.206	0.0165	NOP5	Protein similar to S. cerevisiae Nop5p protein of small nucleolar ribonucleoprotein complex; transposon mutation affects filamentous growth; macrophage/pseudohyphal-induced; physically interacts with TAP-tagged Nop1p
orf19.120	0.714	0.0227	0.938	0.43	0	0
orf19.1200	0.913	0.235	1.06	0.334	0	Planktonic growth-induced gene
orf19.1201	1.005	0.942	0.933	0.184	0	S. cerevisiae ortholog Dia4p has serine-tRNA ligase activity, has role in invasive growth in response to glucose limitation, pseudohyphal growth, mitochondrial seryl-tRNA aminoacylation and localizes to mitochondrion
orf19.1202	1.006	0.954	1.01	0.903	0	0
orf19.1203	1.138	0.121	0.806	0.00714	SRO77	Protein with a predicted role in docking and fusion of post-Golgi vesicles with the plasma membrane; filament induced; fungal-specific (no human or murine homolog)
orf19.1203.1	0.884	0.186	0.829	0.0169	0	0
orf19.1204	0.99	0.89	1.029	0.544	0	Phosphorylated protein of unknown function, transcription is upregulated clinical isolates from HIV positive patients with oral candidiasis
orf19.1205	0.903	no replicates	1.15	no replicates	#N/A	#N/A
orf19.1206	0.531	no replicates	1.265	no replicates	#N/A	#N/A
orf19.1207	1.9	no replicates	1.4	no replicates	0	0
orf19.1208	NO DATA	NO DATA	NO DATA	NO DATA	0	Predicted ORF in Assemblies 19, 20 and 21; member of a family encoded by FGR6-related genes in the RB2 repeat sequence
orf19.1208.1	NO DATA	NO DATA	NO DATA	NO DATA	#N/A	#N/A
orf19.1209	0.626	no replicates	0.815	no replicates	#N/A	#N/A
orf19.121	1.131	0.0846	1.047	0.436	ARC18	Putative ARP2/3 complex subunit; mutation confers hypersensitivity to cytochalasin D
orf19.1210	1.028	0.827	1.029	0.769	0	S. cerevisiae ortholog Avt6p has L-glutamate transmembrane transporter activity, L-aspartate transmembrane transporter activity, has role in amino acid export from vacuole and localizes to fungal-type vacuole membrane
orf19.1211	NO DATA	NO DATA	NO DATA	NO DATA	#N/A	#N/A
orf19.1212	1.061	0.771	0.889	0.34	0	0
orf19.1214	0.875	0.151	1.115	0.0788	0	S. cerevisiae ortholog Map2p has metalloaminopeptidase activity and has role in protein initiator methionine removal involved in protein maturation
orf19.1215	1.027	0.863	0.377	0.343	0	0
orf19.1217	0.832	0.0799	0.968	0.607	0	0
orf19.1218	NO DATA	NO DATA	NO DATA	NO DATA	#N/A	#N/A
orf19.1219	0.772	0.071	0.963	0.773	0	0
orf19.122	0.891	0.292	1.164	0.0243	CDC20	Protein similar to S. cerevisiae Cdc20p; induced under Cdc5p depletion; member of conserved Mcm1p regulon; mRNA expression peaks at cell-cycle G2/M phase; mRNA binds to She3p and is localized to buds of yeast-form cells and hyphal tips
orf19.1220	1.016	0.868	0.906	0.134	RVS167	SH3-domain- and BAR domain-containing protein involved in endocytosis; null mutant exhibits defects in hyphal growth, virulence, cell wall integrity, and actin patch localization; cosediments with phosphorylated Myo5p
orf19.1221	1.068	0.512	1.005	0.949	ALG2	Putative mannosyltransferase involved in cell wall mannan biosynthesis; transcription is elevated in chk1, nik1, and sln1 homozygous null mutants
orf19.1222	1.082	no replicates	0.97	no replicates	#N/A	#N/A
orf19.1223	0.912	0.319	1.217	0.00792	DBF2	Essential serine/threonine protein kinase involved in mitotic spindle formation and cytokinesis; required for septum formation, exit from mitosis, and normal hyphal morphogenesis; virulence-group-correlated expression
orf19.1224	0.646	0.0126	0.949	0.47	FRP3	Putative ammonium transporter; upregulated in the presence of human neutrophils; fluconazole-downregulated; repressed by nitric oxide
orf19.1225	0.868	0.596	0.83	0.0638	PEX22	Putative peroxin
orf19.1226	0.671	no replicates	1.132	no replicates	#N/A	#N/A
orf19.1227	0.829	0.434	0.757	0.0238	ZCF4	Putative transcription factor with zinc cluster DNA-binding motif
orf19.1228	0.883	0.388	1.134	0.0683	HAP2	CCAAT-binding factor regulates low-iron induction of FRP1, in these conditions CBF comprises Hap43p and probably Hap2p and Hap3p; possibly an essential gene, disruptants not obtained by UAU1 method; Cap1p-dependent induction in low iron
orf19.1229	0.868	0.334	0.981	0.822	0	S. cerevisiae ortholog Cse1p has importin-alpha export receptor activity, has role in protein export from nucleus and localizes to nuclear envelope
orf19.123	0.965	0.794	0.837	0.0113	RCN1	Protein involved in calcineurin-dependent signaling that controls stress response and virulence; inhibits calcineurin function
orf19.1230	0.926	no replicates	1.037	no replicates	#N/A	#N/A
orf19.1231	0.648	no replicates	0.953	no replicates	#N/A	#N/A
orf19.1232	0.864	0.0778	0.895	0.204	VRG4	GDP-mannose transporter; essential; required for glycosylation, hyphal growth; functional homolog of S. cerevisiae Vrg4p, which imports GDP-mannose from cytoplasm to Golgi for protein and lipid mannosylation; no mammalian homolog
orf19.1233	0.745	0.0358	1.075	0.282	ADE4	Putative phosphoribosylpyrophosphate amidotransferase; flucytosine induced
orf19.1234	1.414	no replicates	0.676	no replicates	FGR6-10	Protein lacking an ortholog in S. cerevisiae; member of a family encoded by FGR6-related genes in the RB2 repeat sequence; transposon mutation affects filamentous growth
orf19.1235	0.877	0.11	0.974	0.646	HOM3	Putative L-aspartate 4-P-transferase; fungal-specific (no human or murine homolog); regulated by Gcn2p and Gcn4p; early-stage biofilm-induced gene
orf19.1236	0.979	0.864	1.026	0.707	0	S. cerevisiae ortholog Gvp36p has role in vacuole organization, endocytosis, establishment or maintenance of actin cytoskeleton polarity and localizes to integral to Golgi membrane
orf19.1237	5.082	0.0222	2.141	0.000198	ARO9	Aromatic transaminase of the Ehrlich fusel oil pathway of aromatic alcohol biosynthesis; Rim101p-dependent pH-regulation (alkaline induced); Hap43p-induced gene
orf19.1238	1	0.997	1.137	0.0514	TUB4	Putative gamma-tubulin; induced upon adherence to polystyrene; transcription is regulated by Nrg1p and Mig1p; periodic mRNA expression, peak at cell-cycle S/G2 phase
orf19.1239	0.808	0.222	0.737	0.243	0	Secreted protein; exogenously expressed protein is a substrate for Kex2p processing in vitro; fluconazole-regulated
orf19.124	0.761	0.217	1.056	0.404	CIC1	Putative proteasome-interacting protein; transcription is upregulated in both intermediate and mature biofilms
orf19.1240	1.547	0.0816	1.133	0.258	0	Ortholog of S. cerevisiae Ypr117wp
orf19.1244	0.971	0.728	1.062	0.442	GYP2	S. cerevisiae ortholog Mdr1p has Rab GTPase activator activity, has role in intracellular protein transport and localizes to cytoplasm
orf19.1246	1.03	0.754	0.89	0.0729	0	Predicted ORF in Assemblies 19, 20 and 21; greater mRNA abundance observed in a cyr1 homozygous null mutant than in wild type
orf19.1247	1.097	0.609	0.964	0.697	0	0
orf19.1248	0.98	0.819	0.905	0.0309	0	Putative RNA polymerase II subunit B44; heterozygous null mutant exhibits resistance to parnafungin in the C. albicans fitness test
orf19.1249	0.977	0.76	1.084	0.137	0	S. cerevisiae ortholog His6p has 1-(5-phosphoribosyl)-5-[(5-phosphoribosylamino)methylideneamino]imidazole-4-carboxamide isomerase activity and has role in histidine biosynthetic process
orf19.125	NO DATA	NO DATA	NO DATA	NO DATA	EBP1	NADPH oxidoreductase; interacts with phenolic substrates, such as 17beta-estradiol; possible role in response to estrogen; induced by oxidative and weak acid stress, nitric oxide, benomyl; activated by Cap1p, Mnl1p; Sko1p-, Hap43p-repressed
orf19.1250	0.825	0.0723	1.258	0.0262	0	S. cerevisiae ortholog Faf1p has role in maturation of SSU-rRNA from tricistronic rRNA transcript (SSU-rRNA, 5.8S rRNA, LSU-rRNA) and localizes to nucleolus, cytoplasm
orf19.1251	1.089	0.465	1.023	0.785	BRN1	Putative condensin complex subunit; cell-cycle regulated periodic mRNA expression
orf19.1252	1.004	0.956	0.87	0.0319	YME1	S. cerevisiae ortholog Yme1p has ATP-dependent peptidase activity, has role in misfolded or incompletely synthesized protein catabolic process, chronological cell aging, mitochondrion organization and localizes to i-AAA complex
orf19.1253	0.799	0.0728	0.951	0.328	0	Protein required for growth in medium lacking phosphate and for resistance to copper and Phloxine B; transcriptionally activated by Mnl1p under weak acid stress
orf19.1254	0.854	0.0357	0.806	0.0115	SEC23	Putative GTPase-activating protein; transcription is regulated upon yeast-hyphal switch
orf19.1255	0.958	0.811	0.796	0.13	ZCF5	Putative transcription factor with zinc cluster DNA-binding motif; shows colony morphology-related gene regulation by Ssn6p
orf19.1256	0.702	no replicates	0.816	no replicates	#N/A	#N/A
orf19.1257	1.549	no replicates	1.045	no replicates	0	0
orf19.1258	0.94	0.729	0.846	0.0884	0	Putative adhesin-like protein; regulated by Tsa1p, Tsa1Bp in minimal media at 37 deg; transcription is induced in response to alpha pheromone in SpiderM medium; clade-associated gene expression; Hap43p-induced gene
orf19.1259	0.825	0.0636	1.038	0.507	0	S. cerevisiae ortholog Snt2p has DNA binding and localizes to Snt2C complex, cytoplasm
orf19.126	1.175	no replicates	0.693	no replicates	#N/A	#N/A
orf19.1260	1.038	0.801	1.005	0.919	LEA1	Protein similar to S. cerevisiae Lea1p; transcription is induced in response to alpha pheromone in SpiderM medium
orf19.1261	0.935	0.342	0.999	0.981	CGT1	mRNA 5' guanylyltransferase; small subunit of mRNA capping enzyme; binds an RNA Pol II C-terminal domain peptide; Cet1p and Cgt1p form a 2:1 complex; functional homolog of S. cerevisiae Ceg1p
orf19.1263	0.572	0.0083	0.934	0.274	CFL1	Protein similar to ferric reductase Fre10p; possible functional homolog of S. cerevisiae Fre1p (reports differ); transcription is negatively regulated by Sfu1p, copper, amphotericin B, caspofungin; induced by ciclopirox olamine
orf19.1264	0.284	0.0198	0.394	0.00246	CFL2	Iron utilization protein; putative oxidoreductase; regulated by Sfu1p, Nrg1p, Tup1p, Rim101p; alkaline, low iron, fluphenazine, ciclopirox olamine, flucytosine, fluconazole, biofilm induced; caspofungin, amphotericin B repressed
orf19.1265	1.153	0.477	0.813	0.0489	0	Ortholog of C. glabrata Cagl0f03949gp
orf19.1266	0.893	0.434	0.995	0.967	0	Predicted ORF in Assemblies 19, 20 and 21; transcription detected in high-resolution tiling array experiments
orf19.1267	1.031	0.779	1.193	0.0623	0	Ortholog of S. cerevisiae Caj1p
orf19.1267.1	1.515	0.0098	1.359	0.0395	0	S. cerevisiae ortholog Isd11p has role in iron-sulfur cluster assembly and localizes to mitochondrial matrix, extrinsic to mitochondrial inner membrane
orf19.1268	0.985	0.901	1.17	0.431	0	Predicted ORF in Assemblies 19, 20 and 21; transcription detected in high-resolution tiling array experiments
orf19.127	0.733	no replicates	1.75	no replicates	#N/A	#N/A
orf19.1270	0.751	0.347	1.017	0.931	FRE3	Protein with similarity to ferric reductase Fre10p; possibly an essential gene, disruptants not obtained by UAU1 method
orf19.1272	0.811	0.0732	1.075	0.206	0	S. cerevisiae ortholog Ygr111wp has role in regulation of cell size and localizes to nucleus, cytoplasm
orf19.1273	0.926	0.387	1.111	0.0479	0	S. cerevisiae ortholog Gim3p has tubulin binding, has role in tubulin complex assembly and localizes to prefoldin complex
orf19.1274	0.984	no replicates	0.746	no replicates	0	0
orf19.1275	1.724	0.0139	0.948	0.491	GAT1	Zinc finger transcriptional regulator of nitrogen utilization; required for nitrogen catabolite repression and utilization of isoleucine, tyrosine and tryptophan N sources; required for virulence in a mouse systemic infection model
orf19.1276	1.049	0.513	1.029	0.621	0	Predicted ORF in Assemblies 19, 20 and 21; not essential for viability; similar to S. cerevisiae Vhs3p, which is a putative phosphopantothenoylcysteine decarboxylase
orf19.1277	1.077	0.746	1.215	0.365	0	Hap43p-repressed gene; repressed by Rgt1p; late-stage biofilm-induced gene
orf19.1278	0.862	no replicates	0.935	no replicates	#N/A	#N/A
orf19.1279	0.875	0.199	0.813	0.0236	CDS1	Protein similar to S. cerevisiae Cds1p; transposon mutation affects filamentous growth
orf19.1280	0.947	0.784	0.966	0.632	SUI1	Putative translation initiation factor; flucytosine induced; genes encoding ribosomal subunits, translation factors, and tRNA synthetases are downregulated upon phagocytosis by murine macrophage
orf19.1281	0.824	0.103	0.977	0.661	0	0
orf19.1282	1.035	0.691	1.024	0.761	CKS1	S. cerevisiae ortholog Cks1p has histone binding, ubiquitin binding, protein kinase activator activity and has role in chromatin remodeling, transcription, DNA-dependent, positive regulation of transcription, DNA-dependent
orf19.1283	1.07	0.543	1.071	0.502	MEC1	Cell cycle checkpoint protein with a role in genome integrity; RNA abundance regulated by tyrosol and cell density
orf19.1285	1.397	0.0351	0.807	0.007	0	Plasma membrane-localized protein of unknown function; Hap43p-repressed gene
orf19.1286	0.779	0.264	0.56	no replicates	0	0
orf19.1287	0.837	0.0945	1.017	0.796	0	Biofilm-induced gene
orf19.1288	0.822	0.388	0.315	0.000318	FOX2	3-hydroxyacyl-CoA epimerase, required for fatty acid beta-oxidation; upregulated upon phagocytosis; transcription regulated by Mig1p, by white-opaque switching and by DNA methylation; transcriptional activation by oleate requires Ctf1p
orf19.1289	0.939	0.434	0.986	0.872	SCT1	Putative glycerol-3-phosphate O-acyltransferase; fungal-specific (no human or murine homolog)
orf19.129	1.4	no replicates	0.692	no replicates	#N/A	#N/A
orf19.1290	1.058	0.695	0.941	0.727	XKS1	Putative xylulokinase; Hap43p-repressed gene; increased expression in response to prostaglandins
orf19.1291	0.916	0.368	1.079	0.449	ABZ1	S. cerevisiae ortholog Abz1p has 4-amino-4-deoxychorismate synthase activity, has role in para-aminobenzoic acid biosynthetic process and localizes to cytoplasm
orf19.1293	0.858	no replicates	0.762	no replicates	#N/A	#N/A
orf19.1294	0.897	no replicates	0.886	no replicates	#N/A	#N/A
orf19.1295	1.022	0.844	0.895	0.127	VAS1	Putative tRNA-Val synthetase; genes encoding ribosomal subunits, translation factors, and tRNA synthetases are downregulated upon phagocytosis by murine macrophage
orf19.1296	0.88	0.208	1.095	0.202	0	S. cerevisiae ortholog Prp31p has role in spliceosomal snRNP assembly and localizes to mitochondrion, U4/U6 x U5 tri-snRNP complex
orf19.1297	1.089	0.446	0.934	0.663	0	S. cerevisiae ortholog Atg20p has phosphatidylinositol-3-phosphate binding and has role in CVT pathway, early endosome to Golgi transport, mitochondrion degradation, macroautophagy
orf19.1298	0.858	0.0978	1.09	0.429	NUP84	Ortholog of S. cerevisiae Nup84p
orf19.1299	1.133	0.423	0.763	0.0307	RPN6	Putative 26S proteasome subunit; Hap43p-induced gene; regulated by Gcn2p and Gcn4p
orf19.13	1.898	no replicates	1.156	no replicates	#N/A	#N/A
orf19.130	0.934	0.402	0.949	0.494	0	Ortholog of S. cerevisiae Vps15p
orf19.1300	0.924	0.331	1.052	0.568	0	Putative mitochondrial membrane protein; homozygous transposon insertion causes decreased colony wrinkling under filamentous growth-inducing conditions, but does not block true hyphal formation in liquid media
orf19.1301	1.105	0.0584	1.106	0.142	0	0
orf19.1302	0.82	0.436	1.046	0.939	0	0
orf19.1303	0.88	0.259	1.141	0.0322	0	S. cerevisiae ortholog Mrf1p has translation release factor activity, has role in mitochondrial translational termination and localizes to mitochondrion
orf19.1304	0.986	0.959	1.17	0.0168	0	Ortholog of S. cerevisiae Rrp4p
orf19.1305	0.843	0.0694	1.221	0.0221	0	S. cerevisiae ortholog Trm5p has tRNA (guanine) methyltransferase activity, has role in tRNA methylation and localizes to mitochondrial matrix, nucleus
orf19.1306	0.637	0.046	1.099	0.00619	0	0
orf19.1307	1.134	0.378	0.905	0.255	0	0
orf19.1308	1.083	0.537	1.017	0.86	0	Predicted membrane transporter, member of the drug:proton antiporter (14 spanner) (DHA2) family, major facilitator superfamily (MFS)
orf19.1309	1.143	0.147	0.887	0.0914	0	0
orf19.131	0.774	0.131	0.831	0.0557	0	0
orf19.131.2	1.053	0.484	1.038	0.693	0	S. cerevisiae ortholog Ypr063cp localizes to endoplasmic reticulum
orf19.1310	0.984	0.933	0.93	0.43	0	S. cerevisiae ortholog Rad34p has role in nucleotide-excision repair and localizes to nucleus
orf19.1311	0.173	0.648	NO DATA	NO DATA	SPO75	0
orf19.1312	0.782	no replicates	1.108	no replicates	#N/A	#N/A
orf19.1313	0.77	0.0808	1.17	0.0736	CDR3	Transporter of the Pdrp/Cdrp family of the ATP-binding cassette (ABC) superfamily; transports phospholipids in an out-to-in direction; expressed in opaque-phase cells; induced by macrophage interaction; fluconazole-downregulated
orf19.1314	1.027	0.636	0.974	0.711	0	Planktonic growth-induced gene
orf19.1317	1.194	0.0335	0.87	0.0456	OSH3	Protein required for wild-type filamentation; has oxysterol binding protein domain and pleckstrin homology motif; overproducton suppresses cph1 homozygous null filamnetation defect; similar to S. cerevisiae Osh3p
orf19.1318	1.03	0.741	1.103	0.18	0	0
orf19.132	0.899	0.227	0.884	0.173	0	S. cerevisiae ortholog Sif2p has role in negative regulation of meiosis, negative regulation of chromatin silencing at telomere, positive regulation of stress-activated MAPK cascade, histone deacetylation
orf19.1321	0.947	0.642	0.803	0.0627	HWP1	Hyphal cell wall protein; covalently crosslinked to epithelial cells by host transglutaminase; opaque- and a-specific, alpha-factor induced; at MTLa side of conjugation tube; assessment of virulence role complicated by URA3 effects
orf19.1323	0.97	0.812	0.995	0.924	0	Phosphorylated protein of unknown function; Hap43p-repressed gene
orf19.1324	0.952	0.599	1.037	0.633	RAD2	Ortholog of S. cerevisiae RAD2, nucleotide excision repair nuclease; null mutant is extremely sensitive to UV irradiation; transcription is upregulated upon interaction with macrophages
orf19.1325	1.077	0.699	0.97	0.853	ECM38	Putative gamma-glutamyltransferase; alkaline upregulated; possibly an essential gene, disruptants not obtained by UAU1 method
orf19.1326	1.018	0.908	0.957	0.734	0	0
orf19.1327	0.898	0.812	1.282	0.376	RBT1	Cell wall protein with similarity to Hwp1p, required for virulence; predicted glycosylation; Tup1p repressed; serum, hyphal and alkaline induced; farnesol, alpha factor induced; Rfg1p-, Rim101p-regulated; fluconazole-repressed
orf19.1329	1.043	no replicates	0.856	no replicates	#N/A	#N/A
orf19.133	0.186	0.369	1.731	0.252	0	Protein of unknown function; induced by nitric oxide independent of Yhb1p
orf19.1330	1.303	no replicates	0.83	no replicates	0	0
orf19.1331	1.147	0.45	0.876	0.0555	HSM3	S. cerevisiae ortholog Hsm3p has role in proteasome regulatory particle assembly, mismatch repair and localizes to nucleus, cytosol, proteasome regulatory particle, base subcomplex
orf19.1332	1.01	0.937	1.169	0.096	SNG4	Putative membrane transporter; Hap43p-induced gene; transcriptionally activated by Mnl1p under weak acid stress; shows Mob2p-dependent hyphal regulation
orf19.1333	1.025	0.812	1.299	0.00133	SNG3	Putative membrane transporter; Hap43p-induced gene; mutation confers hypersensitivity to toxic ergosterol analog; shows colony morphology-related gene regulation by Ssn6p
orf19.1334	0.915	0.356	1.231	0.00295	0	Predicted ORF in Assemblies 19, 20 and 21; transcription is repressed in response to alpha pheromone in SpiderM medium
orf19.1335	0.728	0.0109	1.157	0.0537	0	Hap43p-induced gene; ortholog of S. cerevisiae MTR4, an ATP-dependent 3'-5' RNA helicase of the DEAD-box family
orf19.1336	1.09	0.366	0.828	0.0211	PUP3	Putative beta 3 subunit of the 20S proteasome; macrophage/pseudohyphal-repressed
orf19.1336.2	1.048	0.634	1.409	0.00385	0	S. cerevisiae ortholog Cmc2p has role in mitochondrial respiratory chain complex assembly and localizes to nucleus, mitochondrial intermembrane space
orf19.1338	1.091	0.398	0.903	0.234	0	Ortholog of C. glabrata Cagl0l05522gp
orf19.1339	1.837	0.0732	1.07	0.273	CPY1	Carboxypeptidase Y; transcriptionally regulated at yeast-hyphal transition or macrophage response; upregulated in the presence of human neutrophils; regulated by Gcn2p and Gcn4p; putative N-glycosylation
orf19.134	1.35	0.305	1.097	0.903	0	Predicted ORF in Assemblies 19, 20 and 21; ciclopirox olamine induced
orf19.1340	5.312	4.93e-05	1.582	0.00138	0	Putative aldose reductase; protein level decreases in stationary phase cultures
orf19.1341	0.722	0.032	1.077	0.296	PRR2	Putative serine/threonine protein kinase; mutation confers resistance to 5-fluorocytosine (5-FC)
orf19.1342	0.905	0.301	1.064	0.164	SHM1	Mitochondrial serine hydroxymethyltransferase; complements the glycine auxotrophy of an S. cerevisiae shm1 null shm2 null gly1-1 triple mutant; protein present in exponential and stationary growth phase yeast cultures
orf19.1343	0.886	0.414	0.941	0.326	0	Putative RNA polymerase II mediator complex subunit; induced by nitric oxide
orf19.1344	0.554	0.0184	0.618	0.000176	0	Predicted ORF in Assemblies 19, 20 and 21; fluconazole-induced
orf19.1345	0.764	0.177	0.798	0.207	LIP8	Secreted lipase, member of a differentially expressed lipase gene family with possible roles in nutrition and/or in creating an acidic microenvironment; LIP5 and LIP8 are expressed at all stages of both mucosal and systemic infection
orf19.1346	0.734	no replicates	0.727	no replicates	#N/A	#N/A
orf19.1347	NO DATA	NO DATA	1.3	no replicates	#N/A	#N/A
orf19.1348	1.092	0.684	0.844	0.427	0	0
orf19.1349	1.418	0.743	0.328	0.298	0	0
orf19.135	0.968	0.666	0.891	0.149	EXO84	Predicted subunit of the exocyst complex, involved in exocytosis; localizes to a crescent on the surface of the hyphal tip
orf19.1350	1.011	0.872	1.215	0.0186	0	0
orf19.1351	0.522	0.438	1.217	0.18	0	0
orf19.1352	0.976	0.779	1.111	0.0673	TIM22	Mitochondrial inner membrane protein with a predicted role in protein import; Hap43p-repressed gene; late-stage biofilm-induced gene
orf19.1353	1.33	0.532	1.113	0.354	0	Biofilm-and planktonic growth-induced gene; transcription downregulated upon yeast-hyphal switch; Ras1p-regulated
orf19.1354	0.831	0.67	1.618	0.381	UCF1	Hap43p-repressed gene; mRNA binds She3p; transcription induced in high iron, decreased upon yeast-hyphal switch; downregulation correlates with clinical development of fluconazole resistance; Ras1p-regulated; biofilm-induced gene
orf19.1355	0.837	0.044	0.987	0.866	0	Putative protein of unknown function; stationary phase enriched protein
orf19.1356	1.263	0.0305	0.947	0.425	0	S. cerevisiae ortholog Tum1p has thiosulfate sulfurtransferase activity, has role in tRNA wobble position uridine thiolation and localizes to cytoplasm
orf19.1357	0.967	0.721	1.23	0.0134	FCY21	High affinity, high capacity, hypoxanthine-adenine-guanine-cytosine/ H+ symporter; purine-cytosine permease of pyrimidine salvage; similar to S. cerevisiae Fcy2p; mutation confers resistance to 5-fluorocytosine (5-FC); biofilm-induced gene
orf19.1358	1.083	0.253	1.093	0.0867	GCN4	Transcriptional activator of general amino acid control response; required for Efg1p-dependent pseudohyphal induction by amino acid starvation, not by serum; required for normal biofilm formation; upregulated by human whole blood and PMN
orf19.1359	1.076	0.36	0.74	0.000299	0	0
orf19.136	0.778	0.0196	1.122	0.0321	0	Predicted membrane transporter, member of the drug:proton antiporter (12 spanner) (DHA1) family, major facilitator superfamily (MFS); Hap43p-repressed gene
orf19.1360	0.777	0.195	1.178	0.0984	0	0
orf19.1360.1	1.016	0.817	1.07	0.367	0	Putative adhesin-like protein
orf19.1361	0.901	0.35	0.954	0.177	TIM23	Protein involved in mitochondrial matrix protein import
orf19.1362	0.773	0.0534	1.177	0.024	SMM1	Putative dihydrouridine synthase; Hap43p-induced gene; transcription is upregulated in both intermediate and mature biofilms
orf19.1363	1.176	0.397	1.919	4.18e-05	0	Putative protein of unknown function; late-stage biofilm-induced gene; Plc1p-regulated; transcriptionally activated by Mnl1p under weak acid stress
orf19.1364	0.8	0.0365	0.916	0.52	0	Hap43p-repressed gene; constitutive expression independent of MTL or white-opaque status
orf19.1365	0.86	0.167	0.885	0.177	0	Putative monooxygenase; mutation confers hypersensitivity to toxic ergosterol analog; constitutive expression independent of MTL or white-opaque status
orf19.1366	1.206	0.594	0.439	0.566	0	0
orf19.1367	0.901	0.279	1.171	0.106	MTW1	Kinetochore component; amount of Nuf2p and Mtw1p protein detected at each centromere is consistent with a single kinetochore microtubule attachment site
orf19.1367.1	NO DATA	NO DATA	NO DATA	NO DATA	0	0
orf19.1368	0.614	0.0954	1.191	0.468	0	Biofilm-induced gene
orf19.1369	1.04	0.711	0.771	0.0857	0	Hap43p-repressed gene
orf19.137	0.893	0.282	0.802	0.0136	0	Planktonic growth-induced gene; transcription is induced in response to alpha pheromone in SpiderM medium
orf19.1370	2.075	0.0529	0.409	0.544	0	Predicted ORF in Assemblies 19, 20 and 21; expression is regulated upon white-opaque switching; transcription is repressed in response to alpha pheromone in SpiderM medium
orf19.1371	0.802	0.0598	1.004	0.962	0	0
orf19.1372	1.195	no replicates	0.886	no replicates	0	Gene transcription regulated by Mig1p and Tup1p
orf19.1373	1.427	0.0099	0.833	0.213	INP51	Putative phosphatidylinositol-4,5-bisphosphate phosphatase; involved in maintenance of phosphoinositide levels; affects hyphal growth, virulence, cell integrity; interacts with Irs4p
orf19.1374	0.86	0.104	1.072	0.332	0	0
orf19.1375	1.386	0.00617	0.87	0.0703	LEU42	Putative alpha-isopropylmalate synthase; fungal-specific (no human/murine homolog); upregulated in the presence of human blood or polymorphonuclear cells; regulated by Gcn2p and Gcn4p; stationary phase enriched protein
orf19.1376	0.887	0.25	1.033	0.539	0	S. cerevisiae ortholog Sso2p has SNAP receptor activity, phosphatidic acid binding and has role in ascospore-type prospore formation
orf19.1377	1.066	0.573	0.847	0.0439	IPK2	Putative inositol polyphosphate multikinase; moderately induced at 42 deg
orf19.1378	0.863	0.159	1.018	0.809	SUP35	Translation factor eRF3; shows prion-like aggregation in some, not all, studies; partially complements S. cerevisiae sup35 mutant translation defect; species barrier with S. cerevisiae Sup35p prion; gene not regulated by yeast-hyphal switch
orf19.138	0.921	0.897	1.026	0.936	FIG1	Probable ortholog of S. cerevisiae Fig1p, which is an integral membrane protein required for mating; role in thigmotropism; transcription is opaque-specific, a-specific, and activated by Cph1p or alpha pheromone
orf19.1381	1.173	0.221	0.841	0.0613	0	S. cerevisiae ortholog Lsb5p has role in actin filament organization, endocytosis, actin cortical patch localization and localizes to actin cortical patch
orf19.1382	0.944	0.723	1.228	0.0258	YEA4	Protein similar to S. cerevisiae Yea4p; transcription is induced in response to alpha pheromone in SpiderM medium
orf19.1383	1.05	0.582	0.969	0.391	0	Predicted ORF in Assemblies 19, 20 and 21; transcription is induced in response to alpha pheromone in SpiderM medium
orf19.1384	1.047	no replicates	0.957	no replicates	#N/A	#N/A
orf19.1386	0.971	0.658	0.993	0.901	0	S. cerevisiae ortholog Bet1p has SNAP receptor activity and has role in vesicle fusion, retrograde vesicle-mediated transport, Golgi to ER, ER to Golgi vesicle-mediated transport
orf19.1387	1.075	0.373	0.823	0.00844	0	S. cerevisiae ortholog Cfd1p has 4 iron, 4 sulfur cluster binding, has role in tRNA wobble uridine modification, iron-sulfur cluster assembly and localizes to cytoplasm
orf19.1388	0.752	0.0442	1.381	0.0014	0	Putative 66S pre-ribosomal particle component; Hap43p-induced gene; induced upon biofilm formation
orf19.1389	1.084	0.308	1.028	0.655	0	Ortholog of C. glabrata Cagl0j02200gp
orf19.139	0.97	0.755	0.821	0.0773	TRA1	Subunit of the NuA4 histone acetyltransferase complex
orf19.1390	0.977	0.855	0.82	0.0287	PMI1	Phosphomannose isomerase; cell wall biosynthesis enzyme; drug target; functional homolog of S. cerevisiae and E. coli phosphomannose isomerase; Gcn4p-regulated; repressed by 3-AT; induced on adherence to polystyrene, phagocytosis
orf19.1391	1.025	0.671	0.745	0.203	0	Hap43p-repressed gene
orf19.1392	1.248	0.0415	0.789	0.0285	0	S. cerevisiae ortholog Eps1p has unfolded protein binding, protein disulfide isomerase activity, chaperone binding and has role in ER-associated protein catabolic process, protein retention in ER lumen
orf19.1393	0.96	0.697	0.977	0.665	0	S. cerevisiae ortholog Yia6p has NAD transporter activity, pyruvate secondary active transmembrane transporter activity, has role in mitochondrial pyruvate transport, NAD transport and localizes to mitochondrion
orf19.1394	1.073	0.364	0.928	0.233	0	Putative protein of unknown function; protein not essential for viability; protein level decreases in stationary phase cultures
orf19.1395	1.097	0.518	0.84	0.0343	0	S. cerevisiae ortholog Pic2p has inorganic phosphate transmembrane transporter activity, has role in phosphate transport, transmembrane transport and localizes to mitochondrion
orf19.1396	1.015	0.903	0.812	0.0446	0	0
orf19.1397	0.92	0.302	0.93	0.429	0	0
orf19.14	1.613	no replicates	0.959	no replicates	#N/A	#N/A
orf19.140	0.436	no replicates	0.486	no replicates	#N/A	#N/A
orf19.1400	0.878	0.203	0.97	0.548	0	0
orf19.1401	0.814	0.0927	1.042	0.655	EAP1	Cell wall adhesin required for cell-cell adhesion and biofilm formation; GPI anchored; Efg1p-regulated; suppresses polystyrene or cell adhesion, filamentation, invasive growth defects of S. cerevisiae flo8 or flo11 mutant; biofilm-induced
orf19.1402	0.98	0.652	0.986	0.778	CCT2	Chaperonin of the cytosolic TCP1 ring complex; protein present in exponential and stationary-phase yeast cells, but higher amounts in stationary phase
orf19.1403	0.919	0.398	0.926	0.122	0	S. cerevisiae ortholog Sal1p has ATP:ADP antiporter activity, calcium ion binding, has role in ATP transport, ADP transport, mitochondrial transport and localizes to mitochondrion
orf19.1404	0.738	0.0408	1.141	0.06	0	S. cerevisiae ortholog Dus1p has tRNA dihydrouridine synthase activity, has role in tRNA modification and localizes to nucleus
orf19.1405	1.124	0.372	1.09	0.169	PHO13	Putative 4-nitrophenylphosphatase; Hap43p-repressed gene; transcription is regulated upon yeast-hyphal switch
orf19.1406	0.949	0.684	0.67	0.000775	0	0
orf19.1407	1.505	no replicates	0.624	no replicates	#N/A	#N/A
orf19.1408	NO DATA	NO DATA	NO DATA	NO DATA	#N/A	#N/A
orf19.1409	0.872	0.244	0.874	0.0146	VAC7	Protein similar to S. cerevisiae Fab1p, an enzyme regulator involved in phospholipid metabolism; not essential for viability
orf19.1409.1	NO DATA	NO DATA	NO DATA	NO DATA	0	S. cerevisiae ortholog Rpl22bp has structural constituent of ribosome, has role in translation and localizes to cytosolic large ribosomal subunit
orf19.1409.2	NO DATA	NO DATA	NO DATA	NO DATA	0	0
orf19.1409.3	NO DATA	NO DATA	NO DATA	NO DATA	0	0
orf19.141	NO DATA	NO DATA	NO DATA	NO DATA	#N/A	#N/A
orf19.1411	0.948	0.69	1.183	0.0153	0	Hap43p-repressed gene
orf19.1412	0.949	0.491	1.057	0.32	0	0
orf19.1413	1.098	0.387	1	0.997	YFH1	Frataxin; may be required for iron storage or delivery; role in oxidative stress resistance; transcription regulated by Nrg1p, repressed if iron absent, induced by macrophage interaction; Hap43p-repressed gene
orf19.1414	1.147	0.215	0.922	0.307	0	Protein of unknown function, transcription is upregulated in an RHE model of oral candidiasis; Hap43p-repressed gene
orf19.1415	1.07	0.562	1.077	0.435	FRE10	Major cell-surface ferric reductase under low-iron conditions; 7 transmembrane regions and a secretion signal predicted; repressed by Tup1p, Rim101p, Ssn6p, Hog1p, caspofungin; ciclopirox olamine induced; not required for filamentous growth
orf19.1416	1.2	0.123	1.235	0.0399	COX11	Cytochrome oxidase assembly protein; transcription is regulated by Nrg1p; transcription is upregulated in both intermediate and mature biofilms; protein repressed during the mating process; Hap43p-repressed gene
orf19.1417	1.307	0.06	1.345	0.00987	0	0
orf19.1418	1.012	0.873	1.004	0.974	SEC15	Predicted exocyst subunit; cellular bud tip-associated protein; ortholog of S. cerevisiae SEC15
orf19.1419	0.688	no replicates	0.796	no replicates	#N/A	#N/A
orf19.1420	1.025	0.808	0.95	0.61	0	Ortholog of S. cerevisiae Irc6p
orf19.1421	2.644	0.0107	1.318	0.0498	0	S. cerevisiae ortholog Dal3p has ureidoglycolate hydrolase activity
orf19.1422	1.012	0.918	0.947	0.388	FZO1	Putative mitochondrial biogenesis protein; fungal-specific (no human or murine homolog)
orf19.1424	1.258	0.118	1.022	0.772	0	Predicted membrane transporter, member of the oxalate:formate antiporter (OFA) family, major facilitator superfamily (MFS)
orf19.1426	1.039	0.703	0.921	0.239	0	0
orf19.1427	0.897	0.461	0.934	0.245	0	Putative transporter; fungal-specific (no human or murine homolog)
orf19.1428	0.903	0.353	1.089	0.343	DUO1	Subunit of the Dam1 (DASH) complex, which acts in chromosome segregation by coupling kinetochores to spindle microtubules
orf19.1429	1.177	0.141	0.941	0.516	SOH1	Putative RNA polymerase II mediator complex subunit; cell-cycle regulated periodic mRNA expression
orf19.1430	1.105	no replicates	0.863	0.713	0	0
orf19.1431	0.58	no replicates	0.831	no replicates	#N/A	#N/A
orf19.1432	0.728	no replicates	0.724	no replicates	#N/A	#N/A
orf19.1433	1.089	0.496	0.989	0.891	0	Hap43p-repressed gene; shows colony morphology-related gene regulation by Ssn6p; planktonic growth-induced gene
orf19.1433.1	NO DATA	NO DATA	NO DATA	NO DATA	0	ORF added to Assembly 21 based on comparative genome analysis; overlaps orf19.1433.2, which is annotated as a blocked reading frame
orf19.1433.2	NO DATA	NO DATA	NO DATA	NO DATA	0	Region annotated in Assembly 21 as a blocked reading frame, based on comparative genome analysis; overlaps orf19.1433.1, which is an open reading frame
orf19.1434	1.197	0.423	0.924	0.114	0	Ortholog of S. cerevisiae Dpb11p
orf19.1435	0.993	no replicates	0.935	no replicates	TEF1	Translation elongation factor 1-alpha, detected at the cell surface; binds human plasminogen; macrophage/pseudohyphal-induced; upregulated in RHE model of oral candidiasis and in clinical oral candidiasis isolates; possibly essential gene
orf19.1437	NO DATA	NO DATA	1.135	no replicates	#N/A	#N/A
orf19.1438	0.79	0.295	1.063	0.509	0	0
orf19.1439	0.934	0.463	0.919	0.177	IPK1	S. cerevisiae ortholog Ipk1p has inositol pentakisphosphate 2-kinase activity, has role in nuclear-transcribed mRNA catabolic process, non-stop decay, inositol phosphate biosynthetic process and localizes to nucleus
orf19.144	0.88	0.0612	1.069	0.0773	SNU114	Protein similar to S. cerevisiae Snu114p, which is an RNA helicase involved in pre-mRNA splicing; likely to be essential for growth, based on an insertional mutagenesis strategy
orf19.1440	1.167	0.499	0.956	0.518	0	0
orf19.1440.1	NO DATA	NO DATA	NO DATA	NO DATA	0	0
orf19.1440.2	NO DATA	NO DATA	NO DATA	NO DATA	0	0
orf19.1441	0.804	0.0605	1.03	0.64	0	0
orf19.1442	0.405	0.0128	0.81	0.0313	PLB4.5	Putative phospholipase B; Hog1p-induced; regulated by Ssn6p; putative GPI-anchor; repressed during cell wall regeneration; clade-associated gene expression; Hap43p-induced gene
orf19.1443	0.255	no replicates	0.858	no replicates	#N/A	#N/A
orf19.1444	1.134	0.25	0.847	0.0189	0	S. cerevisiae ortholog Ent1p has role in actin cortical patch assembly, actin filament organization, endocytosis and localizes to mating projection tip
orf19.1445	1.27	0.281	0.975	0.685	ESC4	Protein similar to S. cerevisiae Esc4p, which represses transposition; transposon mutation affects filamentous growth
orf19.1446	0.908	0.277	1.062	0.0987	CLB2	B-type mitotic cyclin (cyclin-dependent protein kinase regulatory subunit); essential; required for wild-type mitotic exit; role in cell polarization; interacts with catalytic subunit Cdk1p
orf19.1447	0.902	0.226	0.91	0.0616	0	0
orf19.1448	0.935	0.397	1.178	0.0455	APT1	Adenine phosphoribosyltransferase; flucytosine induced; repressed by nitric oxide; protein level decreased in stationary phase yeast cultures
orf19.1448.1	NO DATA	NO DATA	NO DATA	NO DATA	0	S. cerevisiae ortholog Dyn2p has role in microtubule-based process, actin filament-based process, nuclear pore complex assembly and localizes to nuclear pore, peroxisome
orf19.1449	0.658	0.604	0.775	0.258	0	Putative protein of unknown function; increased transcription is observed in an azole-resistant strain that overexpresses MDR1; protein present in exponential and stationary growth phase yeast cultures
orf19.145	0.844	0.119	1.155	0.0548	RPB4	Protein similar to S. cerevisiae Rpb4p, which is a component of RNA polymerase II; transposon mutation affects filamentous growth
orf19.1450	0.772	0.21	1.168	0.0847	0	0
orf19.1451	0.986	0.887	1.022	0.753	SRB9	Protein with similarity to S. cerevisiae Srb9p transcription mediator; transposon mutation affects filamentous growth; suppresses S. cerevisiae diploid filamentous (flo8, ste7, ste12, tec1) or haploid invasive (flo8) mutant growth defects
orf19.1453	0.991	0.903	0.969	0.717	SPT5	Protein similar to S. cerevisiae Spt5p transcription elongation factor; transposon mutation affects filamentous growth
orf19.1456	0.707	0.567	NO DATA	NO DATA	0	0
orf19.1457	0.91	0.257	1.095	0.219	0	Putative RNA polymerase transcription factor TFIIH core component; possibly an essential gene, disruptants not obtained by UAU1 method
orf19.1458	0.973	0.748	1.182	0.0574	0	S. cerevisiae ortholog Tad2p has tRNA-specific adenosine deaminase activity, has role in tRNA modification and localizes to nucleus, cytoplasm
orf19.1459	1.149	0.201	0.823	0.0893	PPE1	Protein similar to S. cerevisiae Ppe1p; shows genetic interaction with some genes involved in diploid filamentous growth and haploid invasive growth in S. cerevisiae
orf19.146	0.642	no replicates	0.865	no replicates	#N/A	#N/A
orf19.1460	1.118	0.19	0.934	0.375	0	Putative glutamine-dependent NAD synthetase, involved in NAD salvage pathway
orf19.1461	1.067	0.268	0.802	0.0664	0	Predicted ORF in Assemblies 19, 20 and 21; possibly transcriptionally regulated upon hyphal formation
orf19.1462	0.858	0.174	1.021	0.764	SMP2	Putative Mg2+-dependent phosphatidate phosphatase; transcription is regulated by Nrg1p
orf19.1464	1.19	0.137	0.785	0.0139	BMT5	Putative beta-mannosyltransferase, member of a 9-gene family that includes characterized genes BMT1, BMT2, BMT3, and BMT4 with roles in beta-1,2-mannosylation of cell wall phosphopeptidomannan
orf19.1465	0.955	0.695	0.968	0.658	0	0
orf19.1466	0.738	0.0287	1.275	0.00195	REX2	Putative 3'-5' RNA exonuclease with a predicted role in 3'-end processing of U4 and U5 snRNAs, 5S and 5.8S rRNAs; transcription is upregulated in both intermediate and mature biofilms
orf19.1467	0.943	0.652	1.175	0.0398	COX13	Cytochrome c oxidase; flucytosine induced; repressed by nitric oxide
orf19.1468	1.185	0.301	0.902	0.178	0	S. cerevisiae ortholog Cdc55p has role in cell shape checkpoint, pseudohyphal growth, negative regulation of exit from mitosis, mitotic cell cycle spindle assembly checkpoint, regulation of translation
orf19.1469	0.5	no replicates	1.866	no replicates	#N/A	#N/A
orf19.147	0.945	0.67	0.86	0.216	YAK1	Predicted serine-threonine protein kinase involved in hyphal growth regulation and biofilm formation; biofilm-induced; induced in core caspofungin response
orf19.1470	0.933	0.405	1.034	0.496	RPS26A	Predicted ribosomal protein; regulated by Nrg1p, Tup1p; genes encoding cytoplasmic ribosomal subunits, translation factors and tRNA synthetases are downregulated upon phagocytosis by murine macrophage; alternatively spliced intron in 5'-UTR
orf19.1471	1.124	0.546	0.942	0.439	COX4	Putative cytochrome c oxidase subunit IV; transcription is regulated by Mig1p; macrophage/pseudohyphal-induced gene; macrophage-induced protein; repressed by nitric oxide; intron in 5'-UTR; Hap43p-repressed
orf19.1473	0.945	0.879	NO DATA	NO DATA	0	Hap43p-repressed gene; transcription is induced in response to alpha pheromone in SpiderM medium
orf19.1474	1.014	0.868	0.831	0.00484	SLA1	Protein required for assembly of the cortical actin cytoskeleton; contains three SH3 domains; transcription is regulated by Nrg1p and Mig1p; fungal-specific (no human or murine homolog)
orf19.1476	0.92	0.842	1.136	0.59	0	S. cerevisiae ortholog Ime4p has mRNA (N6-adenosine)-methyltransferase activity and has role in meiosis, mRNA methylation
orf19.1477	1.36	0.00497	0.907	0.142	0	Putative protein of unknown function; Hap43p-repressed gene; S. cerevisiae ortholog YGL010W localizes to the endoplasmic reticulum
orf19.1478	0.973	0.81	0.828	0.0123	STT3	Putative oligosaccharyltransferase complex component
orf19.1479	0.976	0.76	0.84	0.00752	0	0
orf19.148	1.018	no replicates	0.62	no replicates	#N/A	#N/A
orf19.1480	1.07	0.526	0.959	0.317	0	Putative succinate dehydrogenase, enzyme of citric acid cycle; downregulated by Efg1p; repressed by nitric oxide; Hap43p-repressed gene
orf19.1481	0.938	0.622	0.924	0.282	HAP42	Predicted ORF in Assemblies 19, 20 and 21; possibly an essential gene, disruptants not obtained by UAU1 method
orf19.1482	1.068	0.543	1.082	0.208	HSK3	Subunit of the Dam1 (DASH) complex, which acts in chromosome segregation by coupling kinetochores to spindle microtubules; expression regulated during planktonic growth
orf19.1483	1.063	0.461	1.231	0.0168	0	0
orf19.1484	0.879	0.121	1.182	0.00757	0	Hap43p-induced gene
orf19.1485	0.9	0.5	1.236	0.123	0	S. cerevisiae ortholog Mrpl31p has structural constituent of ribosome and localizes to mitochondrial large ribosomal subunit
orf19.1486	0.83	0.0394	0.906	0.214	0	Late-stage biofilm-induced gene
orf19.1487	1.306	no replicates	3.661	no replicates	#N/A	#N/A
orf19.1488	0.909	0.308	1.161	0.0724	0	0
orf19.149	1.414	0.479	1.079	0.898	0	Predicted ORF in Assemblies 19, 20 and 21; transcription detected in high-resolution tiling array experiments
orf19.1490	0.958	0.706	0.774	0.000198	MSB2	Adhesin-like protein; mucin family; cell wall damage sensor; N-terminal secretion signal; required for Cek1p phosphorylation in response to cell wall stress; Rim101p-repressed; activation releases extracellular domain into medium
orf19.1490.1	NO DATA	NO DATA	NO DATA	NO DATA	0	Predicted ORF in retrotransposon Tca16 with similarity to the Gag-Pol region of retrotransposons; added to Assembly 21 based on comparative genome analysis; overlaps orf19.1490.2, which is annotated as blocked reading frame
orf19.1490.2	NO DATA	NO DATA	NO DATA	NO DATA	0	Predicted ORF in retrotransposon Tca16 with similarity to the Gag-Pol region of retrotransposons; annotated in Assembly 21 as a blocked reading frame, based on comparative genome analysis; overlaps an open reading frame orf19.1490.1
orf19.1491	0.793	0.0225	1.068	0.372	0	S. cerevisiae ortholog Snu71p has RNA binding, has role in nuclear mRNA splicing, via spliceosome and localizes to U1 snRNP, U2-type prespliceosome
orf19.1492	0.872	0.0574	1.123	0.0929	PRP39	Putative component of the U1 snRNP, involved in splicing; ortholog of S. cerevisiae PRP39; Hap43p-induced gene
orf19.1493	1.391	0.0433	0.88	0.0947	RAD7	Protein similar to S. cerevisiae Rad7p, which is a subunit of the Nucleotide Excision Repair Factor 4; induced under hydroxyurea treatment
orf19.1494	0.97	0.654	0.857	0.0042	RAD23	S. cerevisiae ortholog Rad23p has role in ER-associated protein catabolic process, protein deglycosylation
orf19.1495	0.947	0.601	1.023	0.674	0	S. cerevisiae ortholog Utr4p has role in L-methionine salvage from methylthioadenosine and localizes to nucleus, cytoplasm
orf19.1496	1.327	0.0377	1.232	0.0637	0	Putative transcription factor with zinc finger DNA-binding motif; Hap43p-repressed gene
orf19.1497	1.748	0.00713	0.916	0.561	ZCF6	Putative transcription factor with zinc cluster DNA-binding motif
orf19.1499	0.907	0.407	0.781	0.00853	CTF1	Putative zinc-finger transcription factor, similar to A. nidulans FarA and FarB; activates genes required for fatty acid degradation; induced by oleate; null mutant displays carbon source utilization defects and slightly reduced virulence
orf19.15	NO DATA	NO DATA	NO DATA	NO DATA	#N/A	#N/A
orf19.150	0.975	0.836	1.043	0.363	0	S. cerevisiae ortholog Tim17p has protein channel activity, has role in protein import into mitochondrial matrix and localizes to mitochondrial inner membrane presequence translocase complex
orf19.1500	1.097	0.41	0.966	0.695	0	0
orf19.1502	0.882	0.0658	0.953	0.199	0	0
orf19.1504	0.983	0.813	0.844	0.0332	0	Putative patatin-like phospholipase; fungal-specific (no human or murine homolog)
orf19.1505	0.82	0.0929	0.829	0.00288	0	0
orf19.1506	1.095	0.814	1.42	no replicates	0	0
orf19.1507	0.702	0.0777	0.786	0.00998	0	Putative negative regulator of exit from mitosis; Plc1p-regulated
orf19.1508	0.823	0.322	0.899	0.367	0	Predicted ORF in Assemblies 19, 20 and 21; transcription detected in high-resolution tiling array experiments
orf19.1509	0.941	0.58	0.985	0.826	ROD1	Protein not essential for viability; similar to S. cerevisiae Rod1p, which is a membrane protein with a role in drug tolerance; repressed by Rgt1p
orf19.151	0.991	0.94	0.977	0.758	TPO5	Putative polyamine transporter; mutation confers hypersensitivity to toxic ergosterol analog; hyphal induced; macrophage induced
orf19.1510	0.997	0.973	0.898	0.16	SDF1	Protein not essential for viability
orf19.1513	1.101	0.262	0.877	0.0581	FAB1	Phosphatidylinositol 3-phosphate 5-kinase; required for hyphal growth on solid media, and for wild-type vacuolar morphology and acidification; not required for wild-type virulence in mouse systemic infection or for adherence to HeLa cells
orf19.1514	0.979	0.843	0.982	0.695	0	S. cerevisiae ortholog Vps74p has role in protein localization in Golgi apparatus, retrograde vesicle-mediated transport, Golgi to ER, endoplasmic reticulum unfolded protein response
orf19.1515	1.622	0.126	0.747	0.307	CHT4	Chitinase; similar to S. cerevisiae sporulation-specific Cts2p; functionally complements A. gossypii cts2 mutant sporulation defect; homozygous null mutation causes no obvious defects; transcription decreases upon yeast-to-hyphal switch
orf19.1516	1.147	0.173	0.738	0.000672	0	S. cerevisiae ortholog Ubp14p has ubiquitin-specific protease activity and has role in proteasomal ubiquitin-dependent protein catabolic process, negative regulation of gluconeogenesis
orf19.1517	0.955	0.671	0.902	0.165	ARO3	3-deoxy-D-arabinoheptulosonate-7-phosphate synthase; aromatic amino acid biosynthesis; GCN-regulated; feedback-inhibited by phenylalanine if expressed in S. cerevisiae; Aro3p and Aro4p catalyze same reaction; decreased in stationary phase
orf19.1519	1.058	0.678	0.963	0.599	0	Hap43p-repressed gene
orf19.1522	1.409	0.095	1.345	0.0064	0	0
orf19.1523	1.015	0.951	0.81	0.516	FMO1	Putative oxidoreductase; mutation confers hypersensitivity to toxic ergosterol analog, and to amphotericin B
orf19.1524	2.121	0.125	0.401	0.116	SPR3	Septin; mutant has no obvious phenotype
orf19.1525	0.926	0.0693	0.891	0.0465	0	S. cerevisiae ortholog Nmd4p has role in nuclear-transcribed mRNA catabolic process, nonsense-mediated decay and localizes to cytoplasm
orf19.1526	0.931	0.365	0.904	0.0611	SNF2	Protein involved in transcriptional regulation; ortholog of S. cerevisiae Snf2p, which is the catalytic subunit of the SWI/SNF chromatin remodeling complex; interacts with Swi1p; SWI/SNF complex is essential for hyphal growth and virulence
orf19.1527	1.119	0.686	0.906	0.399	0	0
orf19.1528	0.892	0.263	0.992	0.83	0	Putative mitochondrial RNA polymerase specificity factor; possibly an essential gene, disruptants not obtained by UAU1 method
orf19.1529	0.855	0.618	1.222	0.26	0	Predicted ORF in Assemblies 19, 20 and 21; macrophage-induced gene
orf19.153	0.919	no replicates	0.98	no replicates	#N/A	#N/A
orf19.1530	2.462	0.55	0.01*	no replicates	0	0
orf19.1531	1.054	0.511	1.054	0.749	0	S. cerevisiae ortholog Rna14p has RNA binding, protein heterodimerization activity, has role in mRNA cleavage, mRNA polyadenylation and localizes to mitochondrion, mRNA cleavage factor complex
orf19.1532	0.854	0.0837	1.147	0.056	0	0
orf19.1533	0.982	0.862	1.02	0.726	0	Hap43p-induced gene; S. cerevisiae ortholog YKL077W localizes to fungal-type vacuole
orf19.1534	1.304	0.0516	0.986	0.869	0	Protein similar to S. cerevisiae Zrt3p, which is a transporter of zinc ions; predicted Kex2p substrate; late-stage biofilm-induced gene
orf19.1535	0.967	0.682	0.847	0.0877	0	Hap43p-induced gene
orf19.1536	0.876	0.123	0.961	0.497	0	Putative vacuolar transporter; Hap43p-induced gene, required for normal filamentous growth; mRNA binds to She3p and is localized to hyphal tips
orf19.1537	0.91	no replicates	0.893	no replicates	#N/A	#N/A
orf19.1538	0.967	0.743	0.968	0.698	TLG2	Putative syntaxin-like t-SNARE; macrophage/pseudohyphal-repressed
orf19.1539	1.257	0.443	1.645	0.0483	0	Predicted ORF in Assemblies 19, 20 and 21; highly induced upon biofilm formation
orf19.154	0.729	0.00703	1.225	0.0193	0	Hap43p-induced gene; S. cerevisiae ortholog UTP30, a U3-containing 90S preribosome complex protein
orf19.1541	0.995	0.994	1.042	0.922	0	Protein not essential for viability; transcription is repressed in response to alpha pheromone in SpiderM medium
orf19.1542	0.946	0.607	0.984	0.832	HEX3	Protein similar to S. cerevisiae Hex3p, which is involved in DNA damage response; transposon mutation affects filamentous growth
orf19.1543	0.938	0.507	0.749	0.0189	OPI1	Functional homolog of S. cerevisiae Opi1p, which is a transcriptional repressor of INO1 involved in inositol biosynthesis; has leucine zipper and putative Opi1-Sin3 interaction domain; interacts with ScSin3p, but not CaSin3p
orf19.1544	1.069	0.544	0.854	0.0371	0	0
orf19.1545	0.876	0.227	1.175	0.0609	0	S. cerevisiae ortholog Mrps8p has structural constituent of ribosome and localizes to mitochondrial small ribosomal subunit
orf19.1546	1.252	0.0304	1.121	0.148	0	Membrane-localized protein
orf19.1547	1.018	0.774	1.077	0.4	0	S. cerevisiae ortholog Tpp1p has polynucleotide 3'-phosphatase activity and has role in DNA repair
orf19.1548	0.885	0.258	1.172	0.0267	0	S. cerevisiae ortholog Snu23p has role in nuclear mRNA splicing, via spliceosome and localizes to U4/U6 x U5 tri-snRNP complex
orf19.1549	0.881	0.194	0.921	0.115	0	Plasma membrane-associated protein identified in detergent-resistant membrane fraction (possible lipid raft component); repressed by nitric oxide; predicted transmembrane helix
orf19.155	0.999	0.984	0.869	0.0711	URE2	Functional homolog of S. cerevisiae Ure2p, which is a regulator of nitrogen utilization, and which also has an infectious prion form called [URE3]; forms [URE3] prion when expressed in S. cerevisiae
orf19.1551	1.244	0.179	1.651	0.654	0	Predicted ORF in Assemblies 19, 20 and 21; overlaps CPR3/orf19.1552
orf19.1552	1.072	0.364	1.027	0.533	CPR3	Putative peptidyl-prolyl cis-trans isomerase; macrophage-induced protein; protein levels decrease in stationary phase yeast cultures; predicted mitochondrial localization; overlaps orf19.1551
orf19.1553	0.991	0.934	0.91	0.273	ENT3	Putative epsin; induced during the mating process; transcription is upregulated in an RHE model of oral candidiasis
orf19.1555	0.984	0.807	1.011	0.918	SAC3	Putative nuclear pore-associated protein, required for small ribosomal subunit biogenesis; possibly an essential gene, disruptants not obtained by UAU1 method
orf19.1556	0.854	no replicates	1.131	no replicates	#N/A	#N/A
orf19.1557	0.895	0.33	0.959	0.419	0	S. cerevisiae ortholog Rkm5p has S-adenosylmethionine-dependent methyltransferase activity and has role in protein methylation
orf19.1559	1.011	0.861	0.916	0.0414	HOM2	Aspartate-semialdehyde dehydrogenase; forms a homodimer; conserved in bacteria, archaea, and fungi but not in mammals; ketoconazole-repressed; protein present in exponential and stationary growth phase yeast cultures
orf19.156	1.049	0.675	0.888	0.248	FGR51	Protein lacking an ortholog in S. cerevisiae; transposon mutation affects filamentous growth; Hap43p-repressed gene
orf19.1560	1.041	0.621	0.913	0.101	POB3	Protein similar to S. cerevisiae Pob3p, which is involved in chromatin assembly and disassembly; transposon mutation affects filamentous growth
orf19.1562	0.707	0.105	0.811	0.00738	0	Late-stage biofilm-induced gene; transcription is repressed in response to alpha pheromone in SpiderM medium
orf19.1563	0.753	0.033	0.882	0.0975	ECM3	S. cerevisiae ortholog Ecm3p has role in fungal-type cell wall organization and localizes to endoplasmic reticulum
orf19.1564	1.374	0.0216	0.98	0.712	0	Plasma membrane-localized protein of unknown function
orf19.1565	0.843	0.12	1.234	0.00463	0	Putative transcription factor with zinc finger DNA-binding motif
orf19.1566	0.679	0.0569	1.061	0.295	UTP21	Putative U3 snoRNP protein; Hap43p-induced gene; physically interacts with TAP-tagged Nop1p
orf19.1567	0.844	0.113	0.998	0.979	0	0
orf19.1568	0.979	no replicates	1.337	no replicates	#N/A	#N/A
orf19.1569	0.708	0.00493	0.957	0.215	UTP22	Putative U3 snoRNP protein; expression downregulated in an ssr1 null mutant; decreased expression in response to prostaglandins; heterozygous null mutant exhibits resistance to parnafungin
orf19.157	1.576	no replicates	0.964	no replicates	#N/A	#N/A
orf19.1570	1.002	0.979	0.677	0.00177	ERG7	2,3-epoxysqualene-lanosterol cyclase (lanosterol synthase), catalyzes the conversion of 2,3-oxidosqualene to lanosterol in sterol biosynthesis; fluconazole-induced; possibly an essential gene, disruptants not obtained by UAU1 method
orf19.1571	0.967	0.871	1.017	0.939	ATO7	Putative fungal-specific transmembrane protein
orf19.1572	0.384	no replicates	0.477	no replicates	#N/A	#N/A
orf19.1573	1.079	0.507	1	0.998	0	S. cerevisiae ortholog Ypk9p localizes to fungal-type vacuole membrane
orf19.1574	0.898	0.154	0.94	0.185	0	Predicted ORF in Assemblies 19, 20 and 21; possibly an essential gene, disruptants not obtained by UAU1 method
orf19.1575	0.761	0.0158	0.99	0.843	PRS1	Phosphoribosylpyrophosphate synthetase; enzyme of purine, pyrimidine, histidine, and tryptophan biosynthesis; essential; flucytosine induced; macrophage/pseudohyphal-induced
orf19.1576	0.989	0.902	0.876	0.0851	0	S. cerevisiae ortholog Etp1p has ubiquitin binding, nuclear localization sequence binding and has role in response to ethanol
orf19.1577	2.475	0.232	1.866	no replicates	0	0
orf19.1578	0.704	0.00985	1.149	0.0234	0	Hap43p-induced gene
orf19.158	1.078	0.221	1.458	0.00415	0	Hap43p-induced gene; similar to S. cerevisiae Apd1p, a protein required for normal localization of actin patches and for normal tolerance of sodium ions and hydrogen peroxide
orf19.1580	0.855	0.471	1.025	0.767	0	0
orf19.1581	0.505	0.499	0.343	0.4	0	Planktonic growth-induced gene
orf19.1582	0.991	0.979	0.679	0.295	0	Predicted membrane transporter, member of the drug:proton antiporter (12 spanner) (DHA1) family, major facilitator superfamily (MFS); mRNA binds to She3p
orf19.1583	NO DATA	NO DATA	NO DATA	NO DATA	#N/A	#N/A
orf19.1584	1.023	0.731	0.895	0.25	0	Predicted membrane transporter, member of the monocarboxylate porter (MCP) family, major facilitator superfamily (MFS); shows colony morphology-related gene regulation by Ssn6p; late-stage biofilm-induced gene
orf19.1585	1.648	0.147	0.966	0.583	ZRT2	Putative zinc transporter; ciclopirox olamine, fluconazole, and alkaline downregulated; transcriptionally induced by interaction with macrophages; amphotericin B induced; possibly an essential gene, disruptants not obtained by UAU1 method
orf19.1586	1.287	no replicates	0.904	no replicates	FGR22	Putative phosphatidylinositol-specific phospholipase C (PI-PLC); predicted type 2 membrane protein; no S. cerevisiae ortholog; role in, and regulated by, filamentation, Hap43p; almost identical to orf19.5797
orf19.1587	0.752	0.132	0.899	0.114	HGT20	Putative glucose transporter of the major facilitator superfamily; the C. albicans glucose transporter family comprises 20 members; 12 probable membrane-spanning segments; regulated by Nrg1p
orf19.1588	1.191	0.141	0.994	0.892	0	S. cerevisiae ortholog Fmp21p localizes to mitochondrion
orf19.1589	0.85	0.244	0.938	0.61	0	Putative DNA-binding transcription factor
orf19.1589.1	NO DATA	NO DATA	NO DATA	NO DATA	0	0
orf19.159	0.855	no replicates	0.84	no replicates	#N/A	#N/A
orf19.1590	0.78	0.147	1.149	0.0706	0	0
orf19.1591	0.778	0.0769	0.753	4.3e-06	ERG10	Putative acetyl-CoA acetyltransferase; role in ergosterol biosynthesis; soluble in hyphae; changes in protein abundance associated with azole resistance; fluconazole or ketoconazole induced; macrophage-downregulated protein
orf19.1592	1.036	0.519	0.933	0.258	0	Ortholog of C. glabrata Cagl0l12628gp
orf19.1593	0.974	no replicates	0.988	no replicates	#N/A	#N/A
orf19.1594	3.2	no replicates	0.667	no replicates	#N/A	#N/A
orf19.1595	1.041	0.586	0.844	0.0182	0	S. cerevisiae ortholog Ubx3p localizes to cytoplasm
orf19.1596	0.616	0.101	0.833	0.274	FGR28	Protein lacking an ortholog in S. cerevisiae; transposon mutation affects filamentous growth; possibly an essential gene, disruptants not obtained by UAU1 method
orf19.1597	1.112	0.207	0.925	0.175	ABG1	Vacuolar membrane protein of yeast and hyphae; depletion causes abnormal vacuolar morphology, cell separation defect, sensitivity to cell wall perturbation, increased hyphal branching; essential gene, no mammalian homolog; Cyr1p-regulated
orf19.1598	0.887	0.229	0.797	0.0181	ERG24	C-14 sterol reductase, has a role in ergosterol biosynthesis; mutation confers increased sensitivity to dyclonine
orf19.1599	1.556	0.248	1.495	no replicates	0	0
orf19.16	0.606	no replicates	NO DATA	NO DATA	#N/A	#N/A
orf19.160	0.784	no replicates	0.479	no replicates	#N/A	#N/A
orf19.1600	0.912	0.324	0.945	0.526	0	0
orf19.1601	0.875	0.169	0.898	0.0154	RPL3	Putative ribosomal protein, large subunit; induced by ciclopirox olamine treatment; genes encoding cytoplasmic ribosomal subunits are downregulated upon phagocytosis by murine macrophages; Hap43p-induced gene
orf19.1604	0.869	0.214	0.852	0.0429	0	Protein with a Gal4p-like DNA-binding domain
orf19.1605	1.164	0.275	0.857	0.182	PMS1	Putative DNA mismatch repair factor; ortholog of S. cerevisiae PMS1 which is an ATP-binding protein involved in DNA mismatch repair
orf19.1606	1.154	0.133	0.82	0.0236	0	Predicted ORF in Assemblies 19, 20 and 21; Plc1p-regulated
orf19.1607	0.964	0.703	1.073	0.263	ALR1	Putative transporter of divalent cations; hyphal-induced expression; fungal-specific (no human or murine homolog)
orf19.1608	1.183	0.475	0.599	0.000503	0	0
orf19.1609	0.757	0.03	1.16	0.00791	0	S. cerevisiae ortholog Kri1p has role in endonucleolytic cleavage in ITS1 to separate SSU-rRNA from 5.8S rRNA and LSU-rRNA from tricistronic rRNA transcript (SSU-rRNA, 5.8S rRNA, LSU-rRNA) and localizes to nucleolus
orf19.1610	0.909	0.478	0.851	0.0291	0	Putative protein of unknown function, transcription is activated in the presence of elevated CO2
orf19.1611	0.848	0.112	1.275	0.00964	0	0
orf19.1613	1.098	0.391	1.021	0.662	ILV2	Putative acetolactate synthase; regulated by Gcn4p; induced by amino acid starvation (3-AT treatment); stationary phase enriched protein
orf19.1614	1.143	0.199	1.001	0.992	MEP1	Ammonium permease; Mep1p is more efficient ammonium permease than Mep2p, whereas Mep2p has additional regulatory role; 11 predicted transmembrane regions; low mRNA abundance; hyphal downregulated; late-stage biofilm-induced
orf19.1616	1.013	0.972	0.812	0.358	FGR23	Biofilm- and planktonic growth-induced gene; transposon mutation affects filamentous growth; transcriptionally repressed by A1p and Alpha2p in white-phase cells, a-specific and induced by alpha factor; Hap43p-repressed
orf19.1617	1.012	0.898	1.073	0.448	0	Protein similar to S. cerevisiae Ydr282cp; transposon mutation affects filamentous growth; Hap43p-repressed gene
orf19.1618	0.954	0.711	1.089	0.233	GFA1	Glucosamine-6-phosphate synthase, homotetrameric enzyme of chitin/hexosamine biosynthesis; inhibited by UDP-GlcNAc, FMDP, N-acyl peptide, kanosamine-6-P; functional homolog of S. cerevisiae Gfa1p; Cagrowth-phase regulated; catalytic Cys
orf19.1618.1	NO DATA	NO DATA	NO DATA	NO DATA	0	Ortholog of S. cerevisiae Yil156w-bp
orf19.1619	0.912	0.277	0.994	0.926	0	Putative kinase subunit of RNA polymerase II carboxy-terminal domain kinase I; possibly an essential gene, disruptants not obtained by UAU1 method
orf19.162	NO DATA	NO DATA	NO DATA	NO DATA	#N/A	#N/A
orf19.1620	NO DATA	NO DATA	3.341	0.466	0	Predicted ORF in Assemblies 19, 20 and 21; transcription is induced in response to alpha pheromone in SpiderM medium
orf19.1621	1.045	0.794	0.929	0.149	GPA2	G-protein alpha subunit; regulates filamentous growth; involved in cAMP-mediated glucose signaling; reports differ on role in cAMP-PKA pathway, MAP kinase cascade; Gpr1p C terminus binds Gpa2p; regulates HWP1 and ECE1
orf19.1622	0.931	0.361	1.131	0.0799	YCG1	Putative condensin G
orf19.1623	2.11	0.000674	1.738	0.00023	CAP1	Transcription factor, AP-1 bZIP family; role in oxidative stress response and resistance, multidrug resistance; oxidative stress regulates nuclear localization; partially complements S. cerevisiae yap1 mutation; human neutrophil-ind
orf19.1624	0.883	0.143	0.917	0.173	0	S. cerevisiae ortholog Mak10p has peptide alpha-N-acetyltransferase activity, has role in N-terminal protein amino acid acetylation and localizes to NatC complex
orf19.1624.1	NO DATA	NO DATA	NO DATA	NO DATA	0	0
orf19.1625	1.044	0.681	0.95	0.344	0	Putative ubiquinone oxidoreductase; repressed by nitric oxide; Hap43p-repressed
orf19.1626	0.89	0.235	1.018	0.796	0	S. cerevisiae ortholog Dys1p has transferase activity, transferring alkyl or aryl (other than methyl) groups, has role in peptidyl-lysine modification to hypusine and localizes to cytoplasm
orf19.1628	1.354	0.103	0.665	0.00499	LAP41	Putative aminopeptidase yscI precursor; not essential for viability; protein present in exponential and stationary growth phase yeast cultures
orf19.163	1.135	0.393	1.056	0.597	0	S. cerevisiae ortholog Pan6p has pantoate-beta-alanine ligase activity, has role in pantothenate biosynthetic process and localizes to nucleus, cytoplasm
orf19.1630	0.915	0.288	0.91	0.0941	0	0
orf19.1631	0.69	0.0145	0.605	5.41e-05	ERG6	Delta(24)-sterol C-methyltransferase, converts zymosterol to fecosterol in ergosterol biosynthesis by methylating C-24; mutation confers nystatin resistance; Hap43p-, fluconazole-induced; transcription increased in azole-resistant strain
orf19.1632	1.249	0.273	0.732	0.0113	0	0
orf19.1633	0.7	0.0344	1.125	0.318	UTP4	Putative U3 snoRNA-associated protein; Hap43p-induced gene; physically interacts with TAP-tagged Nop1p
orf19.1634	1.092	0.305	0.91	0.254	0	0
orf19.1635	0.952	0.518	1.035	0.336	RPL12	Ribosomal protein L12, 60S ribosomal subunit; downregulated by human whole blood or polymorphonuclear cells; genes encoding cytoplasmic ribosomal subunits are downregulated upon phagocytosis by macrophage; Tbf1p-activated; Hap43p-induced
orf19.1636	0.831	0.146	0.963	0.429	STE50	Protein with sterile alpha motif (SAM) and Ras-associated domain (RAD); similar to S. cerevisiae Rad50p, which is involved in signal transduction via interaction with and regulation of MAPKKK
orf19.1637	1.154	0.324	0.901	0.067	0	Ortholog of C. glabrata Cagl0b01743gp
orf19.1638	1.117	0.453	0.869	0.0598	0	0
orf19.1639	0.803	0.544	1.281	0.357	0	0
orf19.164	0.869	0.211	0.761	0.036	0	S. cerevisiae ortholog Lpx1p has lipase activity and localizes to peroxisomal matrix
orf19.1640	NO DATA	NO DATA	NO DATA	NO DATA	#N/A	#N/A
orf19.1641	1.108	0.547	1.572	0.0033	0	0
orf19.1642	0.737	0.0378	1.246	0.00498	0	Hap43p-induced gene; ortholog of S. cerevisiae LOC1, a nuclear protein involved in asymmetric localization of ASH1 mRNA in S. cerevisiae
orf19.1643	1.094	0.0667	0.944	0.173	0	S. cerevisiae ortholog Pcp1p has serine-type endopeptidase activity, has role in regulation of mitochondrion organization, signal peptide processing and localizes to mitochondrial inner membrane
orf19.1646	0.714	0.0169	1.243	0.00168	0	Ortholog of S. cerevisiae Mrd1p
orf19.1647	0.877	0.466	2.129	no replicates	0	S. cerevisiae ortholog Mum3p has role in ascospore wall assembly
orf19.1648	1.1	0.299	0.953	0.526	RAD50	Putative DNA double-strand break repair factor; involved in response to oxidative stress and drug resistance
orf19.1649	1.07	0.576	0.979	0.59	RNA1	Putative GTPase-activating protein; protein level decreases in stationary phase cultures
orf19.1650	0.919	0.316	1.297	0.00104	0	S. cerevisiae ortholog Tom6p has protein channel activity and has role in mitochondrial outer membrane translocase complex assembly, protein import into mitochondrial matrix
orf19.1651	1.154	0.705	0.893	0.792	0	0
orf19.1652	0.897	0.352	0.701	0.036	POX1-3	Predicted acyl-CoA oxidase; farnesol regulated; stationary phase enriched protein
orf19.1653	1.427	0.00518	0.995	0.948	0	0
orf19.1654	0.943	0.449	0.976	0.553	0	Predicted ORF in Assemblies 19, 20 and 21; increased expression in response to prostaglandins
orf19.1655	0.895	0.111	0.642	0.064	PXP2	Putative acyl-CoA oxidase; enzyme of fatty acid beta-oxidation; induced during macrophage infection; expression is opaque specific; has putative peroxisome targeting signal
orf19.1655.3	1.171	0.17	1.006	0.909	0	S. cerevisiae ortholog Pmp3p has role in cation transport, regulation of membrane potential and localizes to plasma membrane
orf19.1656	0.938	0.631	1.184	0.209	0	Hap43p-repressed gene
orf19.1657	0.977	no replicates	1.109	no replicates	#N/A	#N/A
orf19.1658	1.072	0.709	0.968	0.857	0	S. cerevisiae ortholog Ydr348cp localizes to mating projection tip, cellular bud neck
orf19.1659	0.981	0.742	0.969	0.335	ALG8	Putative glucosyltransferase involved in cell wall mannan biosynthesis; transcription is elevated in nik1 and sln1 homozygous null mutants, but not in the chk1 null mutant; possibly an essential gene, disruptants not obtained by UAU1 method
orf19.166	0.896	0.0184	1.092	0.0884	ASG1	Gal4p family zinc-finger transcription factor with similarity to S. cerevisiae Asg1p
orf19.1660	NO DATA	NO DATA	NO DATA	NO DATA	#N/A	#N/A
orf19.1661	0.931	0.268	1.001	0.987	DBP5	S. cerevisiae ortholog Dbp5p has RNA helicase activity, inositol hexakisphosphate binding, RNA-dependent ATPase activity and has role in mRNA export from nucleus, translational termination
orf19.1662	0.868	0.144	0.998	0.981	0	S. cerevisiae ortholog Mrp1p has structural constituent of ribosome and localizes to mitochondrial small ribosomal subunit
orf19.1663	0.918	0.376	0.833	0.00336	MNT2	Alpha-1,2-mannosyl transferase; adds third mannose during cell-wall mannoprotein biosynthesis; partially redundant with Mnt1p; role in adherence and virulence; expressed in yeast-form and hyphal cells; fungal-specific; Hap43p-induced
orf19.1664	0.874	0.34	0.898	0.0685	0	Protein of unknown function; expression downregulated in an ssr1 null mutant
orf19.1665	0.945	0.321	0.858	0.104	MNT1	Alpha-1,2-mannosyl transferase; adds second mannose during cell-wall mannoprotein biosynthesis; required for wild-type virulence and adherence to epithelial cells; predicted type II Golgi membrane protein; fungal-specific; Hap43p-induced
orf19.1666	0.901	0.286	0.934	0.377	0	Predicted ORF in Assemblies 19, 20 and 21; transcription is induced in response to alpha pheromone in SpiderM medium
orf19.1667	1.066	0.493	1.045	0.441	0	Hap43p-repressed gene
orf19.1667.1	1.089	0.622	1.365	0.015	0	Ortholog of C. glabrata Cagl0j08976gp
orf19.1668	1.077	0.495	1.053	0.495	0	Protein of unknown function; expression downregulated in an ssr1 null mutant
orf19.1669	1.033	0.741	0.839	0.012	AFG3	Similar to S. cerevisiae Afg3p, a subunit of the mitochondrial inner membrane m-AAA protease; likely to be essential for growth, based on an insertional mutagenesis strategy
orf19.167	0.766	no replicates	1.024	no replicates	#N/A	#N/A
orf19.1670	1.024	0.838	0.858	0.0493	BRO1	Protein involved in transport from multivesicular body to vacuole; similar to S. cerevisiae Bro1p, a class E vacuolar protein sorting (VPS) factor; not involved in Rim101p pathway; macrophage and pseudohyphal-repressed; biofilm-induced
orf19.1671	1.356	0.154	1.249	0.0194	UTR2	GPI anchored cell wall putative glycosidase; role in adhesion; required for hyphal growth on Spider (not serum) medium; chitin-binding, glycosyl hydrolase domains; induced during cell wall regeneration; mRNA detected in yeast-form cells
orf19.1672	0.903	0.101	0.85	0.00858	0	S. cerevisiae ortholog Cop1p has ubiquitin binding, has role in retrograde vesicle-mediated transport, Golgi to ER, ER to Golgi vesicle-mediated transport and localizes to COPI vesicle coat
orf19.1673	0.949	0.583	1.187	0.00609	PPT1	Putative serine/threonine phosphatase; transcriptionally regulated by iron; expression greater in high iron
orf19.1674	0.899	0.201	0.88	0.0352	CDC53	Cullin, a scaffold subunit of the SCF ubiquitin-ligase complexes; depletion leads to increased filamentous growth and premature cell death
orf19.1675	0.994	0.976	0.912	0.0834	0	S. cerevisiae ortholog Srf1p has role in positive regulation of catalytic activity
orf19.1676	0.845	0.147	0.956	0.296	0	S. cerevisiae ortholog Ydl183cp has role in potassium ion transport, proton transport and localizes to integral to mitochondrial inner membrane
orf19.1677	0.813	0.126	0.851	0.0467	0	Predicted ORF in Assemblies 19, 20 and 21; transcription detected in high-resolution tiling array experiments
orf19.1678	0.838	0.108	0.862	0.047	0	Predicted ORF in Assemblies 19, 20 and 21; transcription detected in high-resolution tiling array experiments
orf19.1679	1.021	0.911	1.533	0.46	0	0
orf19.168	0.764	0.0389	1.194	0.0115	0	Ortholog of S. cerevisiae Mtr3p
orf19.1680	1.002	0.977	0.836	0.0146	TFP1	Subunit of vacuolar H+-ATPase; stationary phase enriched protein; sumoylation target
orf19.1681	1.016	0.888	0.938	0.41	0	0
orf19.1682	1.138	0.466	0.898	0.0851	0	Membrane protein; Hap43p-repressed gene; repressed by nitric oxide
orf19.1683	1.335	0.0551	0.848	0.00129	PPH21	Putative protein phosphatase of the Type 2A-related family (serine/threonine-specific), similar to S. cerevisiae Pph21p; caspofungin repressed; possibly an essential gene, disruptants not obtained by UAU1 method
orf19.1684	0.857	0.241	0.955	0.552	0	0
orf19.1685	0.893	0.491	0.859	0.362	ZCF7	Predicted zinc-finger protein; null mutant displays reduced colony wrinkling on Spider medium and is unable to utilize mannitol as a carbon source
orf19.1686	1.368	0.0886	0.962	0.702	0	0
orf19.1687	0.743	0.00652	1.145	0.165	0	Hap43p-induced gene; ortholog of S. cerevisiae PRP43, an RNA helicase in the DEAH-box family that functions in both RNA polymerase I and polymerase II transcript metabolism
orf19.169	0.844	0.0929	0.901	0.116	CHO2	Putative phosphatidyl-ethanolamine N-methyltransferase; fungal-specific (no human or murine homolog); amphotericin B repressed; Hap43p-induced gene
orf19.1690	0.968	0.596	0.926	0.0942	TOS1	Protein similar to alpha agglutinin anchor subunit; secreted; exogenously expressed protein is a substrate for Kex2p processing in vitro; fluconazole-induced; induced by alpha pheromone in SpiderM medium; Hap43p-induced
orf19.1691	0.822	0.434	0.531	0.0413	0	Plasma-membrane-localized protein; filament induced; Hog1p-, ketoconazole-, fluconazole- and hypoxia-induced; regulated by Nrg1p, Tup1p, Upc2p; increased expression in response to prostaglandins; biofilm- and planktonic growth-induced
orf19.1693	0.855	0.0629	1.001	0.98	CAS4	Protein of RAM cell wall integrity signaling network; role in cell separation, azole sensitivity; required for hyphal growth; insertion mutation near 3' end of gene causes increase in caspofungin sensitivity; pheromone/hyphal induced
orf19.1694	1.151	no replicates	0.966	no replicates	#N/A	#N/A
orf19.1697	0.935	0.495	1.061	0.267	0	S. cerevisiae ortholog Tma46p has role in translation and localizes to polysomal ribosome, cytoplasm
orf19.1698	1.074	0.33	0.772	0.00661	0	S. cerevisiae ortholog App1p has role in actin cytoskeleton organization and localizes to actin cortical patch
orf19.1699	1.292	0.0328	0.771	0.00268	BZZ1	Protein similar to S. cerevisiae Bzz1p, which is an SH3 domain protein involved in the regulation of actin polymerization
orf19.17	0.971	0.637	0.857	0.00372	SCP1	Putative cortical actin cytoskeleton protein; constitutive expression independent of MTL or white-opaque status
orf19.170	0.438	no replicates	1.478	no replicates	#N/A	#N/A
orf19.1700	0.847	0.0576	0.93	0.133	RPS7A	Ribosomal protein S7; genes encoding cytoplasmic ribosomal subunits, translation factors, and tRNA synthetases are downregulated upon phagocytosis by murine macrophage
orf19.1701	0.834	0.0257	0.937	0.116	RKI1	S. cerevisiae ortholog Rki1p has ribose-5-phosphate isomerase activity, has role in pentose-phosphate shunt, pyridoxine biosynthetic process and localizes to nucleus, cytoplasm
orf19.1702	1.194	0.294	0.809	0.0101	ARF3	Transcription is filament induced; Tup1p regulated (see Locus History Note for Assembly 19 correction)
orf19.1704	0.893	0.272	0.392	0.00272	FOX3	Putative peroxisomal 3-oxoacyl CoA thiolase; expression is regulated upon white-opaque switching
orf19.1706	1.004	0.95	0.963	0.422	MET18	Putative protein with a predicted role in nucleotide excision repair (NER) and RNA polymerase II (RNAP II) transcription; Plc1p-regulated
orf19.1707	0.988	0.879	0.947	0.415	0	0
orf19.1708	0.858	0.499	1.192	0.0214	0	0
orf19.1709	1.356	0.0198	0.667	0.00737	0	Predicted ORF in Assemblies 19, 20 and 21; alkaline downregulated; shows colony morphology-related gene regulation by Ssn6p
orf19.171	0.572	0.00456	1.134	0.137	DBP2	Putative DEAD-box family ATP-dependent RNA helicase; flucytosine induced; downregulated in core stress response
orf19.1710	1.02	0.697	0.93	0.399	ALI1	Putative NADH-ubiquinone oxidoreductase; in detergent-resistant membrane fraction (possible lipid raft component); predicted N-terminal acetylation; nitric oxide-repressed; plasma membrane-localized; protein decreases in stationary phase
orf19.1711	1.045	0.757	0.968	0.719	END3	Regulated by Gcn4p; induced in response to amino acid starvation (3-aminotriazole treatment)
orf19.1712	0.931	0.581	0.981	0.705	GEA2	Putative ARF GTP/GDP exchange factor; transcriptionally regulated by iron; expression greater in low iron
orf19.1713	1.03	no replicates	0.786	no replicates	#N/A	#N/A
orf19.1714	0.737	0.0559	1.114	0.566	PGA44	Putative GPI-anchored protein
orf19.1715	1.15	0.364	0.88	0.0308	IRO1	Putative transcription factor; role in iron utilization, pathogenesis; both IRO1 and adjacent URA3 are mutated in strain CAI4; suppresses S. cerevisiae aft1 mutant low-iron growth defect; hyphal-induced; reports differ about iron regulation
orf19.1716	0.876	0.407	1.044	0.524	URA3	Orotidine-5'-phosphate decarboxylase, enzyme of pyrimidine biosynthesis; gene used as a molecular genetic marker, but decreased expression when integrated at ectopic chromosomal locations can cause defects in hyphal growth and virulence
orf19.1717	0.876	0.128	1.094	0.2	0	0
orf19.1718	0.88	0.13	1.011	0.913	ZCF8	Predicted zinc-finger protein; decreased transcription is observed upon fluphenazine treatment
orf19.1719	1.33	0.0287	1.034	0.667	SGA1	Putative glucoamylase; fungal-specific (no human or murine homolog)
orf19.172	0.709	0.159	1.486	0.00439	RPC19	Putative RNA polymerases I and III subunit AC19; Hap43p-induced gene; transcription is upregulated in both intermediate and mature biofilms
orf19.1720	0.833	0.244	1.131	0.162	0	S. cerevisiae ortholog Irc5p has role in mitotic recombination
orf19.1721	0.534	0.112	0.943	0.506	NCE103	Carbonic anhydrase involved in the conversion of CO2 to bicarbonate; essential for virulence in host niches with limited CO2, wild-type white-opaque switching; biofilm induced; activated by Mnl1p under weak acid stress; Hap43p-induced gene
orf19.1722	1.168	0.663	1.574	0.378	0	0
orf19.1723	1.195	0.209	1.312	0.0041	0	S. cerevisiae ortholog Yjl055wp has role in response to purine-containing compound and localizes to nucleus, cytoplasm
orf19.1724	1.878	0.00209	1.975	9.36e-06	0	Protein of unknown function; induced by nitric oxide independent of Yhb1p
orf19.1725	0.948	0.631	0.809	0.0356	0	Putative adhesin-like protein
orf19.1727	1.113	0.438	0.856	0.12	PMC1	Vacuolar calcium P-type ATPase; transcription is regulated by calcineurin and fluconazole; mutant shows increased resistance to fluconazole or lithium, and increased sensitivity to calcium
orf19.1728	0.95	0.663	1.026	0.679	0	0
orf19.1729	1.144	0.218	1.015	0.797	0	Putative transcription factor with zinc finger DNA-binding motif
orf19.173	0.805	0.0403	0.841	0.00963	0	Putative transcription factor with zinc finger DNA-binding motif; transcriptionally activated by Mnl1p under weak acid stress
orf19.1730	1.018	0.64	0.853	0.188	0	S. cerevisiae ortholog Nhp10p has loop DNA binding, DNA end binding, has role in nucleosome mobilization, double-strand break repair and localizes to Ino80 complex
orf19.1731	0.703	no replicates	0.986	no replicates	#N/A	#N/A
orf19.1732	0.644	no replicates	1.144	no replicates	#N/A	#N/A
orf19.1733	0.611	no replicates	1.034	no replicates	#N/A	#N/A
orf19.1734	0.973	0.759	1.038	0.47	0	Putative ATPase and nucleosome spacing factor; heterozygous null mutant displays sensitivity to virgineone
orf19.1735	0.895	0.258	1.27	0.0539	0	0
orf19.1736	0.746	0.173	0.94	0.501	0	Predicted ORF in Assemblies 19, 20 and 21; transcription detected in high-resolution tiling array experiments
orf19.1737	0.887	0.595	0.929	0.418	0	0
orf19.1738	1.09	0.355	0.999	0.98	UGP1	Protein similar to UTP-glucose-1-phosphaturidyl transferase; localizes to cell surface of yeast-form cells, but not hyphal cells; Hog1p-downregulated; stationary phase enriched protein
orf19.1738.1	1.022	0.809	1.092	0.41	0	S. cerevisiae ortholog Rbl2p has beta-tubulin binding, has role in microtubule cytoskeleton organization and localizes to cytoplasm
orf19.174	0.814	no replicates	0.786	no replicates	#N/A	#N/A
orf19.1741	0.562	0.624	1.421	no replicates	DIT1	S. cerevisiae ortholog Dit1p has catalytic activity and has role in ascospore wall assembly
orf19.1742	1.067	0.629	1.058	0.432	HEM3	Hydroxymethylbilane synthase (uroporphyrinogen I synthase); converts 4-porphobilinogen to hydroxymethylbilane, third step in the heme biosynthesis; transcription greater in high iron, CO2; alkaline downregulated; Hap43p-repressed
orf19.1743	0.855	0.0976	0.909	0.171	ACS1	Putative acetyl-CoA synthetase; upregulated by human neutrophils; fluconazole-downregulated; regulated by Nrg1p and Mig1p; shows colony morphology-related gene regulation by Ssn6p; only detected in stationary phase cultures; biofilm-induced
orf19.1744	1.032	0.664	1.172	0.0668	HEM4	Putative uroporphyrinogen III synthase; transcriptionally regulated by iron; expression greater in high iron or elevated CO2; alkaline downregulated; Hap43p-repressed
orf19.1745	1.045	0.733	1.196	0.121	0	Hap43p-repressed gene
orf19.1746	2.78	0.136	0.898	0.697	0	Protein similar to S. cerevisiae meiosis-specific, spore-wall-localized protein Ssp2p, which is required for wild-type outer spore wall formation in S. cerevisiae; possibly an essential gene (UAU1 method); Hap43p-repressed
orf19.1747	1.052	0.329	1.324	0.0313	KIP2	Protein similar to S. cerevisiae Kip2p; transcription is repressed in response to alpha pheromone in SpiderM medium; periodic mRNA expression, peak at cell-cycle G2/M phase
orf19.1748	1.057	0.428	1.013	0.88	0	Predicted ORF in Assemblies 19, 20 and 21; shows colony morphology-related gene regulation by Ssn6p
orf19.175	0.93	0.35	1.078	0.231	0	0
orf19.1750	0.941	0.566	0.933	0.371	CNL1	Protein similar to mammalian SR-like RNA splicing factor; gene has intron; significant changes made to ORF with coordinate updates (see Locus History)
orf19.1751	0.852	0.189	0.888	0.226	SPT23	Protein involved in regulation of unsaturated fatty acid biosynthesis; controls the expression of the Ole1p delta-9-fatty acid desaturase
orf19.1753	0.814	0.0463	1.223	0.00466	PUS7	Protein similar to S. cerevisiae tRNA modification protein; induced upon biofilm formation
orf19.1754	1.179	0.0805	0.977	0.653	0	Putative calmodulin-dependent protein kinase; possibly an essential gene, disruptants not obtained by UAU1 method
orf19.1755	0.941	0.636	1.114	0.113	SET2	Ortholog of S. cerevisiae Set2p
orf19.1756	0.882	0.327	0.866	0.00163	GPD1	Protein similar to S. cerevisiae glycerol-3-phosphate dehydrogenase (enzyme of glycerol biosynthesis); biofilm-induced expression; regulated by Efg1p; regulated by Tsa1p, Tsa1Bp under H2O2 stress conditions
orf19.1757	1.04	0.611	0.941	0.319	0	Putative transcription factor with zinc finger DNA-binding motif; transcription is upregulated in clinical isolates from HIV+ patients with oral candidiasis
orf19.1759	0.925	0.462	0.904	0.265	PHO23	Ortholog of S. cerevisiae Pho23p
orf19.176	1.193	no replicates	1.25	no replicates	OPT4	Oligopeptide transporter; detected at germ tube plasma membrane; transcriptionally induced upon phagocytosis by macrophage; fungal-specific (no human or murine homolog); Hap43p-repressed; merged with orf19.2292 in Assembly 20
orf19.1760	1.172	0.129	1.151	0.00765	RAS1	RAS signal transduction GTPase; regulates cAMP and MAP kinase pathways; role in hyphal induction, virulence, apoptosis, heat-shock sensitivity; nonessential; plasma membrane-localized; complements viability of S. cerevisiae ras1 ras2 mutant
orf19.1761	0.961	0.616	0.914	0.0684	0	S. cerevisiae ortholog Ost2p has dolichyl-diphosphooligosaccharide-protein glycotransferase activity, has role in protein N-linked glycosylation and localizes to oligosaccharyltransferase complex
orf19.1762	0.857	0.0758	0.91	0.167	OCA1	Putative protein phosphatase of the PTP family (tyrosine-specific), similar to S. cerevisiae Oca1p; mutant shows virulence defect; not essential for viability
orf19.1763	6.616	0.0278	3.001	0.000108	IFR1	Predicted ORF in Assemblies 19, 20 and 21; induced by nitric oxide
orf19.1764	1.127	0.108	1.084	0.181	0	0
orf19.1765	0.952	0.659	0.915	0.398	0	Secreted protein; fluconazole-induced
orf19.1766	0.237	0.244	1.005	0.967	0	Secreted protein; fluconazole-induced
orf19.1767	0.946	0.44	1.162	0.0692	0	S. cerevisiae ortholog Ubp8p has protein complex scaffold, ubiquitin-specific protease activity, has role in histone deubiquitination and localizes to SAGA complex, DUBm complex, SLIK (SAGA-like) complex
orf19.1768	1.012	0.921	1.229	0.0319	0	0
orf19.1769	1.03	0.651	1.031	0.74	0	S. cerevisiae ortholog Plp2p has actin binding, G-protein beta/gamma-subunit complex binding, has role in protein folding, positive regulation of transcription from RNA polymerase II promoter by pheromones and localizes to cytoplasm
orf19.177	0.789	0.00856	0.851	0.0526	0	0
orf19.1770	1.088	0.334	1.361	0.00336	CYC1	Cytochrome c; complements defects of S. cerevisiae cyc1 cyc7 double mutant; regulated by iron; expression greater in high iron; alkaline downregulated; repressed by nitric oxide; Cap2-dependent downregulation in low iron; Hap43p-repressed
orf19.1771	0.729	0.137	1.228	0.0573	0	0
orf19.1772	0.844	0.28	1.285	0.00987	0	0
orf19.1773	0.807	0.0332	1.003	0.953	RAP1	Transcriptional regulator that binds telomeres and regulatory sequences in DNA; involved in telomere maintenance; represses hyphal growth under yeast-favoring conditions; similar to (but shorter than) S. cerevisiae Rap1p
orf19.1774	1.572	no replicates	0.519	no replicates	0	Predicted ORF in Assemblies 19, 20 and 21; transcription is upregulated in an RHE model of oral candidiasis; virulence-group-correlated expression
orf19.1775	1.7	no replicates	1.3	no replicates	#N/A	#N/A
orf19.1776	0.982	0.87	0.962	0.626	0	S. cerevisiae ortholog Cab4p has role in coenzyme A biosynthetic process and localizes to nucleus, cytoplasm
orf19.1777	1.12	0.236	0.978	0.696	0	S. cerevisiae ortholog Ubp15p has ubiquitin-specific protease activity and localizes to cytoplasm
orf19.1778	1.348	0.15	1.212	0.351	0	0
orf19.1779	1.078	0.396	1.117	0.191	MP65	Cell surface mannoprotein; cell-wall glucan metabolism, biofilm, adhesion; adhesin motif; O-glycosylation; induced by heat, germ tube formation, wall regeneration; mycelial antigen; diagnostic marker; fluconazole-repressed
orf19.178	0.938	0.515	0.917	0.268	0	0
orf19.1780	NO DATA	NO DATA	1.58	0.623	0	0
orf19.1781	2.033	no replicates	NO DATA	NO DATA	#N/A	#N/A
orf19.1782	NO DATA	NO DATA	NO DATA	NO DATA	0	Membrane-localized protein
orf19.1782.1	NO DATA	NO DATA	NO DATA	NO DATA	0	ORF added to Assembly 21 based on comparative genome analysis; has intron
orf19.1783	0.877	0.16	1.281	0.0314	YOR1	Protein similar to S. cerevisiae Yor1p, which is a plasma membrane transporter of the ATP-binding cassette (ABC) family involved in resistance to aureobasidin A; transcription is specific to white cell type
orf19.1784	0.909	no replicates	1.391	no replicates	#N/A	#N/A
orf19.1785	0.975	0.77	0.844	0.0315	0	Hap43p-repressed gene; biofilm-induced
orf19.1786	0.952	no replicates	0.966	no replicates	#N/A	#N/A
orf19.1787	1.078	no replicates	1.057	no replicates	#N/A	#N/A
orf19.1788	1.182	no replicates	0.921	no replicates	#N/A	#N/A
orf19.1789	0.866	0.189	1.062	0.427	0	Ortholog of C. glabrata Cagl0j11110gp
orf19.1789.1	0.959	0.693	0.842	0.000743	LYS1	Saccharopine dehydrogenase (biosynthetic); enzyme of alpha-aminoadipate lysine biosynthesis pathway; functionally complements S. cerevisiae lys1 mutation; fungal-specific (no human or murine homolog)
orf19.179	1.469	no replicates	1.091	no replicates	#N/A	#N/A
orf19.1790	0.79	no replicates	0.817	no replicates	#N/A	#N/A
orf19.1791	0.722	0.0104	1.2	0.00574	0	Putative protein with a predicted role in 60S ribosomal subunit biogenesis; Hap43p-induced gene; ortholog of S. cerevisiae MAK11
orf19.1792	0.888	0.142	0.979	0.718	0	Ortholog of S. cerevisiae Cdc16p
orf19.1793	0.924	0.455	1.224	0.025	0	S. cerevisiae ortholog Hsv2p has phosphatidylinositol binding, has role in piecemeal microautophagy of nucleus and localizes to endosome, peripheral to membrane of membrane fraction, fungal-type vacuole
orf19.1794	1.006	0.922	1.064	0.432	0	0
orf19.1795	0.881	0.0419	0.895	0.0706	PUF3	Protein not essential for viability; similar to S. cerevisiae Puf3p, which is an mRNA-binding protein involved in RNA catabolism
orf19.1795.1	NO DATA	NO DATA	NO DATA	NO DATA	0	0
orf19.1796	0.997	0.963	1.044	0.563	0	S. cerevisiae ortholog Ypl113cp has oxidoreductase activity, acting on the CH-OH group of donors, NAD or NADP as acceptor and has role in metabolic process
orf19.1797	1.153	0.115	1.246	0.00736	0	Predicted ORF in Assemblies 19, 20 and 21; induced upon biofilm formation; has GutQ domain, which is associated with phosphosugar binding
orf19.1798	0.886	0.0615	1.03	0.711	TSC2	Putative GTPase-activating protein involved in control of filamentous growth; not essential for viability; similar to mammalian tuberin
orf19.1799	0.69	0.0479	0.97	0.664	GAP5	Putative general amino acid permease; fungal-specific (no human or murine homolog)
orf19.18	0.789	0.00836	1.061	0.538	IMH3	Inosine monophosphate (IMP) dehydrogenase; enzyme of GMP biosynthesis; target of mycophenolic acid and mizoribine monophosphate; antigenic during infection; downregulated in core stress response; snoRNA snR54 encoded within IMH3 intron
orf19.180	0.517	no replicates	NO DATA	NO DATA	#N/A	#N/A
orf19.1800	1.097	0.69	0.727	0.1	0	Ortholog of S. cerevisiae Tda6p
orf19.1801	1.029	0.812	0.862	0.0841	CBR1	Putative cytochrome B5 reductase; plasma membrane-localized
orf19.1802	0.849	0.313	1.241	0.0416	0	Putative termination and polyadenylation protein; decreased expression in response to prostaglandins
orf19.1803	0.893	0.356	0.973	0.671	CDC43	Beta subunit of heterodimeric protein geranylgeranyltransferase type I; GGTase I enzyme binds zinc, is Mg-dependent; Cdc42p is GGTase I substrate
orf19.1804	0.966	0.638	0.995	0.925	0	S. cerevisiae ortholog Ydl119cp localizes to mitochondrion
orf19.1805	0.931	0.47	0.809	0.00632	PEX14	S. cerevisiae ortholog Pex14p has protein binding, bridging, has role in protein import into peroxisome matrix, docking and localizes to peroxisomal membrane
orf19.1806	0.786	0.164	0.936	0.251	0	0
orf19.1808	0.965	0.508	0.966	0.462	0	Putative protein of unknown function, transcription is positively regulated by Tbf1p
orf19.1809	0.709	no replicates	0.436	no replicates	#N/A	#N/A
orf19.181	0.624	no replicates	3.2	no replicates	#N/A	#N/A
orf19.1812	0.787	no replicates	1.031	no replicates	#N/A	#N/A
orf19.1813	0.92	0.665	0.996	0.982	FLC2	Protein involved in heme uptake; putative FAD transporter, similar to S. cerevisiae Flc2p
orf19.1814	0.984	0.812	0.898	0.0374	0	Putative phosphatidylinositol-4-kinase; possibly an essential gene, disruptants not obtained by UAU1 method
orf19.1815	0.818	0.0914	0.991	0.897	0	Ortholog of S. cerevisiae Tif6p
orf19.1816	0.977	0.826	0.865	0.159	ALS3	ALS family cell wall adhesin; role in epithelial adhesion, endothelial invasiveness; allelic variation in adhesiveness; immunoprotective in mice; promotes biofilm formation by binding to SspB adhesin of S. gordonii; fluconazole-repressed
orf19.1817	1.28	no replicates	NO DATA	NO DATA	#N/A	#N/A
orf19.1818	0.182	no replicates	1.232	no replicates	#N/A	#N/A
orf19.182	0.809	0.0385	1.154	0.00536	0	S. cerevisiae ortholog Mrm1p has rRNA (guanine-N1-)-methyltransferase activity, has role in rRNA modification and localizes to mitochondrion
orf19.1820	NO DATA	NO DATA	NO DATA	NO DATA	#N/A	#N/A
orf19.1821	0.819	0.626	0.826	0.43	0	Predicted ORF in Assemblies 19, 20 and 21; transcription is repressed in response to alpha pheromone in SpiderM medium
orf19.1822	0.117	0.223	0.562	0.541	UME6	Zinc cluster DNA-binding transcription factor required for wild-type hyphal extension, virulence, adherence to plastic; filament induced; regulated by Nrg1p, Tup1p, Rfg1p, alkaline conditions; expression promotes highly filamentous biofilms
orf19.1823	1.195	0.127	0.965	0.47	0	Predicted ORF in Assemblies 19, 20 and 21; transcription is downregulated in response to treatment with ciclopirox olamine
orf19.1824	1.041	0.96	0.672	0.184	PGA50	Putative GPI-anchored protein; adhesin-like protein
orf19.1825	1.054	0.687	1.008	0.897	0	Protein not essential for viability; filament induced; regulated by Nrg1p, Rfg1p, Tup1p
orf19.1826	0.876	0.213	1.075	0.418	MDM34	Putative transcription factor with zinc finger DNA-binding motif; macrophage-downregulated gene; biofilm-induced
orf19.1827	0.886	0.705	1.173	0.711	0	Biofilm-induced gene; transcription is induced in response to alpha pheromone in SpiderM medium
orf19.1828	1.191	0.173	1.157	0.189	BUD16	Protein similar to S. cerevisiae Bud16p; induced in response to alpha pheromone in SpiderM medium
orf19.1829	1.403	no replicates	1.195	no replicates	#N/A	#N/A
orf19.183	1.119	0.264	1.115	0.177	HIS3	Imidazoleglycerol-phosphate dehydratase, enzyme of histidine biosynthesis; functionally complements S. cerevisiae his3-1 mutation; hyphal-induced expression; regulated by Gcn2p and Gcn4p; fungal-specific (no human or murine homolog)
orf19.1830	0.897	0.301	0.967	0.67	0	Hap43p-induced gene
orf19.1831	1.052	0.704	0.878	0.517	0	0
orf19.1832	0.916	0.253	0.888	0.225	FCY23	Putative transporter; Gcn4p-regulated; more similar to S. cerevisiae Tpn1p, which is a vitamin B6 transporter, than to purine-cytosine permeases
orf19.1833	0.739	0.0621	1.187	0.0161	0	S. cerevisiae ortholog Cbf5p has pseudouridine synthase activity, has role in snRNA pseudouridine synthesis, box H/ACA snoRNA 3'-end processing, rRNA pseudouridine synthesis and localizes to 90S preribosome, box H/ACA snoRNP complex
orf19.1834	1.087	0.431	0.894	0.0764	0	0
orf19.1835	1.03	0.752	0.945	0.5	0	0
orf19.1836	0.942	0.18	1.02	0.608	APN2	Putative class II abasic (AP) endonuclease; flucytosine induced
orf19.1837	0.841	0.191	1.075	0.429	TBP1	Transcription initiation factor; binds TATA box sequence, and binding does not require TFIIA; caspofungin repressed; functional homolog of S. cerevisiae and human TATA-binding proteins
orf19.1839	0.72	0.0287	1.156	0.0991	RPA190	Putative RNA polymerase I subunit A190; Hap43p-induced gene; flucytosine induced
orf19.184	1.05	0.637	1.038	0.538	0	S. cerevisiae ortholog Mdm10p has role in protein import into mitochondrial outer membrane, phospholipid transport, mitochondrial outer membrane translocase complex assembly
orf19.1840	1.195	0.234	0.959	0.458	0	S. cerevisiae ortholog Tcb1p has lipid binding and localizes to plasma membrane enriched fraction, mitochondrion
orf19.1841	0.876	0.313	1.091	0.283	0	Hap43p-induced gene
orf19.1842	1.003	0.977	0.991	0.899	0	S. cerevisiae ortholog Bud5p localizes to incipient cellular bud site, cellular bud neck
orf19.1843	0.955	0.514	0.876	0.0223	ALG6	Putative glucosyltransferase involved in cell wall mannan biosynthesis; transcription is elevated in chk1, nik1, and sln1 homozygous null mutants; repressed by nitric oxide; possibly essential gene, disruptants not obtained by UAU1 method
orf19.1844	1.306	0.37	1.271	0.475	0	Protein similar to ferric reductase Fre10p
orf19.1845	NO DATA	NO DATA	1.5	no replicates	#N/A	#N/A
orf19.1847	1.593	0.48	0.854	0.0995	ARO10	Aromatic decarboxylase of the Ehrlich fusel oil pathway of aromatic alcohol biosynthesis; pH-regulated (alkaline downregulated); protein abundance is affected by URA3 expression in the CAI-4 strain background
orf19.1848.1	0.931	0.561	1.259	0.0489	0	Ortholog of S. cerevisiae Ksh1p
orf19.1849	0.811	0.0237	1.22	0.0133	0	S. cerevisiae ortholog Utp25p has U3 snoRNA binding, rRNA binding, has role in maturation of SSU-rRNA from tricistronic rRNA transcript (SSU-rRNA, 5.8S rRNA, LSU-rRNA) and localizes to nucleolus, small-subunit processome
orf19.185	0.917	0.159	0.993	0.906	0	S. cerevisiae ortholog Mrp51p has structural constituent of ribosome, has role in mitochondrial translational initiation and localizes to mitochondrial small ribosomal subunit
orf19.1850	1.003	0.962	1.027	0.607	SIW14	Putative protein phosphatase of the PTP family (tyrosine-specific), similar to S. cerevisiae Siw14p; mutant shows virulence defect; Hap43p-repressed gene
orf19.1852	1.089	0.464	0.809	0.00831	0	0
orf19.1853	NO DATA	NO DATA	NO DATA	NO DATA	HHT2	Putative histone H3; farnesol regulated; Hap43p-induced gene
orf19.1854	NO DATA	NO DATA	NO DATA	NO DATA	HHF22	Putative histone H4; regulated by Efg1p; flucytosine, fluconazole-induced; amphotericin B, caspofungin repressed; shows colony morphology-related gene regulation by Ssn6p; Hap43p-induced
orf19.1855	1.159	0.309	0.861	0.513	0	Predicted membrane transporter, member of the anion:cation symporter (ACS) family, major facilitator superfamily (MFS); Gcn4p-regulated; flucytosine induced; ketoconazole-repressed; oxidative stress-induced via Cap1p
orf19.1856	0.812	0.034	1.047	0.502	0	Ortholog of C. glabrata Cagl0m06699gp
orf19.1857	0.663	0.152	0.642	0.00132	0	Protein not essential for viability
orf19.1859	1.9	no replicates	NO DATA	NO DATA	#N/A	#N/A
orf19.1860	0.644	0.0152	0.897	0.279	LSC2	Putative succinate-CoA ligase beta subunit; transcription regulated by Mig1p and Tup1p; transcriptionally regulated by iron; expression greater in high iron; filament; protein present in exponential and stationary growth phase yeast cells
orf19.1860.1	1.149	0.36	0.816	0.00997	0	0
orf19.1861	1.054	0.564	0.946	0.322	0	Late-stage biofilm-induced
orf19.1862	1.512	0.177	1.069	0.477	0	Possible stress protein; increased transcription associated with CDR1 and CDR2 overexpression or fluphenazine treatment; transcription regulated by Sfu1p, Nrg1p, Tup1p; stationary phase enriched protein
orf19.1863	0.431	no replicates	0.467	0.269	0	0
orf19.1864	0.985	0.886	0.949	0.541	0	S. cerevisiae ortholog Ydr333cp localizes to cytoplasm
orf19.1865	1.127	0.44	0.897	0.127	0	S. cerevisiae ortholog Msc7p has role in reciprocal meiotic recombination and localizes to endoplasmic reticulum
orf19.1866	1.03	0.676	0.993	0.882	VMA10	S. cerevisiae ortholog Vma10p localizes to vacuolar proton-transporting V-type ATPase, V1 domain
orf19.1867	1.475	0.052	1.258	0.0585	0	Putative malate permease; induced during macrophage infection; regulated by Gcn2p and Gcn4p; has putative peroxisome targeting signal; Hap43p-repressed gene
orf19.1868	3.83	0.0409	1.825	0.0342	RNR22	Putative ribonucleoside diphosphate reductase; shows colony morphology-related gene regulation by Ssn6p; RNA abundance regulated by tyrosol and cell density; Hap43p-repressed gene; biofilm- and planktonic growth-induced
orf19.1869	NO DATA	NO DATA	NO DATA	NO DATA	#N/A	#N/A
orf19.187	0.782	no replicates	0.974	no replicates	#N/A	#N/A
orf19.1871	1.032	0.808	0.919	0.315	0	S. cerevisiae ortholog Swr1p has structural molecule activity, has role in histone exchange and localizes to Swr1 complex
orf19.1872	0.944	0.522	0.895	0.168	0	Plasma membrane protein; repressed by nitric oxide
orf19.1873	1.199	0.42	0.923	0.122	0	Hap43p-repressed gene; repressed by nitric oxide
orf19.1874	1.272	0.474	1.186	0.423	0	S. cerevisiae ortholog Mek1p has protein serine/threonine kinase activity, has role in protein phosphorylation, meiotic recombination checkpoint and localizes to nucleus
orf19.1875	NO DATA	NO DATA	NO DATA	NO DATA	#N/A	#N/A
orf19.1876	0.871	0.177	1.005	0.933	0	0
orf19.1877	0.953	0.534	1.031	0.479	0	S. cerevisiae ortholog Ylr271wp localizes to nucleus, cytoplasm
orf19.1878	1.032	0.834	1.024	0.71	0	S. cerevisiae ortholog Med4p has role in transcription from RNA polymerase II promoter and localizes to core mediator complex
orf19.188	1.008	0.955	1.057	0.593	0	0
orf19.1880	1.081	0.242	0.765	7.19e-05	HEM15	Putative ferrochelatase involved in heme biosynthesis; transcription is not regulated by iron levels and is also not affected by a yfh1 null mutation
orf19.1881	1.088	0.452	0.911	0.128	0	S. cerevisiae ortholog Ale1p has 1-acylglycerophosphocholine O-acyltransferase activity, 1-acylglycerol-3-phosphate O-acyltransferase activity and has role in glycerophospholipid biosynthetic process
orf19.1883	1.006	0.948	1.007	0.93	YCS4	Putative condensin complex subunit; cell-cycle regulated periodic mRNA expression
orf19.1885	1.042	0.671	1.07	0.441	TAF4	Putative TFIID subunit; mutation confers hypersensitivity to toxic ergosterol analog
orf19.1886	0.743	0.00344	1.201	0.00395	RCL1	Putative U3-containing 90S preribosome processome complex subunit; Hap43p-induced gene; essential; downregulated during core stress response; S. cerevisiae ortholog is essential
orf19.1887	1.572	0.15	1.409	0.00246	0	S. cerevisiae ortholog Yeh1p has sterol esterase activity, has role in sterol metabolic process and localizes to lipid particle, integral to membrane
orf19.1888	1.127	0.178	0.915	0.248	0	Ortholog of S. cerevisiae Urh1p
orf19.1889	0.953	0.647	1.133	0.11	0	Putative phosphoglycerate mutase family protein; stationary phase enriched protein; early-stage biofilm-induced
orf19.1890	0.627	0.0052	0.788	0.0628	0	S. cerevisiae ortholog Ymr210wp has role in medium-chain fatty acid biosynthetic process
orf19.1891	1.847	0.105	0.931	0.286	APR1	Vacuolar aspartic proteinase; mRNA abundance equivalent in yeast-form and mycelial cells but is elevated at lower growth temperatures; upregulated in the presence of human neutrophils; protein enriched in stationary phase cultures
orf19.1892	1.8	no replicates	NO DATA	NO DATA	#N/A	#N/A
orf19.1893	0.968	0.709	0.891	0.0168	0	0
orf19.1896	1.036	0.417	0.812	0.000845	SSC1	Heat shock protein; at yeast-form cell surface, not hyphae; antigenic; Gcn4p-regulated; induced by amino acid starvation (3-aminotriazole) or upon adherence to polystyrene; macrophage-downregulated; sumoylation target; possibly essential
orf19.1897	0.762	0.0922	1.054	0.493	0	0
orf19.1899	NO DATA	NO DATA	NO DATA	NO DATA	#N/A	#N/A
orf19.19	0.791	no replicates	1.185	no replicates	#N/A	#N/A
orf19.190	0.931	0.286	0.891	0.106	0	0
orf19.1900	0.821	0.0512	1.075	0.413	0	0
orf19.1901	0.957	0.627	0.98	0.783	MCM3	Putative DNA replication protein; periodic mRNA expression, peak at cell-cycle M/G1 phase
orf19.1902	0.868	0.515	1.07	0.446	NOC4	Putative nucleolar protein; Hap43p-induced gene; mutation confers resistance to 5-fluorocytosine (5-FC), 5-fluorouracil (5-FU), and tubercidin (7-deazaadenosine)
orf19.1903	1.193	no replicates	0.97	no replicates	#N/A	#N/A
orf19.1904	NO DATA	NO DATA	NO DATA	NO DATA	#N/A	#N/A
orf19.1905	0.81	no replicates	0.716	no replicates	#N/A	#N/A
orf19.1906	1.145	0.12	1.074	0.177	0	Late-stage biofilm-induced gene
orf19.1907	1.047	0.593	0.993	0.908	EMC9	Protein not essential for viability, induced during the mating process
orf19.191	1.021	0.768	0.964	0.534	KIC1	Member of the GCK-III subfamily of eukaryotic Ste20p kinases; in RAM cell wall integrity signaling network; role in cell separation, azole sensitivity; required for hyphal growth; constitutive expression is MTL, white-opaque independent
orf19.1910	0.982	0.786	1.06	0.409	0	Hap43p-repressed gene
orf19.1911	1.058	0.773	1.018	0.8	PGA52	GPI-anchored cell surface protein of unknown function; Hap43p-repressed gene; fluconazole-induced; possibly an essential gene, disruptants not obtained by UAU1 method
orf19.1913	0.894	0.272	0.995	0.909	0	Late-stage biofilm-induced gene
orf19.1914	1.136	0.2	1.127	0.449	FAV3	Putative alpha-1,6-mannanase; induced by mating factor in MTLa/MTLa opaque cells
orf19.1915	0.806	0.0473	1.165	0.0416	MPP10	Putative SSU processome and 90S preribosome component; downregulated in core stress response; decreased expression in response to prostaglandins
orf19.1917	1.05	0.682	0.781	0.0249	0	0
orf19.192	0.825	0.226	0.869	0.032	0	0
orf19.1920	1.267	0.21	1.158	0.52	0	0
orf19.1923	0.849	0.138	1.089	0.255	RRN3	Protein with a predicted role in recruitment of RNA polymerase I to rDNA; caspofungin induced, flucytosine repressed; downregulated in core stress response; decreased expression in response to prostaglandins
orf19.1925	1.55	no replicates	1.174	no replicates	TLO5	Member of a family of telomere-proximal genes of unknown function; may be spliced in vivo
orf19.1926	0.99	0.951	1.017	0.918	SEF2	Putative zinc cluster protein, required for normal resistance to copper; expression is repressed by Sfu1p under high-iron conditions
orf19.1927	0.833	0.0582	1.154	0.0954	SNM1	Protein similar to RNase MRP RNA binding protein; ciclopirox olamine induced
orf19.1928	NO DATA	NO DATA	1.2	no replicates	#N/A	#N/A
orf19.193	0.91	0.514	0.852	0.175	0	0
orf19.1930	0.537	0.148	0.628	0.00727	CFL5	Protein similar to ferric reductase Fre10p; expression greater in low iron; negatively regulated by Sfu1p; ciclopirox olamine, flucytosine induced; amphotericin B repressed; transcription is positively regulated by Tbf1p, Hap43p
orf19.1932	0.228	0.0277	0.445	0.000308	CFL4	Similar to ferric reductase, C-terminal region; expression greater in low iron; transcription is negatively regulated by Sfu1p; ciclopirox olamine induced; shows colony morphology-related gene regulation by Ssn6p; Hap43p-repressed
orf19.1933	1.054	0.731	0.777	0.0067	0	S. cerevisiae ortholog Pex29p has role in peroxisome organization and localizes to peroxisomal membrane
orf19.1934	0.845	0.0329	0.952	0.184	HST3	Histone H3K56 deacetylase; reduced copy number increases opaque cell formation; repressed by MMS, hydroxyurea and high-levels of hydrogen peroxide; Hap43p-induced; ectopic expression blocks genotoxin-induced switching; nicotinamide target
orf19.1935	0.901	0.346	1.073	0.423	0	0
orf19.1936	1.118	0.345	0.844	0.033	SNF1	Essential protein; functional homolog of S. cerevisiae Snf1p regulator of sugar metabolism; constitutively expressed; Thr208 phosphorylation may have regulatory role; up-regulation associated with azole resistance; has polyhistidine tract
orf19.1938	0.987	0.967	0.932	0.423	0	Decreased transcription is observed in an azole-resistant strain that overexpresses CDR1 and CDR2; increased transcription is observed upon benomyl treatment
orf19.1939	1.117	0.923	1.2	no replicates	0	0
orf19.194	0.874	0.207	1.091	0.361	0	0
orf19.1940	1.019	0.875	1.023	0.75	0	S. cerevisiae ortholog Cat5p has role in ubiquinone biosynthetic process and localizes to mitochondrial inner membrane
orf19.1941	1.198	0.295	1.128	0.084	NUF2	Kinetochore component; amount of Nuf2p and Mtw1p protein detected at each centromere is consistent with a single kinetochore microtubule attachment site
orf19.1942	0.899	0.402	0.844	0.0585	SGE1	Putative multidrug resistance factor; transcriptionally regulated by iron; expression greater in low iron; Hap43p-induced gene
orf19.1943	2.103	0.2	1.349	0.209	0	0
orf19.1944	1.033	0.695	1.039	0.627	GPR1	Plasma membrane G-protein-coupled receptor of the cAMP-PKA pathway; required for wild-type hyphal growth; reports differ on role in cAMP-mediated glucose signaling; Gpr1p C terminus binds Gpa2p; regulates HWP1 and ECE1; biofilm-induced
orf19.1945	0.837	0.324	0.975	0.639	AUR1	Inositolphosphorylceramide (IPC) synthase, catalyzes the key step in the synthesis of sphingolipids; target for antifungal drugs; mutation confers hypersensitivity to aureobasidin A; late-stage biofilm-induced
orf19.1946	1.008	0.902	1.01	0.898	0	Similar to an aldose 1-epimerase-related protein; antigenic during murine systemic infection; protein present in exponential and stationary growth phase yeast cultures; Hap43p-induced gene
orf19.1948	1.112	0.22	1.255	0.015	0	0
orf19.1949	1.049	0.511	0.827	0.0118	VPS1	Dynamin-family GTPase-related protein; induced upon adherence to polystyrene; regulated by Gcn2p and Gcn4p
orf19.195	1.993	no replicates	0.957	no replicates	#N/A	#N/A
orf19.1950	0.873	0.23	1.067	0.484	0	S. cerevisiae ortholog Poa1p has phosphatase activity
orf19.1952	0.972	no replicates	1.025	no replicates	#N/A	#N/A
orf19.1953	0.951	0.626	1.017	0.692	0	Predicted ORF in Assemblies 19, 20 and 21; not essential for viability; merged with orf19.1952 in Assembly 21
orf19.1954	0.961	0.819	1.056	0.345	PUS4	Putative pseudouridine synthase; transcription is regulated by Nrg1p, Mig1p, and Tup1p
orf19.1955	0.877	0.302	0.933	0.307	0	S. cerevisiae ortholog Shr5p has protein-cysteine S-palmitoleyltransferase activity and has role in protein palmitoylation, protein targeting to membrane
orf19.1956	0.957	0.56	0.974	0.649	0	0
orf19.1957	1	0.998	1.139	0.134	CYC3	Cytochrome c heme lyase, mitochondrial; gene also encodes antigenic cell-wall protein; mRNA more abundant in filaments than yeast-form; induced on polystyrene adherence, interaction with macrophage; N-glycosylation, 2 heme-binding motifs
orf19.1958	6.249	no replicates	NO DATA	NO DATA	0	0
orf19.1959	0.911	0.25	0.947	0.277	0	S. cerevisiae ortholog Otu2p localizes to ribosome, cytoplasm
orf19.196	0.598	no replicates	0.741	no replicates	#N/A	#N/A
orf19.1960	0.763	0.0301	0.923	0.0318	CLN3	G1 cyclin; depletion abolishes budding and causes hyphal growth defects; farnesol regulated, upregulated in biofilm; functional in S. cerevisiae; possibly essential gene, disruptants not obtained by UAU1 method
orf19.1961	0.914	0.385	1.043	0.298	0	Planktonic growth-induced gene
orf19.1963	1.038	0.85	0.815	0.0194	GDS1	Putative mitochondrial protein; Hap43p-repressed gene
orf19.1964	0.748	0.12	0.923	0.157	0	Putative protein of unknown function; downregulated upon fluphenazine treatment; upregulated upon benomyl treatment and in an RHE model; regulated by Nrg1p, Tup1p
orf19.1966	0.734	0.0287	1.175	0.0598	BUD23	Putative methyltransferase; Hap43p-induced gene; decreased expression in response to prostaglandins
orf19.1967	0.898	0.307	1.191	0.0743	0	S. cerevisiae ortholog Img1p has structural constituent of ribosome and localizes to mitochondrial large ribosomal subunit
orf19.1968	1.228	0.0764	1.351	0.00189	0	0
orf19.1968.1	0.789	0.0472	0.984	0.826	0	0
orf19.1969	0.553	0.12	1.191	0.102	CCW14	Putative mannoprotein of cell wall with role in response to stress; increased mRNA abundance observed in cyr1 homozygous mutant (hyphal or yeast-form cells) and in ras1 homozygous mutant (yeast-form cells)
orf19.1970	0.979	0.682	1.11	0.124	0	Putative vacuole biogenesis protein
orf19.1971	0.822	0.245	1.214	0.0285	0	0
orf19.1972	0.959	0.612	1.118	0.179	0	S. cerevisiae ortholog Set5p localizes to nucleus, cytoplasm
orf19.1973	0.978	0.808	0.974	0.731	HAP5	Component of CCAAT-binding transcription factor; roles in filamentous growth, low-iron induction of FRP1; regulates genes involved in respiratory growth; functional homolog of S. cerevisiae Hap5p; Cap1p-dependent expression in low iron
orf19.1974	1.461	0.0956	0.885	0.0453	TFS1	Putative carboxypeptidase y inhibitor; transcription is regulated upon yeast-hyphal switch; shows colony morphology-related gene regulation by Ssn6p
orf19.1975	0.971	0.644	1.239	0.00275	0	S. cerevisiae ortholog Dib1p has role in nuclear mRNA splicing, via spliceosome and localizes to U5 snRNP, U4/U6 x U5 tri-snRNP complex
orf19.1976	0.835	0.265	1.295	0.0234	TRX2	Similar to thioredoxins; not expected to be enzymatically active because it lacks a canonical thioredoxin active site (Trp-Cys-Gly-Pro-Cys); TRX1 encodes all of the cytoplasmic/nuclear thioredoxin function in C. albicans; Hap43p-induced
orf19.1977	0.961	0.68	1.054	0.405	URA4	Dihydroorotase; protein present in exponential and stationary growth phase yeast cultures
orf19.1978	1.085	0.388	0.841	0.126	GIT2	Putative glycerophosphoinositol permease; fungal-specific (no human or murine homolog); transcription is repressed in response to alpha pheromone in SpiderM medium; Hap43p-repressed gene
orf19.1979	1.906	0.00109	1.282	0.0106	GIT3	Putative glycerophosphoinositol permease; fungal-specific (no human/murine homolog); alkaline downregulated; transcription specific to white cell type; caspofungin, macrophage/pseudohyphal-repressed; biofilm-induced
orf19.198	0.865	0.131	0.873	0.0147	ASN1	Putative asparagine synthetase; soluble protein in hyphae; regulated by Rim101p; decreased expression at pH 4 vs pH 8; protein detected during exponential and stationary phases of yeast- form growth
orf19.1980	0.876	0.203	0.824	0.0201	GIT4	Putative glycerophosphoinositol permease; fungal-specific (no human or murine homolog); possibly an essential gene, disruptants not obtained by UAU1 method; Hap43p-repressed gene
orf19.1981	0.961	0.592	1.022	0.6	0	S. cerevisiae ortholog Imp2p has endopeptidase activity, has role in protein processing involved in protein targeting to mitochondrion and localizes to mitochondrial inner membrane peptidase complex
orf19.1982	0.922	no replicates	1.217	no replicates	#N/A	#N/A
orf19.1983	0.72	no replicates	1.212	no replicates	#N/A	#N/A
orf19.1984	0.524	no replicates	0.917	no replicates	#N/A	#N/A
orf19.1985	0.961	0.726	0.868	0.144	0	Biofilm-induced gene
orf19.1986	0.86	0.0476	0.953	0.282	ARO2	Putative chorismate synthase; fungal-specific (no human or murine homolog); protein level decreased in stationary phase yeast cultures
orf19.1988	1.015	0.897	0.957	0.618	CDC45	Putative DNA replication initiation factor; transcriptionally regulated by interaction with macrophage
orf19.1989	1.037	0.782	0.968	0.56	DCW1	Protein with predicted GPI modification; dfg5 dcw1 double mutant is inviable; not required for wild-type hyphal growth; increased mRNA abundance observed in cyr1 null mutant (yeast-form or hyphal); fungal-specific; Hap43p-induced
orf19.199	1.113	0.0778	0.904	0.226	0	Predicted ORF in Assemblies 19, 20 and 21; hyphal-induced expression; greater mRNA abundance observed in a cyr1 homozygous null mutant than in wild type
orf19.1990	0.838	0.114	0.96	0.561	SNX4	Putative sorting nexin; induced during the mating process
orf19.1991	1.08	0.416	0.965	0.691	0	Ortholog of S. cerevisiae Ptm1p
orf19.1992	0.867	0.146	1.035	0.637	SIR2	Required for wild-type lifespan, asymmetric inheritance of oxidatively damaged proteins, rDNA silencing; regulates phenotypic switching in strain 3153A, not WO-1; partially functionally complements S. cerevisiae sir2 mutant mating defect
orf19.1993	1.044	0.549	0.862	0.0374	0	S. cerevisiae ortholog Rpn9p has structural molecule activity and has role in proteasome assembly, ubiquitin-dependent protein catabolic process
orf19.1994	0.976	0.756	0.967	0.599	0	Ortholog of C. glabrata Cagl0f03113gp
orf19.1995	1.471	0.19	1.821	0.000786	0	0
orf19.1996	0.884	0.48	1.376	0.212	CHA1	Similar to catabolic serine/threonine dehydratases; negatively regulated by Rim101p; expression greater in low iron; regulated on white-opaque switching; filament induced; transposon mutation affects filamentous growth; biofilm-induced
orf19.1997	0.322	no replicates	2.217	no replicates	#N/A	#N/A
orf19.1998	0.924	0.218	1.12	0.0497	0	0
orf19.1999	1.213	0.34	1.088	0.344	0	Predicted ORF in Assemblies 19, 20 and 21; transcription detected in high-resolution tiling array experiments
orf19.20	1.089	0.33	0.809	0.0165	RTS1	Putative serine/threonine-protein phosphatase B-type regulatory subunit; transcription is regulated upon yeast-hyphal switch
orf19.200	1.073	0.535	1.042	0.377	0	Ortholog of C. glabrata Cagl0j02992gp
orf19.2000	0.852	0.203	1.173	0.0289	0	S. cerevisiae ortholog Chl1p has DNA helicase activity, has role in donor selection, negative regulation of DNA recombination, DNA-dependent DNA replication initiation, mitotic sister chromatid cohesion and localizes to nucleus
orf19.2001	0.896	0.352	1.006	0.947	0	0
orf19.2002	0.878	0.315	1.01	0.903	0	S. cerevisiae ortholog Nic96p has structural molecule activity, has role in ribosomal large subunit export from nucleus, nuclear pore organization, protein import into nucleus and localizes to Nic96 complex
orf19.2003	1.108	0.488	1.088	0.184	HNM1	Putative choline/ethanolamine transporter; mutation confers hypersensitivity to toxic ergosterol analog; shows colony morphology-related gene regulation by Ssn6p; clade-associated gene expression
orf19.2005	1.049	0.476	0.935	0.219	REG1	Putative protein phosphatase regulatory subunit; Hap43p-repressed gene; macrophage/pseudohyphal-induced; possibly transcriptionally regulated upon hyphal formation; late-stage biofilm-induced
orf19.2006	0.973	0.595	1.158	0.0733	0	S. cerevisiae ortholog Ypl162cp localizes to fungal-type vacuole membrane
orf19.2006.1	1.425	0.038	1.322	0.00105	COX17	Putative copper metallochaperone; Hap43p-repressed gene; transcription is upregulated in both intermediate and mature biofilms
orf19.2007	1.056	0.606	0.94	0.347	0	S. cerevisiae ortholog Vps54p has role in ascospore wall assembly, Golgi to vacuole transport, retrograde transport, endosome to Golgi and localizes to GARP complex, mitochondrion
orf19.2008	0.996	0.958	0.897	0.104	0	S. cerevisiae ortholog Mri1p has S-methyl-5-thioribose-1-phosphate isomerase activity, has role in L-methionine salvage from methylthioadenosine and localizes to nucleus, cytoplasm
orf19.2009	1.046	0.523	0.835	0.0187	PEX12	S. cerevisiae ortholog Pex12p has ubiquitin-protein ligase activity, has role in protein import into peroxisome matrix and localizes to integral to peroxisomal membrane
orf19.201	1.144	0.253	0.834	0.0158	0	Predicted ORF in Assemblies 19, 20 and 21; unmerged from orf19.202 in a revision of Assembly 21
orf19.2010	1.047	0.811	0.872	0.136	0	0
orf19.2012	0.965	0.7	0.906	0.192	NOT3	Protein with similarity to Not5p, putative transcriptional regulator; not required for adherence to buccal epithelial cells or for virulence in mouse systemic infection; null mutant colonies exhibit slightly decreased filamentation ratio
orf19.2013	0.996	0.961	0.598	3.38e-06	KAR2	Similar to chaperones of Hsp70p family; role in translocation of proteins into the ER; transcriptionally regulated by iron; expression greater in high iron; protein present in exponential and stationary growth phase yeast cultures
orf19.2014	1.019	0.856	0.732	0.000473	BCY1	Protein kinase A regulatory subunit; required for nuclear localization of Tpk1p; physically interacts with Tpk1p; essential; apoptosis-regulated; bcy1 heterozygous or bcy1 tpk2 mutant has filamentous growth defect; planktonic growth-induced
orf19.2015	1.033	no replicates	0.818	no replicates	#N/A	#N/A
orf19.2016	1.042	0.67	0.913	0.139	0	S. cerevisiae ortholog Erg28p has protein binding, bridging, has role in ergosterol biosynthetic process and localizes to endoplasmic reticulum membrane
orf19.2017	0.761	0.00466	1.155	0.00553	0	S. cerevisiae ortholog Rpa49p has role in transcription elongation from RNA polymerase I promoter, regulation of cell size, transcription of nuclear large rRNA transcript from RNA polymerase I promoter
orf19.2018	0.822	0.0272	1.174	0.0267	0	S. cerevisiae ortholog Jjj3p has role in peptidyl-diphthamide biosynthetic process from peptidyl-histidine and localizes to nucleus, cytoplasm
orf19.2018.1	NO DATA	NO DATA	NO DATA	NO DATA	0	Predicted ORF in Assembly 20 and 21; gene has intron; similar to human BLOC1S2
orf19.2018.2	NO DATA	NO DATA	NO DATA	NO DATA	0	0
orf19.2019	1.02	0.827	1.115	0.0631	0	S. cerevisiae ortholog Mrpl16p has structural constituent of ribosome and localizes to mitochondrial large ribosomal subunit
orf19.202	1.001	0.994	1.003	0.962	CDC47	Phosphorylated protein described as having role in control of cell division; RNA abundance regulated by tyrosol and cell density; merged with orf19.201 in Assembly 20; unmerged from orf19.201 in a revision of Assembly 21
orf19.2020	1.043	0.672	0.954	0.671	HGT6	Putative high-affinity glucose transporter of major facilitator superfamily; 20 members of C. albicans glucose transporter family; 12 probable membrane-spanning segments; core stress response, fluconazole-induced; biofilm-induced
orf19.2021	1.292	0.0665	0.967	0.751	HGT8	High-affinity glucose transporter of the major facilitator superfamily; 20 members in the C. albicans glucose transporter family; 12 probable membrane-spanning segments; gene has intron; expressed in rich medium; biofilm-induced
orf19.2022	1.139	no replicates	0.654	no replicates	#N/A	#N/A
orf19.2023	1.273	0.176	1.057	0.493	HGT7	Putative glucose transporter, major facilitator superfamily; glucose-, fluconazole-, Snf3p-induced, expressed at high glucose; upregulated in biofilm; C. albicans glucose transporter family comprises 20 members; 12 TM regions predicted
orf19.2024	0.971	0.77	1.28	0.0333	0	0
orf19.2025	1.378	0.388	0.837	0.431	0	0
orf19.2026	1.017	0.873	0.88	0.106	0	Ortholog of S. cerevisiae UBP13, a putative ubiquitin carboxyl-terminal hydrolase; late-stage biofilm-induced gene
orf19.2028	1.024	0.777	0.955	0.468	MXR1	Putative methionine sulfoxide reductase; flucytosine induced; Plc1p-regulated; upregulated in the presence of human neutrophils; macrophage regulated (gene induced, protein decreased); possibly adherence-induced
orf19.2029	0.99	0.897	0.936	0.332	RFC5	Putative heteropentameric replication factor C subunit; periodic mRNA expression, peak at cell-cycle G1/S phase
orf19.203	1.121	0.239	0.869	0.202	STB3	Putative SIN3-binding protein 3 homolog; caspofungin induced; macrophage/pseudohyphal-repressed
orf19.2030	1.503	0.142	0.979	0.77	0	Plasma membrane-associated protein; greater mRNA abundance observed in a cyr1 or ras1 homozygous null mutant than in wild type; expression upregulated by hypoxia, by ketoconazole and during growth in the mouse cecum
orf19.2031	1.006	0.952	0.842	0.0367	VPS24	Protein similar to S. cerevisiae Vps24p, which is a member of the ESCRT III protein sorting complex; downregulated upon adherence to polystyrene
orf19.2032	1.169	0.599	0.558	0.0222	0	0
orf19.2033	NO DATA	NO DATA	NO DATA	NO DATA	PGA19	Putative GPI-anchored protein; not essential for viability; macrophage-induced gene
orf19.2034	NO DATA	NO DATA	3.223	no replicates	0	0
orf19.2035	0.858	0.569	1.024	0.967	0	0
orf19.2036	1.024	0.719	1.072	0.212	0	0
orf19.2037	1.167	0.101	1.002	0.98	0	0
orf19.2038	1.302	0.276	1.043	0.705	0	0
orf19.2039	0.899	0.0816	0.84	0.0213	MSF1	Putative phenylalanine-tRNA ligase; protein level decreases in stationary phase cultures; Hap43p-repressed gene
orf19.204	1.155	0.106	1.035	0.603	0	0
orf19.2040	0.954	0.741	0.954	0.565	0	S. cerevisiae ortholog Tah18p has oxidoreductase activity, acting on NADH or NADPH, has role in iron-sulfur cluster assembly, oxidation-reduction process and localizes to mitochondrion
orf19.2041	1.026	0.84	1.023	0.807	0	0
orf19.2042	0.925	0.351	1.146	0.187	0	S. cerevisiae ortholog Mss1p has role in mitochondrial tRNA wobble uridine modification and localizes to mitochondrial inner membrane
orf19.2043	0.898	0.35	1.11	0.17	0	0
orf19.2044	0.823	0.124	1.097	0.197	PGA27	Putative GPI-anchored protein
orf19.2045	0.779	0.0823	0.979	0.648	0	S. cerevisiae ortholog Dgk1p has diacylglycerol kinase activity, has role in phosphatidic acid biosynthetic process and localizes to integral to endoplasmic reticulum membrane
orf19.2046	0.842	0.403	0.861	0.0651	POT1-2	Putative peroxisomal 3-ketoacyl CoA thiolase; Hap43p-repressed gene; planktonic growth-induced gene
orf19.2047	1.198	0.0295	0.837	0.0422	0	Putative protein of unknown function; Hap43p-repressed gene; mutation confers hypersensitivity to toxic ergosterol analog, and to amphotericin B
orf19.2048	0.98	0.868	1.151	0.372	0	Transcription is positively regulated by Sfu1p; Hap43p-repressed gene; planktonic growth-induced
orf19.2049	0.849	0.0889	0.929	0.478	0	Plasma membrane-associated protein; heterozygous null mutant displays sensitivity to virgineone
orf19.2050	1.21	0.0164	0.859	0.0555	0	S. cerevisiae ortholog Tgl1p has sterol esterase activity, has role in cellular lipid metabolic process, sterol metabolic process and localizes to lipid particle, integral to membrane
orf19.2051	1.042	0.63	0.813	0.00883	0	0
orf19.2053	1.006	no replicates	0.935	no replicates	#N/A	#N/A
orf19.2054	0.952	0.573	0.869	0.163	FGR15	Putative transcription factor with zinc finger DNA-binding motif; lacks an ortholog in S. cerevisiae; transposon mutation affects filamentous growth; caspofungin induced; mutation causes marginal increase in caspofungin sensitivity
orf19.2055	0.928	0.517	1.028	0.463	NPL6	Putative nuclear protein localization factor; fungal-specific (no human or murine homolog; Hap43p-induced gene
orf19.2057	1.112	0.202	0.874	0.0415	0	S. cerevisiae ortholog Yta12p has ATP binding, metallopeptidase activity, ATPase activity, has role in protein complex assembly, signal peptide processing and localizes to mitochondrial inner boundary membrane, m-AAA complex
orf19.2059	0.558	0.00241	1.284	0.00594	0	0
orf19.206	0.886	0.319	0.886	0.178	0	Putative adhesin-like protein
orf19.2060	1.042	0.606	0.97	0.719	SOD5	Copper- and zinc-containing superoxide dismutase; protective role against oxidative stress; induced by neutrophil contact, hyphal growth, caspofungin, osmotic or oxidative stress; member of a gene family including SOD1, SOD4, SOD5, and SOD6
orf19.2061	1.615	0.453	1.245	0.577	0	Protein not essential for viability
orf19.2062	0.652	0.104	0.578	0.0439	SOD4	Copper- and zinc-containing superoxide dismutase; role in response to host innate immune ROS; regulated on white-opaque switching; ciclopirox olamine induced; caspofungin repressed; family includes SOD1, SOD4, SOD5, SOD6; yeast-associated
orf19.2063	1.08	0.601	1.114	0.33	0	0
orf19.2064	1.111	0.223	0.897	0.191	0	Putative transcription factor with zinc finger DNA-binding motif
orf19.2065	1.086	0.403	0.811	0.00298	0	S. cerevisiae ortholog Dal2p has role in allantoin catabolic process
orf19.2066	0.831	0.136	1.071	0.281	0	S. cerevisiae ortholog Yjr129cp localizes to cytoplasm
orf19.2066.1	NO DATA	NO DATA	NO DATA	NO DATA	ATP18	F1F0 ATP synthase complex subunit; gene has intron
orf19.2067	1.677	0.00653	1.341	0.00423	0	Putative protein with a predicted role in mitochondrial iron metabolism; Hap43p-repressed gene; expression upregulated during growth in the mouse cecum
orf19.2068	1.03	0.727	0.749	0.00214	0	0
orf19.2069	1.056	0.547	0.896	0.139	SMF3	Putative vacuolar iron transporter; alkaline upregulated; caspofungin repressed; transcriptionally activated by Mnl1p under weak acid stress; Hap43p-repressed gene
orf19.207	0.704	0.0397	1.032	0.678	PGA55	Putative GPI-anchored protein; adhesin-like protein; filament induced; regulated by Nrg1p, Tup1p; possibly transcriptionally regulated upon hyphal formation; mRNA binds to She3p and is localized to buds of yeast-form cells and hyphal tips
orf19.2070	0.91	0.358	0.906	0.148	0	S. cerevisiae ortholog Rsc58p has role in transcription elongation from RNA polymerase II promoter, chromatin remodeling, G1/S transition of mitotic cell cycle, nucleosome disassembly and localizes to RSC complex
orf19.2071	1.859	no replicates	NO DATA	NO DATA	0	Predicted ORF in Assemblies 19, 20 and 21; transcription is induced in response to alpha pheromone in SpiderM medium
orf19.2072	1.69	0.21	1.128	0.907	0	S. cerevisiae ortholog Hnm1p has role in transmembrane transport, ethanolamine transport, glycine betaine transport, choline transport
orf19.2073	0.966	0.685	1.066	0.491	0	Predicted ORF in Assemblies 19, 20 and 21; transcriptionally activated by Mnl1p under weak acid stress
orf19.2074	0.87	0.379	1.042	0.475	0	0
orf19.2075	1.117	0.44	0.98	0.788	DFG5	N-linked mannoprotein of cell wall and membrane; possible signal transducer; role in hyphal growth and HWP1 induction in alkaline pH; GPI modification predicted; dfg5 dcw1 double mutant is inviable; caspofungin-induced, fungal-specific
orf19.2076	1.203	0.157	0.89	0.261	0	Putative protein of unknown function; Hap43p-repressed gene; ortholog of S. cerevisiae YMR130W
orf19.2077	1.072	0.447	1.231	0.0524	ZCF9	Putative transcription factor with zinc cluster DNA-binding motif; hypersensitive to toxic ergosterol analog ECC69 and/or ECC1384
orf19.2078	0.979	0.833	0.989	0.83	0	0
orf19.2079	1.196	0.24	1.321	0.00246	PHHB	Transposon mutation affects filamentous growth; late-stage biofilm-induced gene
orf19.2081	1.09	0.427	1.014	0.784	POM152	Putative nuclear pore membrane glycoprotein
orf19.2082	0.876	0.414	0.875	0.057	SAP30	Aspartic-type endopeptidase involved in degradation of alpha pheromone; functional equivalent of S. cerevisiae Bar1p; specific to a-cells; transcription is induced in response to alpha pheromone
orf19.2084	0.891	0.243	0.918	0.298	CDH1	Protein involved in regulation of mitosis, similar to S. cerevisiae Cdh1p, which is an APC/C component; transcriptionally activated by Mnl1p under weak acid stress
orf19.2087	0.946	0.528	1.126	0.174	SAS2	S. cerevisiae ortholog Sas2p has histone acetyltransferase activity, has role in histone exchange, histone acetylation, chromatin silencing at telomere and localizes to SAS acetyltransferase complex, nuclear chromatin
orf19.2088	1.084	0.534	0.911	0.198	0	Putative DNA polymerase epsilon subunit D; null mutant is viable but slow-growing and displays abnormal invasive growth on SD and YPD media
orf19.2089	0.965	0.721	0.927	0.297	0	Hap43p-repressed gene
orf19.209	1.021	0.837	1.085	0.08	DFG10	S. cerevisiae ortholog Dfg10p has role in pseudohyphal growth, dolichol biosynthetic process
orf19.2090	0.722	0.0141	1.258	0.0383	0	Hap43p-induced gene
orf19.2091	1.147	0.378	0.977	0.689	0	Putative NADH dehydrogenase; repressed by nitric oxide, Hap43p-repressed
orf19.2092	1.118	0.265	0.965	0.567	0	Putative peroxisomal cystathionine beta-lyase; Gcn4p-regulated
orf19.2093	1.176	0.152	0.975	0.687	RFA1	Putative DNA replication factor A; RNA abundance regulated by cell cycle, tyrosol and cell density
orf19.2094	0.91	0.116	1.111	0.0735	PDR6	Putative pleiotropic drug resistance regulatory protein 6; transcription is regulated by Nrg1p; transcription is induced in response to alpha pheromone in SpiderM medium
orf19.2095	1.357	0.192	1.067	0.275	0	S. cerevisiae ortholog Fra1p has role in negative regulation of transcription from RNA polymerase II promoter in response to iron and localizes to cytosol
orf19.2097	1.091	0.156	1.166	0.0386	0	S. cerevisiae ortholog Rad5p has role in double-strand break repair, free ubiquitin chain polymerization, postreplication repair, protein polyubiquitination
orf19.2098	1.39	0.0219	0.947	0.624	ARO8	Aromatic transaminase of the Ehrlich fusel oil pathway of aromatic alcohol biosynthesis; Rim101p independent alkaline induction; protein abundance affected by URA3 expression in the CAI-4 strain; Gcn4p-regulated; stationary phase enriched
orf19.2099	0.997	0.944	0.853	0.0495	0	S. cerevisiae ortholog Hir1p has role in transcription elongation from RNA polymerase II promoter, regulation of transcription from RNA polymerase II promoter, DNA replication-independent nucleosome assembly
orf19.21	1.363	0.235	1.056	0.464	0	S. cerevisiae ortholog Sym1p has role in ethanol metabolic process and localizes to mitochondrial inner membrane
orf19.210	1.07	0.579	0.935	0.664	0	S. cerevisiae ortholog Ypl066wp localizes to cytoplasm, cellular bud neck
orf19.2101	1.064	0.566	1.142	0.14	0	Ortholog of C. glabrata Cagl0a00253gp
orf19.2102	0.877	0.108	1.028	0.638	CKB1	Regulatory subunit of protein kinase CK2 (casein kinase II), beta subunit; null mutants are hypersensitive to caspofungin and hydrogen peroxide medium
orf19.2103	2.6	no replicates	NO DATA	NO DATA	0	0
orf19.2104	1.457	0.0156	0.926	0.193	0	S. cerevisiae ortholog Jac1p has chaperone binding, has role in iron-sulfur cluster assembly, aerobic respiration and localizes to mitochondrion
orf19.2105	1.002	0.97	1.19	0.0712	0	Putative pre-mRNA-splicing factor; possibly an essential gene, disruptants not obtained by UAU1 method
orf19.2106	1.134	0.199	1.214	0.134	0	Putative protein of unknown function; Hap43p-repressed gene
orf19.2107	1.65	0.0181	0.954	0.398	MUQ1	Putative choline phosphate cytidylyltransferase/phosphoethanolamine cytidylyltransferase; decreased expression in hyphae compared to yeast-form cells; Hap43p-repressed gene; biofilm-induced
orf19.2107.1	1.582	0.0264	0.627	0.0113	STF2	Protein involved in ATP biosynthesis; decreased expression in hyphae vs yeast-form cells; downregulated by Efg1p, Hap43p; transcription upregulated in clinical isolates from HIV+ patients with oral candidiasis; biofilm-induced
orf19.2108	0.856	0.659	0.566	0.309	SOD6	Copper- and zinc-containing superoxide dismutase; expression regulated during planktonic growth; member of a gene family that includes SOD1, SOD4, SOD5, and SOD6; gene may contain an intron; Hap43p-repressed; biofilm-induced
orf19.211	0.824	0.419	1.065	0.49	0	0
orf19.2110	0.89	0.238	0.957	0.54	0	S. cerevisiae ortholog Ate1p has arginyltransferase activity and has role in protein arginylation
orf19.2111	1.107	0.465	0.928	0.143	0	Ortholog of S. cerevisiae Tfg2p
orf19.2111.2	0.857	0.113	1.081	0.198	RPL38	60S ribosomal ribosomal protein subunit; genes encoding cytoplasmic ribosomal subunits, translation factors, tRNA synthetases are downregulated upon phagocytosis by murine macrophage
orf19.2112	0.865	0.0791	1.035	0.578	0	S. cerevisiae ortholog Prp18p has role in nuclear retention of unspliced pre-mRNA at the site of transcription, generation of catalytic spliceosome for second transesterification step
orf19.2113	0.959	0.617	0.809	0.00319	0	Putative integral peroxisomal membrane protein; Hap43p-repressed gene
orf19.2114	1.288	0.207	1.035	0.748	0	0
orf19.2115	0.836	0.113	1.015	0.711	0	Putative molybdopterin-converting factor; fungal-specific (no human or murine homolog)
orf19.2116	1.097	0.295	0.928	0.252	NAT2	Putative N-terminal acetyltransferase; Hap43p-repressed gene; mutation confers hypersensitivity to toxic ergosterol analog
orf19.2117	1.056	0.608	0.918	0.14	LEU5	Putative mitochondrial carrier protein; Hap43p-repressed gene; transcription is upregulated in both intermediate and mature biofilms
orf19.2119	1.008	0.965	0.965	0.287	NDT80	Activator of CDR1 induction by antifungal drugs; required for wild-type drug resistance; transcriptionally induced upon antifungal drug treatment; similar to S. cerevisiae Ndt80p, which is a meiosis-specific transcriptional regulator
orf19.212	0.973	0.747	0.993	0.935	VPS28	Protein involved in proteolytic activation of Rim101p, which regulates pH response; role in echinocandin, azole sensitivity; similar to S. cerevisiae Vps28p, which is a subunit of the ESCRT I protein sorting complex
orf19.2120	0.612	no replicates	0.722	no replicates	#N/A	#N/A
orf19.2121	0.825	no replicates	0.849	no replicates	#N/A	#N/A
orf19.2122	NO DATA	NO DATA	NO DATA	NO DATA	#N/A	#N/A
orf19.2123	NO DATA	NO DATA	0.01*	no replicates	#N/A	#N/A
orf19.2124	0.994	0.945	0.572	0.000339	0	0
orf19.2125	1.07	0.651	0.886	0.0482	0	0
orf19.2125.1	NO DATA	NO DATA	NO DATA	NO DATA	#N/A	#N/A
orf19.2126	1.408	no replicates	0.882	no replicates	#N/A	#N/A
orf19.2127	1.131	0.39	1	0.996	CST5	Scaffold protein for the mitogen-activated protein (MAP) kinase cascade that regulates mating; required for opaque mating or white biofilm formation in response to mating pheromone; induced in response to pheromone; Hap43p-repressed
orf19.2128	0.929	0.505	1.032	0.645	0	S. cerevisiae ortholog Ylf2p localizes to mitochondrion
orf19.2129	0.921	0.619	1.155	0.359	0	Predicted ORF in Assemblies 19, 20 and 21; possibly an essential gene, disruptants not obtained by UAU1 method
orf19.213	1.288	0.013	0.846	0.0611	0	S. cerevisiae ortholog Rpn12p has role in ubiquitin-dependent protein catabolic process and localizes to proteasome regulatory particle, lid subcomplex, proteasome storage granule
orf19.2131	1.049	0.513	0.872	0.339	0	S. cerevisiae ortholog Tul1p has ubiquitin-protein ligase activity, has role in protein ubiquitination, ubiquitin-dependent protein catabolic process via the multivesicular body sorting pathway and localizes to Golgi apparatus
orf19.2132	1.213	0.0481	0.977	0.501	0	0
orf19.2133	1.113	0.8	1.5	no replicates	LIP4	Secreted lipase, member of a differentially expressed lipase gene family with possible roles in nutrition and/or in creating an acidic microenvironment; expressed more strongly during mucosal infections than during systemic infections
orf19.2135	0.953	0.749	0.982	0.911	TSM1	Putative transcription initiation factor TFIID subunit; transcription is upregulated in clinical isolates from HIV+ patients with oral candidiasis; transcription is regulated by Nrg1p
orf19.2136	0.684	no replicates	0.987	no replicates	#N/A	#N/A
orf19.2137	0.857	0.37	0.968	0.678	0	0
orf19.2138	0.934	0.321	0.878	0.0526	ILS1	Putative isoleucyl-tRNA synthetase, the target of drugs including the cyclic beta-amino acid icofungipen/PLD-118/BAY-10-8888 and mupirocin; protein present in exponential and stationary growth phase yeast cultures
orf19.2143	0.916	0.555	1.083	0.338	0	S. cerevisiae ortholog Rtt10p localizes to cytoplasm
orf19.2146	1.103	0.328	0.908	0.0948	0	S. cerevisiae ortholog Hat2p has histone binding, histone acetyltransferase activity and has role in chromatin assembly or disassembly, histone acetylation, chromatin silencing at telomere
orf19.2149	1.142	0.143	0.807	0.00217	0	Putative sulfate permease; Hap43p-repressed gene; S. cerevisiae ortholog YPR003C localizes to the endoplasmic reticulum
orf19.215	0.849	0.305	1.028	0.719	0	0
orf19.2150	1.086	0.402	0.994	0.944	0	S. cerevisiae ortholog Aim45p localizes to mitochondrion
orf19.2151	0.956	0.675	0.84	0.0216	NAG6	Protein required for wild-type mouse virulence and wild-type cycloheximide resistance; putative GTP-binding motif; similar to S. cerevisiae Yor165Wp; in gene cluster that encodes enzymes of GlcNAc catabolism; no human or murine homolog
orf19.2154	1.109	0.395	0.99	0.849	HXK1	N-acetylglucosamine (GlcNAc) kinase; involved in GlcNAc utilization; required for wild-type hyphal growth and mouse virulence; gene expression is GlcNAc-induced; induced in response to alpha pheromone in SpiderM medium
orf19.2156	0.974	0.791	1.142	0.0693	NAG1	Glucosamine-6-phosphate deaminase; enzyme of N-acetylglucosamine utilization; required for wild-type hyphal growth and mouse virulence; converts glucosamine 6-P to fructose 6-P; reaction is reversible in vitro; gene is GlcNAc-induced
orf19.2157	1.158	0.555	1.009	0.936	DAC1	N-acetylglucosamine-6-phosphate (GlcNAcP) deacetylase; enzyme of N-acetylglucosamine utilization; required for wild-type hyphal growth and virulence in mouse systemic infection; gene is GlcNAc-induced
orf19.2158	0.237	0.0135	0.439	0.00241	NAG3	Putative transporter of the major facilitator superfamily (MFS); similar to Nag4p; required for wild-type mouse virulence and cycloheximide resistance; in gene cluster that includes genes encoding enzymes of GlcNAc catabolism
orf19.2159	0.166	no replicates	0.678	no replicates	#N/A	#N/A
orf19.216	1.077	0.265	1.093	0.246	0	Predicted ORF in Assemblies 19, 20 and 21; ketoconazole-induced; upregulation correlates with clinical development of fluconazole resistance
orf19.216.1	NO DATA	NO DATA	NO DATA	NO DATA	0	0
orf19.2160	0.786	0.602	0.228	0.421	NAG4	Putative transporter; fungal-specific; similar to Nag3p and to S. cerevisiae Ypr156Cp and Ygr138Cp; required for wild-type mouse virulence and wild-type cycloheximide resistance; gene cluster encodes enzymes of GlcNAc catabolism
orf19.2163	0.954	0.546	0.847	0.0106	0	Ortholog of S. cerevisiae Ybr074wp
orf19.2164	1.137	no replicates	0.697	no replicates	#N/A	#N/A
orf19.2164.1	NO DATA	NO DATA	NO DATA	NO DATA	MFA1	Mating pheromone, a-factor; produced in opaque MTLa cells; required for mating competence of MTLa cells, but not MTLalpha; induced by alpha-factor
orf19.2165	1.068	0.66	1.347	0.0124	0	Predicted ORF in Assemblies 19, 20 and 21; induced by nitric oxide
orf19.2166	1.046	0.702	0.958	0.561	VMA5	Putative vacuolar H(+)-ATPase; plasma membrane localized
orf19.2167	0.766	0.0184	1.287	0.0184	0	S. cerevisiae ortholog Rrp14p has role in ribosomal small subunit biogenesis, ribosomal large subunit biogenesis and localizes to nucleolus, cytosolic large ribosomal subunit
orf19.2168	0.85	0.289	0.345	no replicates	0	Late-stage biofilm-induced gene
orf19.2168.3	1.086	0.478	1.032	0.646	0	S. cerevisiae ortholog Yop1p has role in nuclear pore complex assembly, vesicle-mediated transport, endoplasmic reticulum organization and localizes to endoplasmic reticulum, integral to membrane
orf19.2169	1.687	0.512	NO DATA	NO DATA	0	0
orf19.217	0.234	0.267	0.806	0.14	0	0
orf19.2170	0.819	0.0988	1.106	0.167	PHM7	Putative transporter; fungal-specific (no human or murine homolog); Hog1p-downregulated; downregulated in response to 17-beta-estradiol, ethynyl estradiol; Hap43p-induced gene
orf19.2172	1.606	0.0193	1.174	0.208	ARA1	D-Arabinose dehydrogenase; in dehydro-D-arabinono-1,4-lactone biosynthesis; NADP+ cofactor; active toward D-arabinose, L-fucose, L-xylose, L-galactose; inhibited by metal ions, thiol group-specific reagents; induced on polystyrene adherence
orf19.2173	1.2	0.0591	0.906	0.0903	MAF1	Putative negative regulator of RNA polymerase III; decreased expression in hyphae compared to yeast-form cells; caspofungin repressed
orf19.2174	1.127	0.198	0.97	0.688	RAD57	Putative DNA recombination and repair protein; transcriptionally induced by interaction with macrophage; transcription is regulated by Nrg1p, Mig1p, and Tup1p; essential protein; S. cerevisiae ortholog is essential
orf19.2175	0.93	0.571	1.114	0.207	0	Putative mitochondrial cell death effector; induced by nitric oxide
orf19.2176	0.804	0.0485	0.906	0.185	IFM3	Hap43p-repressed gene; Plc1p-regulated; overlaps orf19.2177
orf19.2177	0.574	no replicates	1.6	no replicates	0	Hap43p-induced gene; overlaps IFM3/orf19.2176
orf19.2178	0.987	0.932	0.973	0.607	MRS4	Putative membrane transporter localized to the mitochondrial membrane; Hap43p-induced gene
orf19.2178.1	NO DATA	NO DATA	NO DATA	NO DATA	0	0
orf19.2179	1.033	0.892	1.101	0.262	SIT1	Transporter of ferrichrome siderophores, not ferrioxamine B; required for wild-type invasion of human epithelial cells in vitro, but not for wild-type systemic virulence in mouse; transcription regulated by iron, Sfu1p, Rfg1p, Tup1p, Hap43p
orf19.2179.2	0.904	0.214	1.049	0.249	RPS10	Ribosomal protein S10; downregulated in the presence of human whole blood or polymorphonuclear (PMN) cells
orf19.218	0.997	no replicates	3.763	0.453	BUD20	Protein similar to S. cerevisiae Bud20p, which affects bud site selection; transposon mutation affects filamentous growth
orf19.2180	1.003	0.981	0.869	0.166	0	Ortholog of C. glabrata Cagl0k04433gp
orf19.2181	0.711	no replicates	0.514	no replicates	0	ORF Predicted by Annotation Working Group; overlaps orf19.2180
orf19.2182	1.105	0.24	0.81	0.0152	BLM3	Protein similar to S. cerevisiae Blm10p; transcription is regulated by Nrg1p and Mig1p
orf19.2183	0.751	0.0142	1.017	0.668	KRE30	YEF3-subfamily ABC family protein, predicted not to be a transporter; downregulated during core stress response; mutation confers hypersensitivity to amphotericin B
orf19.2184	1.116	0.185	1.057	0.508	0	Predicted ORF in Assemblies 19, 20 and 21; clade-associated gene expression
orf19.2185	0.834	0.386	1.162	0.0567	NSA1	Putative 66S pre-ribosomal particles conmponent; Hap43p-induced gene; decreased expression in response to prostaglandins
orf19.2186	0.981	0.818	0.946	0.511	0	S. cerevisiae ortholog Seh1p localizes to fungal-type vacuole membrane, Seh1-associated complex, Nup107-160 complex
orf19.2187	1.055	0.577	0.874	0.109	ALG7	Protein involved in cell wall mannan biosynthesis; mutation confers hypersensitivity to tunicamycin; transcription is elevated in chk1, nik1, and sln1 homozygous null mutants; possibly essential gene, disruptants not obtained by UAU1 method
orf19.2190	1.022	0.864	0.859	0.304	VRP1	Verprolin-related protein involved in actin cytoskeleton organization and polarized morphogenesis; interacts with Wal1p and Myo5p; downregulated upon adherence to polystyrene
orf19.2191	0.879	0.541	1.106	0.211	0	Ortholog of S. cerevisiae Rrt2p
orf19.2191.1	NO DATA	NO DATA	NO DATA	NO DATA	0	0
orf19.2192	1.125	0.32	0.893	0.0685	GDH2	Putative NAD-specific glutamate dehydrogenase; fungal-specific (no human or murine homolog); transcription is regulated by Nrg1p, Mig1p, Tup1p, and Gcn4p; stationary phase enriched protein; biofilm-induced
orf19.2193	0.751	0.00842	1.083	0.304	PRS5	Putative 5-phospho-ribosyl-1(alpha)-pyrophosphate synthetase; Hap43p-induced gene; downregulated during core stress response
orf19.2194	1.022	0.784	1.074	0.302	0	Phosphorylated protein of unknown function
orf19.2195	NO DATA	NO DATA	NO DATA	NO DATA	0	0
orf19.2196	0.971	0.871	1.048	0.335	0	S. cerevisiae ortholog Cue3p has ubiquitin binding and localizes to cytoplasm
orf19.2197	1.202	0.58	0.522	0.564	0	0
orf19.2198	0.861	0.217	1.215	0.0188	FLC3	Protein involved in heme uptake; putative FAD transporter, similar to S. cerevisiae Flc3p
orf19.2199	1.077	0.447	0.974	0.649	PHO86	Putative endoplasmic reticulum protein; possibly adherence-induced
orf19.22	1.137	0.192	1.121	0.206	0	Transcription is positively regulated by Sfu1p
orf19.22.1	NO DATA	NO DATA	NO DATA	NO DATA	0	Pseudogene; added to Assembly 21 based on comparative genome analysis
orf19.220	0.728	0.0335	0.64	0.000506	PIR1	1,3-beta-glucan-linked structural cell wall protein; N-mannosylated, O-glycosylated by Pmt1p; tandem repeats; cell wall defect in heterozygous mutant; hyphal repressed; Hog1p, fluconazole, hypoxia induced; iron, Efg1p, Plc1p, temp regulated
orf19.2200	1.004	0.964	1.039	0.596	0	Ortholog of C. glabrata Cagl0l03333gp
orf19.2201	0.815	0.13	1.271	0.00702	0	S. cerevisiae ortholog Cbp6p has ribosome binding, has role in mitochondrial respiratory chain complex III assembly, positive regulation of mitochondrial translation and localizes to mitochondrial ribosome
orf19.2202	2.093	0.0455	1.508	0.0251	0	Predicted ORF in Assemblies 19, 20 and 21; transcription is induced in response to alpha pheromone in SpiderM medium
orf19.2203	1.2	no replicates	NO DATA	NO DATA	0	0
orf19.2203.1	NO DATA	NO DATA	NO DATA	NO DATA	0	ORF added to Assembly 21 based on comparative genome analysis; overlaps dubious orf19.2203
orf19.2204	1.102	0.357	1.054	0.462	0	Ortholog of S. cerevisiae Ypl264cp
orf19.2204.2	1.003	0.973	0.924	0.298	0	S. cerevisiae ortholog Rho2p has GTPase activity and localizes to membrane fraction
orf19.2208	0.926	0.375	1.062	0.295	0	S. cerevisiae ortholog Nst1p has role in response to salt stress and localizes to cytoplasm
orf19.2209	0.823	0.0615	0.962	0.4	YVC1	Protein similar to S. cerevisiae Yvc1p; transcription is repressed in response to alpha pheromone in SpiderM medium
orf19.2210	1.003	0.981	0.831	0.34	0	0
orf19.2211	1.27	no replicates	NO DATA	NO DATA	0	0
orf19.2212	1.497	0.137	1.244	0.495	0	0
orf19.2213	0.855	0.102	1.048	0.676	0	0
orf19.2214	0.94	0.535	1.074	0.312	0	S. cerevisiae ortholog Mrpl7p has structural constituent of ribosome and localizes to mitochondrial large ribosomal subunit
orf19.2215	0.881	0.302	1.164	0.0592	GLE1	Putative nucleoporin; moderately induced at 42 degrees C
orf19.2216	1.227	0.0833	0.945	0.301	PDS5	Putative protein with a predicted role in establishment and maintenance of sister chromatid condensation and cohesion; cell-cycle regulated periodic mRNA expression
orf19.2217	NO DATA	NO DATA	NO DATA	NO DATA	#N/A	#N/A
orf19.2218	NO DATA	NO DATA	NO DATA	NO DATA	#N/A	#N/A
orf19.2219	0.927	0.578	0.89	0.16	ORF298	Predicted ORF in retrotransposon Tca3 with similarity to Gag-Pol, which encodes nucleocapsid-like protein, reverse transcriptase, protease, and integrase; transcription is a-specific, alpha-factor induced; mRNA binds to She3p
orf19.2220	NO DATA	NO DATA	0.791	0.518	0	Hap43p-repressed gene; induced by Rgt1p
orf19.2221	0.848	no replicates	0.644	no replicates	#N/A	#N/A
orf19.2222	0.975	0.846	0.938	0.468	0	Putative casein kinase; plasma membrane-localized
orf19.2222.1	1.021	no replicates	1.144	no replicates	#N/A	#N/A
orf19.2223	NO DATA	NO DATA	NO DATA	NO DATA	#N/A	#N/A
orf19.2224	0.916	no replicates	0.965	no replicates	#N/A	#N/A
orf19.2225	1.21	no replicates	0.582	no replicates	#N/A	#N/A
orf19.2226	NO DATA	NO DATA	1.3	no replicates	#N/A	#N/A
orf19.2227	1.122	0.524	1.645	0.000387	0	Biofilm-induced gene; repressed by nitric oxide
orf19.2228	1.031	0.813	0.947	0.486	0	S. cerevisiae ortholog Twf1p has actin monomer binding, has role in sequestering of actin monomers and localizes to mating projection tip
orf19.2229	1.054	0.621	0.975	0.79	0	Ortholog of C. glabrata Cagl0k08052gp
orf19.223	1.002	0.985	1.039	0.56	0	Putative serine/threonine protein kinase; Hap43p-repressed gene; increased expression in response to prostaglandins; late-stage biofilm-induced; possibly an essential gene, disruptants not obtained by UAU1 method
orf19.2230	1.012	0.878	1.166	0.0407	0	Putative pre-mRNA-splicing factor; decreased transcription is observed upon benomyl treatment
orf19.2231	1.082	0.536	1.238	0.0241	0	0
orf19.2232	0.864	0.292	1.046	0.432	RPL11	Ribosomal protein; genes encoding cytoplasmic ribosomal subunits, translation factors, tRNA synthetases are downregulated upon phagocytosis by murine macrophage; colony morphology-related gene regulation by Ssn6p; Hap43p-induced
orf19.2233	1.187	0.195	0.727	0.00282	PRE2	Putative proteasome beta-5 subunit; macrophage-induced protein
orf19.2236	0.778	0.044	1.044	0.403	FHL1	Transcription factor that forms a heterodimer with Ifh1p that is tethered to promoters by Tbf1p; positively regulates rRNA and ribosomal protein gene transcription
orf19.2237	0.688	0.495	1.213	0.882	SPR1	Putative GPI-anchored protein; not essential for viability; similar to S. cerevisiae Spr1p, which is a sporulation-specific exo-1,3-beta-glucanase
orf19.2237.1	NO DATA	NO DATA	NO DATA	NO DATA	0	Predicted ORF in Assembly 20 and 21; gene has intron
orf19.2238	0.853	0.201	0.948	0.617	LTE1	Protein similar to S. cerevisiae Lte1p; transcription is repressed in response to alpha pheromone in SpiderM medium
orf19.2239	0.927	no replicates	0.931	no replicates	#N/A	#N/A
orf19.224	0.235	no replicates	2.2	no replicates	#N/A	#N/A
orf19.2240	NO DATA	NO DATA	NO DATA	NO DATA	#N/A	#N/A
orf19.2241	1.072	0.708	0.997	0.97	PST1	Putative 1,4-benzoquinone reductase; biofilm induced; hyphal-induced expression, regulated by Cyr1p, Ras1p, Efg1p, Nrg1p, Rfg1p, Tup1p; Hap43p-induced gene
orf19.2242	0.992	0.938	0.77	0.0308	PRB1	Endoprotease B; regulated by heat, carbon source (GlcNAc-induced), nitrogen, macrophage response, human neutrophils; D200-H232-S389 catalytic triad; similar to (does not replace) S. cerevisiae vacuolar B protease Prb1p; biofilm-induced
orf19.2244	2.616	0.000317	0.603	0.00051	0	Similar to oxidoreductases and to S. cerevisiae Yjr096wp; transcription is negatively regulated by Sfu1p; increased transcription upon benomyl treatment; decreased expression in an ssr1 null mutant; Hap43p-repressed gene
orf19.2245	0.91	0.423	0.849	0.0387	YPT72	Vacuolar Rab small monomeric GTPase involved in vacuolar biogenesis; involved in filamentous growth and virulence
orf19.2246	0.882	0.174	1.082	0.446	0	S. cerevisiae ortholog Ypl199cp localizes to cytoplasm
orf19.2247	1.129	0.72	1.08	0.698	0	0
orf19.2248	1.115	0.487	0.83	0.0649	ARE2	Acyl CoA:sterol acyltransferase (ASAT); uses cholesterol and oleoyl-CoA substrates; protoberberine derivative drug inhibits enzyme activity; 7 putative transmembrane regions; ketoconazole-induced; Hap43p-repressed; biofilm-induced
orf19.2249	0.985	0.838	1.054	0.361	0	Putative metalloprotease of the mitochondrial inner membrane; expression downregulated in an ssr1 null mutant
orf19.225	0.947	0.637	0.968	0.686	0	Hap43p-repressed gene
orf19.2250	0.923	0.305	1.316	0.0134	SPE3	S. cerevisiae ortholog Spe3p has spermidine synthase activity, has role in pantothenate biosynthetic process, spermidine biosynthetic process and localizes to nucleus, cytoplasm
orf19.2251	0.645	0.00213	1.39	0.00336	AAH1	Protein not essential for viability; similar to S. cerevisiae Aah1p, which is an adenine deaminase involved in purine salvage and nitrogen catabolism; shows colony morphology-related gene regulation by Ssn6p; Hog1p-, biofilm-, CO2-induced
orf19.2252	0.902	0.446	1.03	0.736	0	0
orf19.2253	0.281	0.336	1.043	0.836	0	Predicted ORF in Assemblies 19, 20 and 21; expression is regulated upon white-opaque switching; transcription is repressed in response to alpha pheromone in SpiderM medium
orf19.2256	0.879	0.174	1.189	0.0461	0	S. cerevisiae ortholog Ycr051wp localizes to nucleus, cytoplasm
orf19.2257	1.088	0.234	0.913	0.272	0	S. cerevisiae ortholog Ynr021wp localizes to endoplasmic reticulum
orf19.2258	1.059	0.515	1.001	0.995	0	0
orf19.2259	0.985	0.866	1.064	0.369	0	0
orf19.226	0.788	no replicates	0.758	no replicates	#N/A	#N/A
orf19.2260	0.843	0.103	1.132	0.033	0	Putative transcription factor with zinc finger DNA-binding motif
orf19.2261	1.013	0.906	1.375	0.0182	0	S. cerevisiae ortholog Hsh49p has RNA binding, has role in nuclear mRNA splicing, via spliceosome and localizes to U2-type prespliceosome, U2 snRNP
orf19.2262	11.28	0.00238	6.234	5.68e-10	0	Protein similar to quinone oxidoreductases; increased transcription upon benomyl treatment; induced by nitric oxide; oxidative stress-induced via Cap1p; stationary-phase enriched protein
orf19.2263	0.803	0.463	0.959	0.578	0	0
orf19.2264	0.744	0.0329	0.975	0.743	OLE2	Protein with similarity to fatty acid desaturase (stearoyl-CoA desaturase); homozygous null mutant shows decreased production of prostaglandin E2
orf19.2265	0.997	0.956	0.975	0.704	0	S. cerevisiae ortholog Snf12p has role in nucleosome mobilization and localizes to SWI/SNF complex
orf19.2266	0.909	0.334	1.057	0.62	0	0
orf19.2267	1.126	0.38	1.006	0.923	RFA2	Putative DNA replication factor A; RNA abundance regulated by cell cycle, tyrosol and cell density
orf19.2268	1.064	0.399	0.918	0.0107	RCK2	Predicted MAP kinase-activated protein kinase, similar to S. cerevisiae serine/threonine protein kinase Rck2p; induced by osmotic stress via Hog1p; macrophage/pseudohyphal-repressed; mutants are sensitive to rapamycin
orf19.2269	1.099	0.427	0.864	0.0861	0	Putative 3-phosphoserine phosphatase; fungal-specific (no human or murine homolog); increased transcription observed upon benomyl treatment or in an azole-resistant strain that overexpresses MDR1; early-stage biofilm-induced
orf19.227	0.921	0.456	1.226	0.0109	COX7	Putative cytochrome c oxidase; flucytosine induced; repressed by nitric oxide
orf19.2270	1.183	0.289	1.254	0.000899	SMF12	Protein similar to S. cerevisiae Smf1p, a manganese transporter; Gcn4p-regulated; alkaline upregulated; caspofungin repressed; not essential for viability; Hap43p-induced gene
orf19.2272	0.935	0.526	0.954	0.354	AFT2	Putative transcription factor with a role in colony morphology and virulence; functionally complements S. cerevisiae aft1 mutant growth defect
orf19.2274	0.88	0.356	0.931	0.75	0	0
orf19.2275	0.902	0.28	1.083	0.203	0	S. cerevisiae ortholog Mnp1p has role in aerobic respiration and localizes to mitochondrion
orf19.2276	0.971	0.712	1.112	0.371	0	S. cerevisiae ortholog Rpb9p has RNA-directed RNA polymerase activity and has role in transcription-coupled nucleotide-excision repair, transcription initiation from RNA polymerase II promoter
orf19.2277	1.024	0.77	0.919	0.131	TPK2	Catalytic subunit of cAMP-dependent protein kinase (PKA), isoform of Tpk1p; required for wild-type epithelial cell damage and engulfment and oral (not systemic) virulence in mouse; involved in control of morphogenesis and stress response
orf19.2278	1.147	0.301	0.893	0.146	0	Putative 20S proteasome assembly protein; filament induced; transcription is induced in response to alpha pheromone in SpiderM medium
orf19.2280	1.381	0.215	1.119	0.529	ZCF10	Putative transcription factor with zinc cluster DNA-binding motif
orf19.2281	0.993	0.941	0.794	0.206	0	0
orf19.2282	0.968	0.873	1.005	0.989	0	0
orf19.2283	1.118	0.29	0.987	0.776	DQD1	Putative 3-dehydroquinate dehydratase; biofilm-induced gene; ketoconazole-repressed; macrophage-downregulated protein abundance
orf19.2284	0.931	0.571	0.73	0.000857	0	Hap43p-repressed gene; biofilm-induced
orf19.2285	17.63	0.00476	14.65	3.35e-05	0	Increased transcription is observed upon benomyl treatment
orf19.2286	0.748	0.014	1.13	0.0406	0	Putative deoxyhypusine hydroxylase; required for biofilm formation; ketoconazole-induced; protein level decreases in stationary phase cultures
orf19.2287	0.791	0.102	1.487	0.000291	RPA12	Putative DNA-directed RNA polymerase I; induced upon adherence to polystyrene
orf19.2288	0.981	0.836	0.938	0.433	CCT5	T-complex protein 1, epsilon subunit; protein present in exponential and stationary growth phase yeast cultures
orf19.2289	1.106	0.279	0.865	0.0866	ARP3	Protein with Myo5p-dependent localization to cortical actin patches at hyphal tip; mutation confers hypersensitivity to cytochalasin D
orf19.229	0.954	0.357	1.022	0.708	0	0
orf19.2290	0.985	0.9	0.915	0.354	TOR1	Protein similar to TOR family phosphatidylinositol kinases; mutation confers resistance to rapamycin; involved in regulation of ribosome biogenesis, starvation response, and adhesion
orf19.2291	NO DATA	NO DATA	NO DATA	NO DATA	#N/A	#N/A
orf19.2292	1.058	no replicates	0.899	no replicates	#N/A	#N/A
orf19.2293	NO DATA	NO DATA	NO DATA	NO DATA	#N/A	#N/A
orf19.2294	1.495	no replicates	1.145	no replicates	#N/A	#N/A
orf19.2294.1	1.545	no replicates	1.123	no replicates	#N/A	#N/A
orf19.2295	1.289	no replicates	1.145	no replicates	#N/A	#N/A
orf19.2296	1.412	0.201	0.86	0.345	0	Protein with similarity to mucins; ketoconazole-induced; fluconazole-downregulated; mRNA abundance increased in a cyr1 mutant than in wild type; colony morphology-related gene regulation by Ssn6p; late-stage biofilm-induced
orf19.2297	1.017	0.756	1.065	0.279	ARL3	Putative Ras superfamily GTPase; induced by nitric oxide independent of Yhb1p
orf19.2298	0.957	0.561	0.875	0.0312	WBP1	Putative oligosaccharyltransferase subunit
orf19.2299	0.845	0.13	1.191	0.182	0	S. cerevisiae ortholog Urm1p has protein tag and has role in invasive growth in response to glucose limitation, protein urmylation, cell budding, cellular response to oxidative stress, tRNA wobble position uridine thiolation
orf19.23	1.263	0.0533	1.243	0.00744	RTA3	Similar to S. cerevisiae Rta1p (role in 7-aminocholesterol resistance) and Rsb1p (flippase); putative membrane protein; putative drug-responsive regulatory site; induced by fluphenazine, estradiol, ketoconazole, caspofungin
orf19.230	0.909	0.348	1.004	0.948	0	Hap43p-induced gene
orf19.2301	1.01	0.94	0.793	0.0233	0	S. cerevisiae ortholog Nas2p has role in proteasome regulatory particle assembly and localizes to nucleus, cytosol
orf19.2302	1.274	0.0241	1.025	0.761	0	0
orf19.2303	0.879	0.192	1.08	0.396	FGR16	Protein lacking an ortholog in S. cerevisiae; transposon mutation affects filamentous growth; fluconazole-downregulated
orf19.2304	0.995	0.963	1.07	0.302	0	Protein similar to S. cerevisiae Gvp36p; transposon mutation affects filamentous growth
orf19.2305	1.051	0.534	1.268	0.0279	0	S. cerevisiae ortholog Gim4p has tubulin binding, has role in tubulin complex assembly and localizes to prefoldin complex
orf19.2306	1.07	0.19	1.137	0.31	0	S. cerevisiae ortholog Adi1p has oxidoreductase activity, acting on single donors with incorporation of molecular oxygen, incorporation of two atoms of oxygen and has role in L-methionine salvage from methylthioadenosine
orf19.2307	0.784	0.012	1.074	0.494	0	S. cerevisiae ortholog Pfs2p has role in mRNA cleavage, mRNA polyadenylation and localizes to mRNA cleavage and polyadenylation specificity factor complex
orf19.2308	1.236	0.0516	0.936	0.214	0	Hap43p-repressed gene; biofilm- and planktonic growth-induced gene
orf19.2309	0.723	0.00823	1.05	0.252	0	Hap43p-induced gene
orf19.2309.2	0.999	0.992	0.981	0.677	RPL2	Putative 60S ribosomal protein L2; Hap43p-induced gene; shows downregulation in infected rabbit kidney in SC5314, but not NGY152, strain background
orf19.231	1.011	0.871	0.832	0.034	APL2	Phosphorylated protein of unknown function; mutation confers hypersensitivity to toxic ergosterol analog
orf19.2310	0.991	0.969	0.737	0.259	0	Putative single-stranded nucleic acid binding protein; biofilm-induced gene; ortholog of S. cerevisiae RRT5
orf19.2310.1	0.922	0.375	1.091	0.287	RPL29	Ribosomal protein L29; transcription is induced upon germ tube formation; shows colony morphology-related gene regulation by Ssn6p; intron in 5'-UTR
orf19.2311	0.653	no replicates	0.862	no replicates	RPL82	Predicted ribosomal protein; genes encoding cytoplasmic ribosomal subunits, translation factors, and tRNA synthetases are downregulated upon phagocytosis by murine macrophage
orf19.2312	1.534	0.378	1.799	no replicates	0	Protein similar to ferric reductase Fre10p; possibly an essential gene, disruptants not obtained by UAU1 method
orf19.2313	1.537	0.00649	0.907	0.104	0	Hap43p-repressed gene
orf19.2314	0.723	0.0212	1.479	0.00388	0	Hap43p-induced gene; mutation confers hypersensitivity to 5-fluorocytosine (5-FC), 5-fluorouracil (5-FU), and tubercidin (7-deazaadenosine)
orf19.2315	0.833	0.11	0.949	0.539	0	Putative transcription factor with bZIP DNA-binding motif
orf19.2317	0.949	0.883	0.834	0.41	0	Predicted ORF in Assemblies 19, 20 and 21; transcription is induced in response to alpha pheromone in SpiderM medium
orf19.2318.1	0.932	0.215	0.983	0.806	0	S. cerevisiae ortholog Kei1p has inositol phosphoceramide synthase regulator activity, has role in inositol phosphorylceramide metabolic process and localizes to integral to Golgi membrane, inositol phosphoceramide synthase complex
orf19.2319	0.751	0.0363	1.237	0.0184	0	Putative nucleolar protein with a predicted role in pre-rRNA processing; Hap43p-induced gene; downregulated in core stress response
orf19.232	0.944	0.508	1.002	0.953	0	RNA polymerase II mediator complex subunit; possibly an essential gene, disruptants not obtained by UAU1 method
orf19.2320	0.859	0.388	1.103	0.159	0	Putative serine/threonine-protein kinase; possibly an essential gene, disruptants not obtained by UAU1 method
orf19.2322.3	1.142	0.287	0.825	0.0311	0	Ortholog of S. cerevisiae Erp5p
orf19.2323	0.755	no replicates	0.53	no replicates	#N/A	#N/A
orf19.2324	0.942	0.496	1.063	0.368	UBA4	Putative ubiquitin activating protein; Hap43p-repressed gene; increased expression in response to prostaglandins; clade-associated gene expression
orf19.2325	1.022	0.837	1.168	0.118	0	Ortholog of S. cerevisiae Tfc6p
orf19.2326	0.791	0.0165	1.085	0.185	0	S. cerevisiae ortholog Esc2p has role in chromatin silencing at silent mating-type cassette, intra-S DNA damage checkpoint, double-strand break repair via homologous recombination, mitotic sister chromatid cohesion
orf19.2328	1.164	0.114	0.976	0.597	0	0
orf19.2329.1	0.915	0.186	1.005	0.903	RPS17B	Ribosomal protein 17B; genes encoding cytoplasmic ribosomal subunits, translation factors, tRNA synthetases are downregulated upon phagocytosis by murine macrophages; Hap43p-induced gene
orf19.233	NO DATA	NO DATA	2.245	no replicates	#N/A	#N/A
orf19.233.1	1.04	0.852	1.064	0.732	HRT1	Protein similar to S. cerevisiae Hrt1p, which is a component of a nuclear ubiquitin-protein ligase complex involved in cell cycle control; induced under hydroxyurea treatment
orf19.2330	0.676	0.0016	0.992	0.905	0	Putative U3 snoRNA-associated protein; Hap43p-induced gene; transposon mutation affects filamentous growth; decreased expression in response to prostaglandins
orf19.2331	0.923	0.429	0.951	0.359	ADA2	Putative transcriptional coactivator; cell wall integrity role; required for wild-type transcriptional response to caspofungin; mutant is caspofungin hypersensitive; role in regulation with Cas5p; zinc finger DNA-binding motif
orf19.2332	0.41	0.441	2.7	no replicates	0	0
orf19.2333	1.333	0.125	1.277	0.00138	0	S. cerevisiae ortholog Tda3p has role in retrograde transport, endosome to Golgi and localizes to late endosome
orf19.2334	1.191	0.0874	0.985	0.827	BIG1	Endoplasmic reticulum (ER) protein required for beta-1,6-glucan synthesis, filamentation, adhesion, and virulence; ortholog of S. cerevisiae Big1p
orf19.2335	1.108	0.105	1.005	0.944	0	Putative aspartyl aminopeptidase; stationary phase enriched protein; mutation confers hypersensitivity to 5-fluorouracil (5-FU); Hog1p-induced; planktonic growth-induced
orf19.2336	1.704	0.0377	1.048	0.711	0	Ortholog of C. glabrata Cagl0g07667gp
orf19.2337	1.026	0.763	1.063	0.23	ALP1	Cysteine transporter; fungal-specific (no human or murine homolog)
orf19.234	1.086	0.354	0.85	0.0689	PHA2	Putative prephenate dehydratase; Hap43p-repressed gene; expression downregulated in an ssr1 null mutant
orf19.2340	1.375	0.0661	0.66	0.00138	CDC48	Putative microsomal ATPase; plasma membrane-localized; regulated by Gcn2p and Gcn4p; induced by amino acid starvation (3-AT treatment); macrophage/pseudohyphal-repressed; protein levels decrease in stationary phase yeast cultures
orf19.2341	1.329	0.135	0.78	0.00523	HNT1	Protein with similarity to protein kinase C inhibitor-I; protein level decreases in stationary phase cultures
orf19.2342	1.1	0.162	0.761	0.0169	SFT2	Putative membrane protein; transcription is regulated by Mig1p
orf19.2343	1.071	0.279	0.86	0.0413	VPS23	Protein involved in proteolytic activation of Rim101p, which regulates pH response; similar to S. cerevisiae Stp22p/Vps23p, which is a member of the ESCRT I protein sorting complex
orf19.2343.1	NO DATA	NO DATA	NO DATA	NO DATA	0	Putative vacuolar H+ ATPase subunit e of the V-ATPase V0 subcomplex; added to Assembly 21 based on comparative genome analysis
orf19.2344	1.498	0.0819	0.788	0.0212	ASR1	Putative heat shock protein; transcription regulated by cAMP, osmotic stress, ciclopirox olamine, ketoconazole; negatively regulated by Cyr1p, Ras1p; colony morphology-related regulation by Ssn6p; stationary phase enriched; Hap43p-induced
orf19.2346	1.687	0.00435	0.773	0.00851	0	Putative protein of unknown function, transcription is positively regulated by Tbf1p
orf19.2347	1.062	0.78	0.946	0.771	MNN2	Alpha-1,2-mannosyltransferase; likely involved in iron utilization in the endocytosis pathway under iron-limiting conditions; similar to S. cerevisiae Mnn2p and Mnn5p; transposon mutation affects filamentous growth; filament induced
orf19.2348	1.414	no replicates	3.8	no replicates	#N/A	#N/A
orf19.2350	1.043	0.781	0.786	0.115	0	Protein similar to S. cerevisiae Yor378wp; transposon mutation affects filamentous growth; not essential for viability; member of MFS family of transporters; fungal-specific (no human or murine homolog)
orf19.2351	1.398	0.0138	0.82	0.000953	NIT3	Putative nitrilase; regulated by Gcn2p and Gcn4p; protein present in exponential and stationary growth phase yeast cultures
orf19.2352	1.043	0.672	0.931	0.246	0	S. cerevisiae ortholog Imo32p localizes to mitochondrion
orf19.2353	1.362	no replicates	0.921	no replicates	#N/A	#N/A
orf19.2355	1.065	no replicates	0.869	no replicates	#N/A	#N/A
orf19.2356	0.881	0.263	0.787	0.036	CRZ2	Putative zinc finger transcription factor; similar to S. cerevisiae Crz1p; homozygous crz1, not crz2, null mutation suppresses fluconazole resistance of homozygous cka2 null (defective in CK2 kinase ); Rim101p-downregulated at pH 8
orf19.2358	0.936	no replicates	0.771	no replicates	#N/A	#N/A
orf19.236	0.808	0.0776	1.064	0.0881	RPL9B	Ribosomal protein L9; downregulated upon phagocytosis by murine macrophages; repressed by nitric oxide; protein levels decrease in stationary phase; Hap43p-induced
orf19.2360	0.597	0.06	0.99	0.87	URA2	Putative bifunctional carbamoylphosphate synthetase-aspartate transcarbamylase; flucytosine induced; macrophage/pseudohyphal-induced; intron in 5'-UTR
orf19.2361	0.877	0.136	1.094	0.0643	SPT10	S. cerevisiae ortholog Spt10p has role in chromatin silencing at silent mating-type cassette, DNA repair, chromatin silencing at rDNA, chromatin silencing at telomere
orf19.2362	0.822	0.13	1.239	0.000253	0	Putative 90S preribosome component; Hap43p-induced gene; possibly an essential gene, disruptants not obtained by UAU1 method
orf19.2363	0.949	0.522	1.037	0.567	0	S. cerevisiae ortholog Rdl2p has thiosulfate sulfurtransferase activity and localizes to mitochondrion
orf19.2364	0.738	0.121	1.051	0.356	MIS11	Similar to precursor of mitochondrial C1-tetrahydrofolate synthase; putative protein of glycine catabolism; downregulated by Efg1p; fluconazole-induced; stationary phase enriched protein
orf19.2365	0.902	0.228	1.017	0.76	POL2	DNA polymerase epsilon; transcriptionally induced by interaction with macrophage; transcription is regulated by Tup1p; periodic mRNA expression, peak at cell-cycle G1/S phase
orf19.2366	0.786	0.797	0.436	no replicates	0	0
orf19.2367	1.556	0.00374	1.27	0.0217	0	Putative protein of unknown function; Hap43p-induced gene; transcription is negatively regulated by Rim101p
orf19.2368	0.942	0.521	1.013	0.836	0	S. cerevisiae ortholog Lin1p localizes to chromatin, U5 snRNP, U4/U6 x U5 tri-snRNP complex
orf19.2369	1.116	0.314	1.033	0.709	0	S. cerevisiae ortholog Orc5p has role in chromatin silencing at silent mating-type cassette, pre-replicative complex assembly, regulation of chromatin silencing at telomere, DNA-dependent DNA replication initiation
orf19.2369.1	2.389	0.00337	1.608	0.000163	ATX1	Putative cytosolic copper metallochaperone; flucytosine induced gene; expression downregulated in an ssr1 null mutant
orf19.2370	1.039	0.75	0.899	0.385	DSL1	Protein similar to S. cerevisiae Dsl1p, which is a member of the t-SNARE complex of the endoplasmic reticulum
orf19.2371	1.793	no replicates	1.78	no replicates	0	Putative Gag protein of retrotransposon Tca2; separated by a stop codon from Pol protein orf19.2372; both likely translated as single polyprotein that includes nucleocapsid-like protein (Gag), reverse transcriptase, protease, and integrase
orf19.2372	0.768	no replicates	1.388	no replicates	0	Putative Pol protein of retrotransposon Tca2; separated by a stop codon from Gag protein orf19.2371; both likely translated as single polyprotein that includes nucleocapsid-like protein (Gag), reverse transcriptase, protease, and integrase
orf19.2374	1.423	no replicates	1.458	no replicates	#N/A	#N/A
orf19.2375	NO DATA	NO DATA	NO DATA	NO DATA	#N/A	#N/A
orf19.2376	0.618	no replicates	0.984	no replicates	0	Ortholog of C. glabrata Cagl0k08932gp
orf19.2378	0.923	0.282	1.125	0.218	0	S. cerevisiae ortholog Pkr1p has role in vacuolar proton-transporting V-type ATPase complex assembly and localizes to integral to endoplasmic reticulum membrane
orf19.2379	1.103	0.322	0.878	0.101	NOT4	Putative E3 ubiquitin-protein ligase; required for maintenance, but not induction, of hyphal development; homozygous null mutant is avirulent in mouse systemic infection despite persistence in host; repressed in rat oral candidiasis
orf19.238	3.449	0.000998	1.47	1.04e-05	CCP1	Similar to cytochrome-c peroxidase N terminus; transcription is negatively regulated by Rim101p or alkaline pH; transcription induced by interaction with macrophage or low iron; oxygen-induced activity; Hap43p-repressed gene
orf19.2381	1.033	0.745	0.892	0.0444	0	Predicted ORF in Assemblies 19, 20 and 21; possibly an essential gene, disruptants not obtained by UAU1 method
orf19.2382	0.984	0.883	0.926	0.282	0	Protein similar to isoleucyl-tRNA synthetase; isoleucyl-tRNA synthetase is the target of drugs including the cyclic beta-amino acid icofungipen/PLD-118/BAY-10-8888 and mupirocin
orf19.2383	1.115	0.366	0.891	0.0636	YKU80	Yku70p-Yku80p Ku complex subunit involved in nonhomologous end joining during double-strand break repair repair; Hap43p-repressed gene; biofilm-induced
orf19.2384	0.817	0.281	1.162	0.00351	0	S. cerevisiae ortholog Mtg1p has role in mitochondrial translation and localizes to mitochondrial inner membrane
orf19.2385	0.823	0.0572	1.284	0.00413	KTI12	Protein similar to S. cerevisiae Kti12p, which associates with Elongator complex; has a role in resistance to killer toxin; predicted Kex2p substrate; Hap43p-induced gene
orf19.2386	0.776	0.0458	1.214	0.0299	0	Ortholog of S. cerevisiae Utp11p
orf19.2387	0.788	0.0427	1.018	0.779	0	Putative tRNA-Pro synthetase; genes encoding ribosomal subunits, translation factors, and tRNA synthetases are downregulated upon phagocytosis by murine macrophage
orf19.2389	0.948	0.705	1.015	0.807	0	0
orf19.239	0.84	0.0292	0.993	0.866	0	Putative ATP-dependent helicase; induced by nitric oxide
orf19.2391	0.935	0.408	0.933	0.318	0	Putative protein of unknown function; Hap43p-repressed gene; S. cerevisiae ortholog YKR023W localizes to mitochondria
orf19.2392	1.04	no replicates	0.93	no replicates	0	Protein not essential for viability
orf19.2393	0.872	0.146	1.078	0.437	0	Putative transcription factor with zinc finger DNA-binding motif
orf19.2394	1.029	0.606	0.999	0.99	0	S. cerevisiae ortholog Ynl134cp localizes to nucleus, cytoplasm
orf19.2395	1.939	0.201	5.231	no replicates	IME2	Putative serine/threonine protein kinase; mutation confers hypersensitivity to amphotericin B
orf19.2396	5.712	0.000106	3.128	2.11e-07	IFR2	Zinc-binding dehydrogenase; upregulated by benomyl, ciclopirox olamine or alpha pheromone; regulated by oxidative stress (via Cap1p) and osmotic stress (via Hog1p); protein present in exponential and stationary phase; Hap43p-induced gene
orf19.2397	0.439	0.261	0.423	2.14e-07	0	Predicted membrane transporter, member of the anion:cation symporter (ACS) family, major facilitator superfamily (MFS); amphotericin B, caspofungin repressed; Hap43p-repressed
orf19.2397.3	0.872	0.408	0.695	0.0416	0	Putative aminotransferase; Hap43p-repressed gene; homozygous transposon insertion causes decreased colony wrinkling under filamentous growth-inducing conditions, but does not block true hyphal formation in liquid media
orf19.2398	0.925	0.574	0.775	0.00281	0	Hap43p-repressed gene; possible increased transcription in an azole-resistant strain that overexpresses CDR1 and CDR2; possibly transcriptionally regulated by Tac1p; induced by Mnl1p under weak acid stress; biofilm-induced
orf19.2399	1.008	0.947	0.993	0.942	0	Putative transcription factor with zinc finger DNA-binding motif; similar to bacterial DnaJ; transcriptionally regulated by iron; expression greater in low iron
orf19.24	1.724	0.0145	0.862	0.0674	RTA2	Putative flippase required for sphingolipid long chain base release; mediates calcineurin-dependent resistance to azoles; stress-associated protein; Ca2+, calcineurin-regulated; ketoconazole, caspofungin induced; Plc1p-regulated
orf19.240	0.983	0.808	1.004	0.959	0	Membrane-localized protein
orf19.2400	0.908	0.311	0.925	0.125	0	S. cerevisiae ortholog Sqs1p has role in positive regulation of ATPase activity, nuclear mRNA splicing, via spliceosome, positive regulation of helicase activity, maturation of SSU-rRNA
orf19.2401	0.912	0.631	0.702	0.0147	0	Ortholog of S. cerevisiae Atg4p
orf19.2402	0.986	0.949	1.081	0.124	SSU72	Ortholog of S. cerevisiae Ssu72p
orf19.2404	0.826	0.0871	1.087	0.186	0	S. cerevisiae ortholog Pop1p has ribonuclease MRP activity, ribonuclease P activity, has role in intronic box C/D snoRNA processing, mRNA cleavage, rRNA processing, tRNA processing and localizes to nucleolar ribonuclease P complex
orf19.2406	0.924	0.212	0.983	0.737	0	S. cerevisiae ortholog Gtr2p has role in microautophagy, positive regulation of transcription from RNA polymerase II promoter
orf19.2407	0.926	0.288	0.959	0.576	DPS1-1	Putative tRNA-Asp synthetase; genes encoding ribosomal subunits, translation factors, tRNA synthetases are downregulated upon phagocytosis by murine macrophage; protein enriched in stationary phase yeast cultures
orf19.2408	1.031	0.725	1.149	0.00523	0	S. cerevisiae ortholog Tyw3p has tRNA methyltransferase activity and has role in tRNA methylation, wybutosine biosynthetic process
orf19.241	0.83	no replicates	1.216	no replicates	#N/A	#N/A
orf19.2410	0.947	0.608	0.952	0.464	SYS3	Protein similar to S. cerevisiae Sys3p; putative role in endosome-Golgi vesicle docking; upregulated in biofilm; induced upon adherence to polystyrene
orf19.2411	1.027	0.734	0.756	0.00768	0	S. cerevisiae ortholog Syn8p has SNAP receptor activity, has role in transport and localizes to endosome
orf19.2412	1.048	0.478	0.845	0.0754	0	S. cerevisiae ortholog Vps55p has role in late endosome to vacuole transport via multivesicular body sorting pathway and localizes to late endosome, Vps55/Vps68 complex
orf19.2413	0.943	no replicates	0.945	no replicates	#N/A	#N/A
orf19.2414	1.139	0.114	0.841	0.00822	0	Hap43p-repressed gene
orf19.2415	1.031	0.77	1.003	0.953	0	S. cerevisiae ortholog Mse1p has role in mitochondrial translation and localizes to mitochondrion
orf19.2416.1	0.832	0.31	1.103	0.408	MLC1	Protein with microtubule-dependent localization to the Spitzenkorper, also localizes to cytokinetic ring in hyphae; cell-cycle dependent localization to bud tip (polarisome) and bud neck in yeast and pseudohyphal cells; sumoylation target
orf19.2417	1.089	0.364	1.072	0.42	SMC5	Protein similar to S. cerevisiae Smc5p, which is involved in DNA repair; transposon mutation affects filamentous growth
orf19.2418	0.901	0.204	1.15	0.0524	0	0
orf19.2419	0.942	0.494	0.983	0.76	0	Hap43p-repressed gene; ortholog of S. cerevisiae DOM34, an RNA-binding protein required for meiotic cell division
orf19.242	0.874	0.478	0.896	0.15	SAP8	Secreted aspartyl protease; regulated by growth phase, temperature, white-opaque switch; highly expressed in opaque cells; expressed upon deep epidermal invasion; greater expression in vaginal infection than oral infection; N-glycosylated
orf19.242.2	0.96	0.712	0.795	0.00759	0	S. cerevisiae ortholog Ysy6p localizes to endoplasmic reticulum
orf19.2422	0.958	0.556	0.966	0.238	ARC1	Putative G4 nucleic acid binding protein; macrophage/pseudohyphal-repressed; protein enriched in stationary phase yeast-form cultures
orf19.2423	0.884	0.144	0.995	0.913	ZCF11	Putative DNA-binding transcription factor with a zinc cluster domain, required for wild-type filamentous growth; mRNA binds to She3p
orf19.2425	1.48	0.00455	0.952	0.712	HGT18	Putative glucose transporter of the major facilitator superfamily; the C. albicans glucose transporter family comprises 20 members; 12 probable membrane-spanning segments; expressed in rich medium with 2% glucose
orf19.2425.2	0.859	no replicates	1.004	no replicates	#N/A	#N/A
orf19.2426	1.076	0.264	1.199	0.0123	0	S. cerevisiae ortholog Ygl101wp localizes to nucleus, cytoplasm
orf19.2427	0.769	no replicates	1.1	no replicates	#N/A	#N/A
orf19.2428.2	0.607	no replicates	0.695	no replicates	#N/A	#N/A
orf19.2429	0.97	0.894	1.44	0.186	0	Predicted ORF in Assemblies 19, 20 and 21; transcription is induced in response to alpha pheromone in SpiderM medium
orf19.243	0.987	0.847	0.996	0.969	OXR1	S. cerevisiae ortholog Oxr1p has role in cellular response to oxidative stress and localizes to mitochondrion
orf19.2430	0.455	0.391	2.623	no replicates	0	0
orf19.2431	0.979	0.859	0.633	0.00247	0	Dubious open reading frame, not conserved in Candida species; transcription is induced in response to alpha pheromone in SpiderM medium; mRNA binds She3p
orf19.2432	0.93	0.404	0.672	0.000683	HAC1	Putative bZIP transcription factor involved in unfolded protein response and control of morphology; transcript undergoes atypical splicing at C terminus under ER stress; induced during mating and by caspofungin; mRNA binds She3p
orf19.2433	1.001	0.995	0.85	0.0517	0	0
orf19.2434	1.02	0.836	0.772	0.00295	NPL4	Putative ubiquitin-binding protein; regulated by Gcn2p and Gcn4p
orf19.2435	1.024	0.74	0.922	0.117	MSI3	Antigenic HSP70 family protein; functional homolog of S. cerevisiae Msi3p; interacts by 2-hybrid with Cgr1p; transcriptionally regulated by iron; expression greater in high iron; farnesol downregulated in biofilm; sumoylation target
orf19.2436	0.916	0.36	1.094	0.234	0	Ortholog of C. glabrata Cagl0f03905gp
orf19.2437	1.148	0.284	1.004	0.943	ARC35	Putative ARP2/3 complex subunit; shows colony morphology-related gene regulation by Ssn6p; mutation confers hypersensitivity to cytochalasin D
orf19.2438	0.838	0.0484	1.057	0.128	0	S. cerevisiae ortholog Mrps12p localizes to ribosome, mitochondrion
orf19.2439	1.029	0.766	0.909	0.209	0	Predicted ORF in Assemblies 19, 20 and 21; shows colony morphology-related gene regulation by Ssn6p
orf19.2439.1	1.002	0.986	1.023	0.75	0	S. cerevisiae ortholog Qcr10p has ubiquinol-cytochrome-c reductase activity, has role in aerobic respiration, mitochondrial electron transport, ubiquinol to cytochrome c and localizes to mitochondrial respiratory chain complex III
orf19.244	1.303	0.0881	1.021	0.785	DCG1	Protein similar to S. cerevisiae Dcg1p; transcription is regulated by Nrg1p and Mig1p
orf19.2440	0.849	0.245	1.058	0.709	0	Predicted ORF in Assemblies 19, 20 and 21; transcription is induced in response to alpha pheromone in SpiderM medium
orf19.2441	0.681	no replicates	2.28	no replicates	#N/A	#N/A
orf19.2442	0.967	0.767	1.124	0.0606	0	Decreased transcription is observed in an azole-resistant strain that overexpresses MDR1
orf19.2443	1.203	0.342	1.027	0.649	RGD1	GTPase activator protein; transcriptionally regulated by iron; expression greater in low iron; alkaline upregulated; localized to the bud emergence area in G1 phase and in the bud tip during S and G2 phases
orf19.2444	1.06	0.652	1.075	0.281	CHS7	Protein required for wild-type chitin synthase III activity; similar to (but not functional homolog of) S. cerevisiae Chs7p, which effects ER export of Chs3p; induced in homozygous cyr1 null mutant hyphae and ras1 yeast-form cells
orf19.2445	1.909	no replicates	1.2	no replicates	0	Putative dicarboxylic amino acid permease; fungal-specific (no human or murine homolog); transcription is induced in response to alpha pheromone in SpiderM medium
orf19.2446	1.243	0.0378	0.715	0.00125	0	S. cerevisiae ortholog Ydl144cp localizes to nucleus, cytoplasm
orf19.2447	1.016	0.775	0.884	0.0629	0	Putative Type II phosphatidylinositol 4-kinase; expression downregulated in an ssr1 null mutant
orf19.2449	1.275	0.0395	0.943	0.895	0	Putative adhesin-like protein; macrophage-induced gene
orf19.245	1.311	0.0582	0.861	0.0187	DDC1	Putative DNA damage checkpoint protein; transcription is induced during filamentous growth; regulated by Nrg1p, Tup1p
orf19.2451	0.774	0.117	0.778	0.0352	PGA45	Cell wall protein; putative GPI-anchor; downregulated in core caspofungin response; Hog1p-induced; regulated by Ssn6p; Mob2p-dependent hyphal regulation; biofilm-induced
orf19.2452	0.677	0.101	0.824	0.021	0	Transcriptionally regulated by iron; expression greater in high iron; downregulated in core caspofungin response; ketoconazole-repressed; shows colony morphology-related gene regulation by Ssn6p; possibly subject to Kex2p processing
orf19.2454	0.814	0.0782	0.872	0.164	PHO87	Putative phosphate permease; transcription negatively regulated by Rim101p at pH 8; expression regulated upon white-opaque switching; caspofungin repressed; biofilm-regulated; biofilm-induced; virulence-group-correlated expression
orf19.2455	1.027	0.773	0.87	0.0116	0	S. cerevisiae ortholog Dug2p has omega peptidase activity, has role in glutathione catabolic process and localizes to nucleus, cytoplasm
orf19.2456	0.9	no replicates	0.959	no replicates	#N/A	#N/A
orf19.2457	1.102	0.586	1.321	0.188	0	0
orf19.2458	1.299	0.033	0.979	0.593	0	Putative transcription factor with zinc finger DNA-binding motif; late-stage biofilm-induced
orf19.2459	0.949	0.617	0.925	0.2	0	Protein of unknown function; mRNA binds to She3p; Hap43p-repressed gene
orf19.246	1.934	0.164	0.384	0.255	0	S. cerevisiae ortholog Yil108wp localizes to cytoplasm
orf19.2460	1.705	0.197	0.829	0.434	0	Predicted ORF in Assemblies 19, 20 and 21; exogenously expressed protein is a substrate for Kex2p processing in vitro; transcription is repressed in response to alpha pheromone in SpiderM medium
orf19.2461	2.8	0.00461	2.263	5.67e-06	PRN4	Protein with similarity to pirins; increased transcription is observed upon benomyl treatment
orf19.2462	1.555	0.0249	1.972	4.43e-05	PRN3	Protein similar to pirin; transcriptionally activated by Mnl1p under weak acid stress; Hap43p-repressed gene
orf19.2463	1.993	0.00657	1.851	0.000193	PRN2	Protein similar to pirin; Hap43p-repressed gene
orf19.2465	1.064	0.508	1.099	0.152	POL32	Predicted ORF in Assemblies 19, 20 and 21; cell-cycle regulated periodic mRNA expression
orf19.2467	1.042	0.779	1.133	0.0289	PRN1	Protein with similarity to pirins; increased transcription is observed upon benomyl treatment and in response to alpha pheromone in SpiderM medium; transcriptionally activated by Mnl1p under weak acid stress
orf19.2468	0.723	0.34	0.942	0.72	0	S. cerevisiae ortholog Tmt1p has trans-aconitate 3-methyltransferase activity and localizes to cytosol
orf19.2469	0.939	0.526	0.863	0.082	RAD10	Ortholog of S. cerevisiae RAD10, an endonuclease involved in nucleotide excision repair; null mutant is extremely sensitive to UV irradiation; transcription is downregulated in alkaline conditions
orf19.247	0.87	0.0479	0.949	0.204	0	0
orf19.2471	1.015	0.892	1.086	0.249	GIM5	Putative heterohexameric cochaperone prefoldin complex subunit; macrophage/pseudohyphal-repressed gene and macrophage-induced protein
orf19.2472	0.929	0.604	1.281	0.0093	0	0
orf19.2472.1	NO DATA	NO DATA	NO DATA	NO DATA	0	0
orf19.2473	0.843	0.225	1.024	0.717	0	Putative RSC chromatin remodeling complex component; decreased transcription is observed upon fluphenazine treatment or in an azole-resistant strain that overexpresses CDR1 and CDR2
orf19.2474	1.482	0.163	1.07	0.25	PRC3	Putative carboxypeptidase Y precursor; transcription is regulated by Nrg1p and Mig1p; regulated by Gcn2p and Gcn4p
orf19.2475	0.505	0.23	0.443	0.00191	PGA26	GPI-anchored adhesin-like protein of the cell wall, role in cell wall integrity; required for normal virulence; transcriptionally regulated by iron; expression greater in high iron; induced during cell wall regeneration; Hap43p-repressed
orf19.2476	0.928	0.582	0.927	0.127	0	S. cerevisiae ortholog Ecm5p has role in fungal-type cell wall organization and localizes to Snt2C complex
orf19.2478	1.154	0.354	0.886	0.243	0	0
orf19.2478.1	0.856	0.193	0.91	0.149	0	60S ribosomal protein L7; snoRNA snR39b encoded within the 2nd intron
orf19.2479	1.1	0.623	0.62	0.115	UGA4	Putative gamma-aminobutyric acid/polyamine permease; nitrogen catabolite repressed gene, induced in absence of preferred N sources; transcriptionally induced upon phagocytosis by macrophage; gene regulation by nitrogen source requires Gat1p
orf19.248	1.034	0.72	0.962	0.541	APL5	Phosphorylated protein, not essential for viability; similar to S. cerevisiae Apl5p, which is a subunit of the AP-3 adaptor complex involved in Golgi-to-vacuole transport
orf19.2480.1	1.628	0.00521	0.719	0.00243	AUT7	Putative autophagosome protein; macrophage/pseudohyphal-repressed; alternatively spliced intron in 5' UTR
orf19.2481	2.249	0.00517	1.229	0.00714	0	0
orf19.2483	0.923	0.141	0.978	0.616	RIM1	Putative single-stranded DNA-binding protein; protein level decreases in stationary phase cultures
orf19.2484	1.157	0.192	0.896	0.0774	0	Ortholog of S. cerevisiae Ydr415cp
orf19.2485	0.904	0.375	0.945	0.233	0	S. cerevisiae ortholog Nup170p has role in protein targeting to membrane, chromosome segregation, nuclear pore complex assembly and localizes to nuclear pore
orf19.2487	0.905	0.262	1.232	0.00256	0	S. cerevisiae ortholog Das2p localizes to nucleus, cytoplasm
orf19.2488	0.801	0.0608	1.223	0.0194	FAL1	S. cerevisiae ortholog Fal1p has role in maturation of SSU-rRNA from tricistronic rRNA transcript (SSU-rRNA, 5.8S rRNA, LSU-rRNA) and localizes to nucleolus
orf19.2489	0.684	0.0212	1.067	0.38	0	Putative karyopherin beta; repressed by nitric oxide
orf19.2492	NO DATA	NO DATA	1.68	no replicates	STE3	Protein similar to S. cerevisiae Ste3p, the receptor for a-factor mating pheromone; alpha mating-type-specific transcription
orf19.2494	0.957	0.499	0.955	0.602	0	S. cerevisiae ortholog Pet112p has glutaminyl-tRNA synthase (glutamine-hydrolyzing) activity and has role in mitochondrial translation, glutaminyl-tRNAGln biosynthesis via transamidation
orf19.2495	0.918	0.272	1.026	0.837	GSL1	Beta-1,3-glucan synthase subunit; 10 predicted transmembrane regions; caspofungin induced; repressed upon yeast-to-hyphal transition; similar to S. cerevisiae Fks3p; fungal-specific; young biofilm repressed, induced by biofilm drug exposure
orf19.2496	0.913	0.3	0.786	0.0767	ATO2	Putative fungal-specific transmembrane protein; Hap43p-repressed gene; fluconazole-downregulated; late-stage biofilm-induced gene
orf19.2498	1.421	0.0167	0.924	0.236	0	Hap43p-repressed gene; oxidative stress-induced via Cap1p; late-stage biofilm-induced and planktonic growth-induced gene
orf19.2499	0.873	0.222	1.021	0.723	0	Putative peptidyl-prolyl cis-trans isomerase
orf19.25	0.863	0.118	1.071	0.245	0	S. cerevisiae ortholog Trm10p has tRNA (guanine) methyltransferase activity, has role in tRNA methylation and localizes to nucleus, cytoplasm
orf19.250	0.741	0.0186	0.931	0.196	SLC1	Putative fatty acyltransferase; protein repressed during the mating process
orf19.2500	2.998	0.00226	1.625	0.000308	0	0
orf19.2501	0.916	0.27	0.828	0.0185	FLC1	Protein involved in heme uptake; putative FAD transporter, similar to S. cerevisiae Flc1p; regulated by iron; macrophage-induced gene; mutant shows defect in filamentous growth
orf19.2503	0.807	0.638	1.092	no replicates	0	0
orf19.2504	0.753	0.0196	1.197	0.0504	BMS1	Putative GTPase; Hap43p-induced gene; mutation confers resistance to 5-fluorocytosine (5-FC); flucytosine induced; decreased expression in response to prostaglandins
orf19.2505	1.5	0.579	1.527	no replicates	0	0
orf19.2506	1.108	0.332	1.044	0.697	0	Predicted ORF in Assemblies 19, 20 and 21; opaque-specific transcription; Hog1p-downregulated
orf19.2507	0.903	0.151	0.895	0.0524	ARP9	Protein similar to S. cerevisiae Arp3p, a component of the Arp2/3 complex involved in actin-dependent processes; likely to be essential for growth, based on an insertional mutagenesis strategy
orf19.2508	0.86	0.13	0.923	0.227	PRM9	Protein not essential for viability; similar to S. cerevisiae Prm9p, which may bind to COPII coated vesicles
orf19.2509	NO DATA	NO DATA	NO DATA	NO DATA	0	0
orf19.2509.1	NO DATA	NO DATA	NO DATA	NO DATA	0	0
orf19.251	16.43	4.27e-08	2.994	9.48e-06	0	ThiJ/PfpI protein; binds human immunoglobulin E; 2 N-glycosylation motifs; alkaline, fluconazole, Hog1p-downregulated; induced in core stress response or by oxidative stress (via Cap1p); induced by hypoxia, Hap43p; stationary-phase enriched
orf19.2510	0.896	0.489	1.028	0.851	0	S. cerevisiae ortholog Cin1p has role in protein folding
orf19.2511	0.74	no replicates	0.375	no replicates	#N/A	#N/A
orf19.2511.1	0.952	0.605	1.151	0.0166	MRPL33	Putative mitochondrial ribosomal protein of the large subunit; expression upregulated in an ssr1 null mutant; transcription is upregulated in both intermediate and mature biofilms
orf19.2511.2	NO DATA	NO DATA	NO DATA	NO DATA	0	0
orf19.2512	0.988	0.805	0.993	0.953	0	0
orf19.2513	0.867	0.0404	1.144	0.0824	0	0
orf19.2514	1.013	0.884	1.05	0.565	0	0
orf19.2515	1.471	0.141	1.218	0.161	0	0
orf19.2516	1.135	0.234	1.058	0.372	0	0
orf19.2517	0.915	0.645	0.861	0.462	0	Predicted membrane transporter, member of the drug:proton antiporter (12 spanner) (DHA1) family, major facilitator superfamily (MFS)
orf19.2518	1.158	0.0932	1.03	0.663	0	S. cerevisiae ortholog Sec17p has ATPase activator activity, soluble NSF attachment protein activity and has role in vesicle fusion with Golgi apparatus, SNARE complex disassembly, autophagy, vacuole fusion, non-autophagic
orf19.2519	0.977	0.684	1.113	0.136	0	S. cerevisiae ortholog Nnf1p has role in chromosome segregation and localizes to spindle pole, nuclear MIS12/MIND type complex
orf19.252	0.934	0.412	1.193	0.00277	0	Putative protein of unknown function; Hap43p-repressed gene; S. cerevisiae ortholog FMP37 localizes to mitochondria
orf19.2520	0.969	0.655	1.053	0.424	0	S. cerevisiae ortholog Mrps28p has structural constituent of ribosome and localizes to mitochondrial small ribosomal subunit
orf19.2521	0.855	0.182	1.147	0.0291	0	0
orf19.2522	0.843	no replicates	1.215	no replicates	#N/A	#N/A
orf19.2524	0.963	0.722	1.008	0.85	MGE1	Putative mitochondrial matrix cochaperone; macrophage/pseudohyphal-repressed
orf19.2525	1.077	0.526	1.059	0.347	LYS12	Putative mitochondrial homoisocitrate dehydrogenase; clade-associated gene expression; protein level decreases in stationary phase cultures
orf19.2527	0.727	0.103	1.212	0.0024	0	Putative protein of unknown function; Hap43p-induced; required for normal biofilm growth; induced upon biofilm formation
orf19.2528	0.894	0.314	1.17	0.0473	0	Putative RNA polymerase III transcription factor (TFIIIB) subunit; flucytosine repressed
orf19.2529	0.844	0.507	1.047	0.52	0	Predicted ORF in Assemblies 19, 20 and 21; shares similarity with human Pig-H, which is involved in glycosylphosphatidylinositol assembly
orf19.2529.1	NO DATA	NO DATA	NO DATA	NO DATA	0	0
orf19.253	0.868	no replicates	1.016	no replicates	#N/A	#N/A
orf19.2530	2.073	0.126	2.463	0.232	0	0
orf19.2531	2.46	0.0338	1.153	0.471	CSP37	Plasma membrane, hyphal cell wall protein; role in progression of murine systemic infection; predicted P-loop, divalent cation binding, N-glycosylation sites; expressed in yeast and hyphae; hyphal downregulated; stationary-phase enriched
orf19.2532	0.949	0.457	1.032	0.61	PRS	Putative prolyl-tRNA synthetase; monofunctional Class II synthetase; gene is constitutively expressed
orf19.2533	0.907	no replicates	1.145	no replicates	#N/A	#N/A
orf19.2533.1	0.962	0.7	1.012	0.843	0	Protein with a predicted role in protein translocation from the endoplasmic reticulum
orf19.2534	1.091	0.69	0.872	0.00653	PIN4	Protein with similarity to S. cerevisiae Pin4p; transposon mutation affects filamentous growth
orf19.2537	0.782	0.19	0.83	0.0894	0	Predicted ORF in Assemblies 19, 20 and 21; transcription detected in high-resolution tiling array experiments
orf19.2538	0.859	0.195	1.008	0.906	PTC2	Protein phosphatase of the Type 2C-related family (serine/threonine-specific) with a potential role in DNA damage checkpoint control; localizes to both cytoplasm and mitochondria; mutant shows virulence defect
orf19.2539	0.784	no replicates	0.925	0.724	0	Predicted ORF in Assemblies 19, 20 and 21; transcription detected in high-resolution tiling array experiments
orf19.254	0.998	0.995	1.285	0.0622	0	Predicted ORF in Assemblies 19, 20 and 21; Hog1p-downregulated
orf19.2540	1.007	0.907	1	0.995	SAS3	Similar to silencing proteins; increased transcription is observed upon fluphenazine treatment
orf19.2541	0.962	0.664	1.179	0.0217	0	S. cerevisiae ortholog Ybl055cp has 3'-5'-exodeoxyribonuclease activity, endonuclease activity, has role in cellular response to oxidative stress, DNA fragmentation involved in apoptotic nuclear change and localizes to cytoplasm
orf19.2542	0.993	0.882	1.083	0.122	0	0
orf19.2544	1.096	0.429	0.997	0.976	0	S. cerevisiae ortholog Pth2p has aminoacyl-tRNA hydrolase activity, has role in negative regulation of proteasomal ubiquitin-dependent protein catabolic process and localizes to mitochondrial outer membrane
orf19.2545	0.904	0.227	0.991	0.874	DOT6	Putative protein with a predicted role in telomeric gene silencing and filamentation; repressed upon high-level peroxide stress
orf19.2546	0.957	0.703	0.938	0.498	TRP2	Putative anthranilate synthase with a predicted role in tryptophan biosynthesis; regulated by Gcn2p and Gcn4p
orf19.2547	0.867	0.224	1.13	0.0823	0	0
orf19.2549	1.113	0.463	0.75	0.00806	0	S. cerevisiae ortholog Shp1p has role in glycogen metabolic process, ascospore formation, ER-associated protein catabolic process, autophagic vacuole assembly, sister chromatid biorientation, piecemeal microautophagy of nucleus
orf19.255	0.757	0.0145	1.32	0.00864	ZCF1	Predicted zinc-cluster protein; possibly transcriptionally regulated upon hyphal formation; late-stage biofilm-induced; intron in 5'-UTR; possibly an essential gene, disruptants not obtained by UAU1 method
orf19.2550	1.031	no replicates	0.814	no replicates	#N/A	#N/A
orf19.2551	0.787	0.06	0.865	0.00495	MET6	Essential 5-methyltetrahydropteroyltriglutamate-homocysteine methyltransferase (cobalamin-independent methionine synthase); antigenic during murine or human systemic infection; heat shock, estrogen, possibly biofilm, and GCN-induced
orf19.2552	1.219	0.728	0.925	0.901	0	Protein similar to S. cerevisiae Pmr1p; amphotericin B induced; previously merged with orf19.2553; unmerged from orf19.2553 in a revision of Assembly 21
orf19.2553	0.789	0.557	1.913	0.0494	0	Protein similar to S. cerevisiae Pmr1p; amphotericin B induced; previously merged with orf19.2552 in Assembly 20; unmerged from orf19.2552 in a revision of Assembly 21
orf19.2555	1.119	0.54	1.295	0.00325	URA5	Putative orotate phosphoribosyltransferase; protein abundance is affected by URA3 expression in the CAI-4 strain background; flucytosine induced; protein level decreased in stationary phase cultures
orf19.2557	1.104	0.254	0.899	0.113	SEC65	Functional homolog of S. cerevisiae Sec65p, which is a component of the protein-targeting Signal Recognition Particle (SRP); similar to mammalian Srp19; transcription is positively regulated by Tbf1p
orf19.2558	0.968	0.535	0.948	0.426	0	0
orf19.2559	0.886	0.16	0.89	0.123	CDC4	F-box subunit of SCF(CDC4) ubiquitin ligase; functional homolog of S. cerevisiae Cdc4p; mutation or depletion causes hyperfilamentation; nonessential; Sol1p is a substrate of SCF-Cdc4p
orf19.2560	0.983	0.877	0.889	0.271	CDC60	Cytosolic leucyl tRNA synthetase; conserved amino acid and ATP binding class I signature, tRNA binding, proofreading motifs; likely essential for growth; interacts with benzoxaborole antifungals; present in exponential and stationary phase
orf19.2562	0.663	no replicates	0.753	no replicates	#N/A	#N/A
orf19.2563	0.833	0.0695	1.138	0.159	0	0
orf19.2564	0.736	0.0216	1.173	0.0501	0	0
orf19.2565	1.03	0.827	0.844	0.0676	0	S. cerevisiae ortholog Mdm1p has phosphatidylinositol-3-phosphate binding and has role in mitochondrion inheritance
orf19.2568	1.865	0.0393	0.833	0.0548	IFU5	Predicted membrane protein; estradiol-induced; increased transcription associated with CDR1 and CDR2 overexpression or fluphenazine treatment; putative drug-responsive regulatory site; similar to S. cerevisiae Wwm1p; Hap43p-repressed gene
orf19.257	1.08	0.64	0.862	0.478	0	Transcription is negatively regulated by Sfu1p; repressed by nitric oxide
orf19.2570	0.938	0.497	1.092	0.188	MCI4	Putative NADH-ubiquinone dehydrogenase; Hap43p-repressed gene
orf19.2571	0.989	0.885	0.993	0.897	SEC4	Small GTPase of Rab family; role in post-Golgi secretion; possible C-terminal palmitoylation; downregulated on adherence to polystyrene; localizes to the Spitzenkorper during hyphal growth; functional homolog of S. cerevisiae Sec4p
orf19.2573	0.913	0.371	0.996	0.931	FRS1	Phenylalanyl-tRNA synthetase; possible role in early cell wall biosynthesis; downregulated by phagocytosis by macrophages; possibly essential gene, disruptants not obtained by UAU1 method; protein present in exponential and stationary phase
orf19.2574	0.99	0.88	0.969	0.729	0	Ortholog of S. cerevisiae Yfl034wp
orf19.2575	0.787	0.0258	1.213	0.0622	0	Putative S-adenosylmethionine-dependent methyltransferase; Hap43p-induced gene
orf19.2579	0.994	0.968	0.981	0.82	0	S. cerevisiae ortholog Msh4p has DNA binding, has role in reciprocal meiotic recombination and localizes to nuclear chromosome
orf19.258	1.603	0.158	1.262	0.101	0	0
orf19.2580	1.04	0.584	0.876	0.157	HST2	Putative histone deacetylase, involved in regulation of white-opaque switching
orf19.2581	1.065	0.628	0.664	0.246	0	Hap43p-repressed gene
orf19.2582	0.98	0.868	0.954	0.435	0	S. cerevisiae ortholog Tae2p has role in translation and localizes to ribosome, cytoplasm
orf19.2583	0.525	0.669	1.45	0.431	0	Putative oligopeptide transporter
orf19.2583.1	0.748	no replicates	0.878	no replicates	0	Pseudogene; formerly an ORF Predicted by Annotation Working Group
orf19.2583.2	NO DATA	NO DATA	1.419	no replicates	0	Pseudogene; formerly an ORF Predicted by Annotation Working Group
orf19.2584	0.648	no replicates	1.089	no replicates	OPT9	Probable pseudogene similar to fragments of OPT1 oligopeptide transporter gene; decreased expression in hyphae compared to yeast-form cells; transcriptionally induced upon phagocytosis by macrophage
orf19.2585	0.399	no replicates	NO DATA	NO DATA	0	0
orf19.2587	0.944	0.842	0.786	0.442	HNM3	Putative transporter; Hap43p-repressed gene; flucytosine repressed; possibly an essential gene, disruptants not obtained by UAU1 method
orf19.259	0.795	0.0708	1.068	0.364	0	Late-stage biofilm-induced gene
orf19.2590	1.172	0.166	1.077	0.535	0	Putative dethiobiotin synthetase; transcription is upregulated in clinical isolates from HIV+ patients with oral candidiasis; Hap43p-repressed gene
orf19.2591	0.646	0.102	0.686	0.235	0	S. cerevisiae ortholog Bio3p has adenosylmethionine-8-amino-7-oxononanoate transaminase activity and has role in biotin biosynthetic process
orf19.2593	1.008	0.946	0.512	9.92e-06	BIO2	Putative biotin synthase; transcriptionally upregulated in high iron; transcription downregulated by treatment with ciclopirox olamine; upregulated in clinical isolates from HIV+ patients with oral candidiasis; Hap43p-repressed
orf19.2594	0.796	0.0243	1.184	0.00721	0	S. cerevisiae ortholog Rpa43p has DNA-directed RNA polymerase activity, has role in transcription of nuclear large rRNA transcript from RNA polymerase I promoter and localizes to DNA-directed RNA polymerase I complex
orf19.2595	0.784	no replicates	1.126	no replicates	#N/A	#N/A
orf19.2597	0.905	0.413	1.217	0.114	MRS2	Putative magnesium ion transporter, mitochondrial; fungal-specific (no human or murine homolog)
orf19.2598	1.029	0.735	0.953	0.314	VMA4	H+ transporting ATPase E chain; transcription is regulated by Mig1p; caspofungin repressed; protein level decreases in stationary phase cultures
orf19.2599	0.853	0.248	0.638	0.000439	CRC1	Mitochondrial carnitine carrier protein
orf19.26	1.249	0.212	1.028	0.614	0	Putative peptide N-glycanase; induced by nitric oxide independent of Yhb1p
orf19.260	1.036	0.619	1.153	0.0952	SLD1	Sphingolipid delta-8 desaturase, catalyzes desaturation at carbon-8 in the long-chain base moiety of ceramides during glucosylceramide synthesis, which is important for virulence; ketoconazole and hypoxia induced; Hap43p-repressed
orf19.2600	0.914	0.296	1.033	0.738	SPC98	Putative component of the microtubule-nucleating Tub4p (gamma-tubulin) complex; periodic mRNA expression, peak at cell-cycle S/G2 phase
orf19.2601	1.091	0.431	0.808	0.0134	HEM1	Putative 5-aminolevulinate synthase; transcriptionally regulated by iron; caspofungin repressed; expression greater in high iron; regulated by Ssn6p; induced by nitric oxide; Hap43p-repressed
orf19.2602	1.308	0.602	0.823	0.54	OPT1	Oligopeptide transporter; transports 3-to-5-residue peptides; alleles are distinct, one has intron; suppresses S. cerevisiae ptr2-2 mutant defects; induced by BSA or peptides; Stp3p, Hog1p regulated; biofilm-regulated via Tye7p
orf19.2604	0.78	0.0262	1.155	0.127	0	S. cerevisiae ortholog Ynl022cp localizes to nucleus
orf19.2605	0.958	0.715	0.998	0.975	0	Putative protein serine/threonine kinase; mutants sensitive to growth on hydrogen peroxide medium
orf19.2606	0.866	0.165	1.001	0.987	HDA1	Histone deacetylase; conserved deacetylation motif; regulates white-to-opaque switching frequency but not opaque-to-white switching; greater expression in white cells than opaque cells; inhibited by trichostatin-A; inducer of filamentation
orf19.2607	1.226	0.386	0.918	0.278	0	0
orf19.2608	0.956	0.659	1.012	0.94	ADH5	Putative alcohol dehydrogenase; regulated by white-opaque switching; fluconazole-induced; antigenic in murine infection; regulated by Nrg1p, Tup1p; Hap43p-repressed, macrophage-downregulated protein; biofilm- and planktonic growth-induced
orf19.2609	0.871	0.203	0.898	0.193	CET1	mRNA 5'-triphosphatase; large subunit of mRNA capping enzyme; positively regulates Ceg1p activity; functional homolog of S. cerevisiae Cet1p; Cet1p and Cgt1p form a 2:1 complex; late-stage biofilm-induced gene
orf19.261	0.961	0.745	0.865	0.0551	0	0
orf19.2610	1.153	0.538	1.115	0.227	0	Intron-containing gene
orf19.2611	1.003	0.931	1.084	0.38	MCM6	Putative MCM DNA replication initiation complex component; mRNA expression, peak at cell-cycle M/G1 phase; regulated by tyrosol and cell density; repressed in response to alpha pheromone in SpiderM medium; Hap43p-induced gene
orf19.2612	0.926	0.471	1.237	0.0377	0	Putative zinc finger DNA-binding transcription factor; expression downregulated in an ssr1 null mutant; late-stage biofilm-induced gene
orf19.2613	1.255	0.171	1.16	0.0337	ECM4	Cytoplasmic glutathione S-transferase; transcription regulated by Nrg1p, Tup1p; induced in core stress response, in cyr1 or ras1 null mutant (yeast or hyphal cells); transposon mutation affects filamentous growth; stationary phase enriched
orf19.2614	1.025	0.789	0.954	0.33	RSR1	RAS-related protein; GTP/GDP cycling required for wild-type polar bud site selection, hyphal growth guidance; role in systemic virulence in mouse; geranylgeranylation predicted; suppresses S. cerevisiae cdc24-4 mutant heat sensitivity
orf19.2615	1.089	0.347	0.877	0.127	MDL1	Putative mitochondrial, half-size MDR-subfamily ABC transporter
orf19.2616	1.006	0.959	0.881	0.0587	UGT51C1	UDP-glucose:sterol glucosyltransferase; enzyme of sterol glucoside (membrane-bound lipid) biosynthesis; has UDP-sugar binding domain; activity is UDP-glucose-specific in vitro; enzyme does not use UDP-mannose; Mig1p-regulated gene
orf19.2618	0.929	0.531	0.984	0.795	MET2	Homoserine acetyltransferase; Hap43p-, Gcn4p-regulated; macrophage/pseudohyphal-repressed; not highly biofilm induced, in contrast to many sulfur amino acid metabolic genes; no human or murine homolog; virulence-group-correlated expression
orf19.2619	0.778	no replicates	0.681	no replicates	PHO113	Putative constitutive acid phosphatase; transcription is negatively regulated by Rim101p; DTT-extractable; N-glycosylated; possibly an essential gene, disruptants not obtained by UAU1 method
orf19.262	1.032	0.808	0.873	0.0294	SMC3	Protein similar to S. cerevisiae Smc3p, which is an ATPase involved in sister chromatid cohesion; likely to be essential for growth, based on an insertional mutagenesis strategy
orf19.2620	0.461	no replicates	NO DATA	NO DATA	0	0
orf19.2621	0.914	0.397	1.324	0.00207	0	S. cerevisiae ortholog Smb1p has role in nuclear mRNA splicing, via spliceosome and localizes to U1 snRNP, U2-type prespliceosome, U5 snRNP, U4/U6 x U5 tri-snRNP complex
orf19.2622	0.923	0.427	0.874	0.035	YPT31	Protein required for resistance to toxic ergosterol analog
orf19.2623	0.91	0.571	1.021	0.853	ECM22	Putative transcription factor with zinc cluster DNA-binding motif
orf19.2624	2.991	0.0381	2.285	0.118	0	Predicted ORF in Assemblies 19, 20 and 21; decreased transcription is observed upon fluphenazine treatment or in an azole-resistant strain that overexpresses CDR1 and CDR2
orf19.2625	0.957	0.836	1.576	0.255	0	0
orf19.2626	1.199	no replicates	0.856	no replicates	#N/A	#N/A
orf19.2627	1.105	no replicates	0.959	no replicates	#N/A	#N/A
orf19.2629	0.935	0.602	0.92	0.539	0	S. cerevisiae ortholog Uso1p has role in SNARE complex assembly, Golgi vesicle docking, ER to Golgi vesicle-mediated transport and localizes to ER to Golgi transport vesicle membrane, Golgi membrane
orf19.263	0.919	no replicates	0.644	no replicates	#N/A	#N/A
orf19.263.1	NO DATA	NO DATA	NO DATA	NO DATA	0	Predicted ORF in Assembly 20 and 21; gene has intron
orf19.2630	0.962	0.72	1.088	0.0767	RAD59	Protein involved in homologous recombination and DNA breaks repair; similar to S. cerevisiae Rad59p; N-terminal similarity with Rad52p
orf19.2631	0.862	0.136	1.05	0.411	0	Hap43p-induced gene
orf19.2632	0.778	no replicates	1.301	no replicates	#N/A	#N/A
orf19.2633	0.945	0.679	1.072	0.493	HGT14	Putative glucose transporter of the major facilitator superfamily; 20 member C. albicans glucose transporter family; 12 probable membrane-spanning segments; expressed in rich medium with 2% glucose; late-stage biofilm-induced
orf19.2633.1	NO DATA	NO DATA	NO DATA	NO DATA	0	0
orf19.2634	0.928	no replicates	1.001	no replicates	#N/A	#N/A
orf19.2636	1.158	no replicates	1.028	no replicates	#N/A	#N/A
orf19.2637	0.861	0.232	0.935	0.537	0	0
orf19.2638	1.037	0.888	0.848	0.281	0	0
orf19.2639	0.906	0.429	1.036	0.632	0	0
orf19.2639.1	0.833	no replicates	1.029	no replicates	0	S. cerevisiae ortholog Lsm7p has RNA binding and has role in nuclear mRNA splicing, via spliceosome, maturation of SSU-rRNA, nuclear-transcribed mRNA catabolic process
orf19.264	0.803	0.106	0.96	0.736	0	0
orf19.2640	1.004	0.966	1.141	0.0613	FUR1	Uracil phosphoribosyltransferase; predicted tetrameric enzyme of pyrimidine salvage; mutations associated with flucytosine resistance in clade I clinical isolates; flucytosine, macrophage-induced protein; levels decrease in stationary phase
orf19.2641	1.092	0.403	1.157	0.0539	ARP1	Putative centractin; induced upon adherence to polystyrene
orf19.2642	1.006	0.934	1.12	0.393	0	0
orf19.2643	0.926	0.476	1.145	0.0376	RPO26	Putative RNA polymerase subunit; heterozygous null mutant exhibits resistance to parnafungin in the C. albicans fitness test
orf19.2644	0.978	0.826	0.912	0.134	QCR2	Ubiquinol-cytochrome-c reductase; antigenic; induced by interaction with macrophage; repressed by nitric oxide; in detergent-resistant membrane fraction (possible lipid raft component); levels decrease in stationary phase; Hap43p-repressed
orf19.2645	1.256	0.187	4.4	no replicates	0	0
orf19.2646	0.993	0.905	1.04	0.498	ZCF13	Predicted zinc-finger protein; not essential for viability
orf19.2647	0.978	0.877	1.038	0.479	ZCF14	Putative transcription factor with zinc cluster DNA-binding motif; caspofungin induced
orf19.2649	0.837	0.0381	0.755	0.0109	PCL1	Cyclin homolog; expression induced upon filamentous growth; transcription is induced in response to alpha pheromone in SpiderM medium
orf19.265	1.204	0.648	0.74	0.189	0	Biofilm-induced gene
orf19.2650	0.893	0.227	0.928	0.234	0	0
orf19.2650.1	0.92	0.41	1.067	0.315	0	S. cerevisiae ortholog Mrp10p has structural constituent of ribosome, has role in mitochondrial translation, mitochondrial respiratory chain complex assembly and localizes to mitochondrial small ribosomal subunit
orf19.2651	0.893	0.244	1.174	0.0523	CAM1-1	Putative translation elongation factor; genes encoding ribosomal subunits, translation factors, tRNA synthetases are downregulated upon phagocytosis by murine macrophages; Hap43p-induced gene
orf19.2652	1.088	0.828	1.463	0.501	TEF4	Putative translation elongation factor; genes encoding ribosomal subunits, translation factors, and tRNA synthetases are downregulated upon phagocytosis by murine macrophage
orf19.2653	1.036	0.707	1.042	0.563	0	Protein not essential for viability
orf19.2654	0.806	0.0954	1.187	0.0189	RMS1	Putative lysine methyltransferase; Hap43p-induced gene; protein induced during the mating process; possibly an essential gene, disruptants not obtained by UAU1 method
orf19.2655	1.138	0.229	0.899	0.145	BUB3	Protein similar to S. cerevisiae Bub3p, a kinetochore checkpoint component; induced under hydroxyurea treatment; biofilm- and planktonic growth-induced gene
orf19.2656	0.713	no replicates	0.489	no replicates	#N/A	#N/A
orf19.2657	1.213	no replicates	0.76	no replicates	0	0
orf19.2658	0.875	no replicates	1.008	no replicates	#N/A	#N/A
orf19.2659	NO DATA	NO DATA	NO DATA	NO DATA	#N/A	#N/A
orf19.2660	0.916	0.16	1.126	0.213	EAF3	Subunit of the NuA4 histone acetyltransferase complex
orf19.2661	1.434	no replicates	1.052	no replicates	TLO34	Non-telomeric member of a family of telomere-proximal genes of unknown function; predicted N-terminus is extended, relative to that of other family members; overlaps orf19.2662
orf19.2662	0.905	no replicates	1.104	no replicates	0	Predicted ORF in Assemblies 19, 20 and 21; overlaps TLO34/orf19.2661
orf19.2663	0.932	0.437	0.859	0.0165	0	0
orf19.2664	0.949	0.625	0.931	0.198	0	S. cerevisiae ortholog Mkt1p has role in interspecies interaction between organisms, positive regulation of translation, response to DNA damage stimulus and localizes to cytoplasm, polysome
orf19.2665	0.977	0.795	1.016	0.787	MSN5	S. cerevisiae ortholog Msn5p has importin-alpha export receptor activity, has role in tRNA re-export from nucleus, protein export from nucleus and localizes to nucleus, cytoplasm
orf19.2666	1.029	no replicates	1.098	no replicates	#N/A	#N/A
orf19.2667	0.781	0.0133	1.181	0.0733	RPF1	Putative nucleolar protein with a predicted role in the assembly and export of the large ribosomal subunit; essential for growth
orf19.2668	0.521	no replicates	0.988	no replicates	RHD2	Predicted ORF in retrotransposon Tca4 with similarity to the Gag region encoding nucleocapsid-like protein; overlaps blocked reading frame orf19.2668.1; decreased expression in hyphae compared to yeast-form cells
orf19.2668.1	NO DATA	NO DATA	NO DATA	NO DATA	0	Region in retrotransposon Tca4 annotated in Assembly 21 as a blocked reading frame, based on comparative genome analysis; overlaps orf19.2668, which is an open reading frame similar to Gag proteins of retrotransposons
orf19.2669	0.685	0.0474	1.097	0.393	0	Predicted ORF in retrotransposon Tca4 with similarity to the Pol region of retrotransposons encoding reverse transcriptase, protease and integrase; downstream from RHD2 with similarity to the Gag region encoding nucleocapsid-like protein
orf19.267	0.927	0.419	0.981	0.784	0	Protein required for normal filamentous growth; mRNA binds to She3p
orf19.2670	1.209	0.0938	0.863	0.034	0	S. cerevisiae ortholog Htd2p has 3-hydroxyacyl-[acyl-carrier-protein] dehydratase activity, has role in fatty acid biosynthetic process and localizes to mitochondrion
orf19.2671	0.484	no replicates	0.814	no replicates	0	Predicted ORF in Assemblies 19, 20 and 21; Plc1p-regulated; possibly an essential gene, disruptants not obtained by UAU1 method
orf19.2672	1.023	0.796	0.875	0.108	NCP1	NADPH-cytochrome P450 reductase, acts with Erg11p in sterol 14 alpha-demethylation in ergosterol biosynthesis; subject to hypoxic regulation; ketoconazole-induced; caspofungin repressed
orf19.2673	0.954	0.626	1.092	0.267	0	0
orf19.2674	1.474	0.0486	0.752	0.0441	0	Putative transcription factor with zinc finger DNA-binding motif; Hap43p-repressed gene
orf19.2675	0.836	0.121	1.022	0.611	0	0
orf19.2676	0.753	0.0313	1.029	0.622	0	S. cerevisiae ortholog Iki1p has role in regulation of transcription from RNA polymerase II promoter, tRNA modification and localizes to nucleus, Elongator holoenzyme complex, cytoplasm
orf19.2677	1.185	0.228	0.814	0.0279	0	Putative GPI transamidase component; possibly an essential gene, disruptants not obtained by UAU1 method
orf19.2678	0.97	0.576	1.167	0.0459	BUB1	Putative cell cycle checkpoint kinase; mutation confers increased sensitivity to nocodazole
orf19.268	0.976	0.858	0.899	0.194	0	0
orf19.2680	0.992	0.945	0.824	0.0232	0	S. cerevisiae ortholog Dnf3p has phospholipid-translocating ATPase activity, has role in intracellular protein transport, phospholipid translocation and localizes to trans-Golgi network transport vesicle
orf19.2681	0.766	0.413	0.579	0.638	RBT7	Protein with similarity to RNase T2 enzymes, has putative secretion signal; expression is Tup1p-repressed
orf19.2682	0.913	0.531	1.016	0.837	0	S. cerevisiae ortholog Toa1p has role in transcription initiation from RNA polymerase II promoter and localizes to transcription factor TFIIA complex
orf19.2684	1.035	0.654	1.062	0.275	0	0
orf19.2685	1.032	0.818	0.851	0.0608	PGA54	Putative GPI-anchored protein; hyphal induced; Hog1p-downregulated; induced in a cyr1 or efg1 homozygous null mutant; shows colony morphology-related gene regulation by Ssn6p; upregulated in an RHE model; mRNA binds to She3p
orf19.2686	1.221	0.164	0.992	0.92	0	S. cerevisiae ortholog Cps1p has carboxypeptidase activity, has role in nitrogen compound metabolic process, proteolysis involved in cellular protein catabolic process and localizes to fungal-type vacuole lumen
orf19.2687.1	0.943	0.434	1.149	0.11	0	S. cerevisiae ortholog Rpb10p has DNA-directed RNA polymerase activity, RNA-directed RNA polymerase activity and has role in transcription from RNA polymerase I promoter, transcription from RNA polymerase II promoter
orf19.2688	0.721	0.00674	1.142	0.15	NAN1	Putative U3 snoRNP protein; Hap43p-induced gene; physically interacts with TAP-tagged Nop1p
orf19.269	0.847	0.11	1.023	0.792	SES1	Seryl-tRNA synthetase; charges the tRNA that recognizes the CUG codon, which typically specifies Leu, but specifies Ser in C. albicans; complements S. cerevisiae ses1 mutant viability; soluble protein in hyphae; macrophage-regulated
orf19.2690	1.068	0.548	0.905	0.151	0	S. cerevisiae ortholog Mgm1p has role in mitochondrial fusion, mitochondrial genome maintenance
orf19.2691	1.144	0.28	1.061	0.599	0	Planktonic growth-induced gene
orf19.2692	1.734	no replicates	NO DATA	NO DATA	#N/A	#N/A
orf19.2693	4.453	0.00116	3.151	8.04e-06	GST2	Putative glutathione S transferase; increased transcription upon benomyl treatment and in populations of cells exposed to fluconazole over multiple generations; regulated by Nrg1p, Tup1p; induced by nitric oxide; stationary phase enriched
orf19.2694	0.942	0.598	0.957	0.213	TYS1	Putative tRNA-Tyr synthetase; genes encoding ribosomal subunits, translation factors, and tRNA synthetases are downregulated upon phagocytosis by murine macrophages; stationary phase enriched protein
orf19.2695	1.094	0.239	0.972	0.754	UBR1	Protein similar to S. cerevisiae Ubr1p ubiquitin-protein ligase; transposon mutation affects filamentous growth
orf19.2697	0.989	0.895	0.983	0.824	0	0
orf19.2698	1.142	0.216	1.098	0.214	0	S. cerevisiae ortholog Emc6p has role in protein folding in endoplasmic reticulum and localizes to ER membrane protein complex
orf19.2699	1.537	0.0203	0.836	0.042	ABP1	Protein similar to S. cerevisiae Abp1p, which is an actin-binding protein of the cortical actin cytoskeleton; caspofungin induced; protein only detected in stationary phase yeast-form cultures
orf19.27	1.075	0.47	1.046	0.357	0	0
orf19.270	0.774	0.189	1.166	0.148	0	0
orf19.2701	0.669	0.698	1.315	0.478	0	Predicted ORF in Assemblies 19, 20 and 21; greater mRNA abundance observed in a cyr1 or ras1 homozygous null mutant than in wild type
orf19.2703	1.089	0.525	0.97	0.708	0	Protein similar to S. cerevisiae Ymr171cp; transcriptionally regulated by iron; induced in a ssr1 null mutant; fungal-specific (no human or murine homolog)
orf19.2704	NO DATA	NO DATA	2.483	no replicates	0	0
orf19.2706	0.729	0.0595	0.965	0.506	CRH11	GPI-anchored cell wall transglycosylase, putative ortholog of S. cerevisiae Crh1p; predicted glycosyl hydrolase domain; similar to Csf4p and to antigenic A. fumigatus Aspf9; predicted Kex2p substrate; caspofungin-induced
orf19.2707.1	0.962	0.765	1.187	0.0486	QCR9	Putative ubiquinol cytochrome c reductase; shows colony morphology-related gene regulation by Ssn6p
orf19.2708	0.849	0.124	1.19	0.0401	0	S. cerevisiae ortholog Sdo1p has role in ribosomal subunit export from nucleus, ribosomal large subunit biogenesis, rRNA processing and localizes to nucleus, preribosome, large subunit precursor, cytoplasm, polysome
orf19.2709	0.827	0.0962	1.164	0.105	ZUO1	Protein similar to S. cerevisiae Zuo1p, which is a cytosolic ribosome-associated chaperone; likely to be essential for growth, based on an insertional mutagenesis strategy
orf19.271	0.828	0.29	2.4	no replicates	ADH4	Protein not essential for viability; transcription is increased in an azole-resistant strain overexpressing MDR1; transcription is increased in populations of cells exposed to fluconazole over multiple generations
orf19.2710	1.137	0.188	0.984	0.826	0	S. cerevisiae ortholog Glc8p has enzyme activator activity, has role in chromosome segregation and localizes to nucleus, cytoplasm
orf19.2711	0.831	0.0854	1.084	0.178	0	Predicted ORF in Assemblies 19, 20 and 21; downregulated in core stress response
orf19.2711.1	0.948	0.634	1.108	0.202	0	Ortholog of S. cerevisiae Srb2p
orf19.2712	0.711	0.0114	1.182	0.0645	HCA4	Putative role in regulation of cell wall biogenesis; upregulated in biofilm; Hap43p-induced gene; possibly an essential gene, disruptants not obtained by UAU1 method
orf19.2713	0.816	0.197	1.037	0.946	0	S. cerevisiae ortholog Msh5p has role in reciprocal meiotic recombination and localizes to nucleus
orf19.2714	1.4	no replicates	0.796	no replicates	#N/A	#N/A
orf19.2715	0.789	0.0562	1.189	0.0118	RPC53	S. cerevisiae ortholog Rpc53p has DNA-directed RNA polymerase activity, has role in tRNA transcription from RNA polymerase III promoter and localizes to DNA-directed RNA polymerase III complex
orf19.2717	0.766	0.0174	1.243	0.0182	SAS10	Putative U3-containing small subunit processome complex subunit; Hap43p-induced gene; mutation confers resistance to 5-fluorocytosine (5-FC); repressed upon high-level peroxide stress
orf19.272	0.569	0.0761	0.456	0.00157	FAA21	Predicted acyl CoA synthetase; upregulated upon phagocytosis; transcription is regulated by Nrg1p and Mig1p
orf19.2720	0.98	0.847	0.982	0.623	0	S. cerevisiae ortholog Cct4p has unfolded protein binding, has role in protein folding and localizes to chaperonin-containing T-complex
orf19.2721	1.164	0.191	1.109	0.261	0	S. cerevisiae ortholog Cdc123p has role in regulation of mitotic cell cycle, regulation of translation and localizes to cytoplasm
orf19.2722	1.123	0.0457	0.829	0.0859	CGR1	Negative regulator of yeast-form growth; HSP70 family member; induced by growth cessation at yeast-hyphal transition or in planktonic growth; physically interacts with Msi3p; similar to rat anti-aging gene, SMP30, stationary phase enriched
orf19.2723	0.75	0.0354	1.204	0.0756	HIT1	Biofilm-induced gene; S. cerevisiae ortholog HIT1 localizes to cytoplasm, nucleus
orf19.2724	1.183	0.198	0.904	0.31	0	Hap43p-repressed gene; late-stage biofilm-induced
orf19.2725	1.092	no replicates	1.253	0.429	0	0
orf19.2726	1.242	0.166	1.254	0.0891	0	Putative plasma membrane protein; Plc1p-regulated
orf19.2727	0.963	0.597	0.98	0.6	GRX3	Putative glutaredoxin; flucytosine induced; regulated by Gcn4p; repressed in response to amino acid starvation (3-aminotriazole treatment)
orf19.2728	0.894	0.237	1.051	0.345	0	S. cerevisiae ortholog Rad24p has DNA clamp loader activity, has role in reciprocal meiotic recombination, DNA damage checkpoint, nucleotide-excision repair and localizes to nucleus, Rad17 RFC-like complex
orf19.273	0.951	0.671	0.954	0.526	0	S. cerevisiae ortholog Nsg2p has unfolded protein binding, has role in sterol biosynthetic process and localizes to endoplasmic reticulum
orf19.2730	1.076	no replicates	0.842	no replicates	0	0
orf19.2731	1.082	no replicates	1.182	no replicates	0	0
orf19.2732	0.994	no replicates	1.194	no replicates	#N/A	#N/A
orf19.2733	0.868	0.138	1.025	0.69	0	Putative subunit of phosphatidylinositol 3-kinase complexes I and II; transcription is activated in the presence of elevated CO2
orf19.2734	0.733	0.194	1.392	0.31	0	Protein not essential for viability
orf19.2735	0.788	0.0657	1.619	0.000219	SEN2	Putative tRNA splicing endonuclease subunit; Hap43p-induced; mutation confers hypersensitivity to toxic ergosterol analog, and to amphotericin B; has intron in 5'-UTR
orf19.2736	0.732	0.00839	0.933	0.207	HFL2	HAP5-like protein; flucytosine induced
orf19.2737	1.46	0.00413	0.765	0.015	0	Ortholog of S. cerevisiae Ydr109cp
orf19.2738	0.943	0.686	0.799	0.00232	SUL2	Putative sulfate transporter; transcription is negatively regulated by Sfu1p; induced upon biofilm formation; amphotericin B induced
orf19.2739	1.301	0.0392	1.091	0.235	0	Ortholog of C. glabrata Cagl0k02453gp
orf19.274	0.917	0.505	1.237	0.0408	TFC4	Putative RNA polymerase III transcription initiation factor complex (TFIIIC) subunit; transcriptionally activated by Mnl1p under weak acid stress; possibly an essential gene, disruptants not obtained by UAU1 method
orf19.2740	0.998	0.978	1.033	0.668	0	0
orf19.2742	NO DATA	NO DATA	NO DATA	NO DATA	0	0
orf19.2743	NO DATA	NO DATA	NO DATA	NO DATA	0	0
orf19.2745	0.754	0.456	0.728	0.799	UME7	Putative transcription factor with zinc cluster DNA-binding motif; similar to S. cerevisiae Ume6p, which is a transcription factor involved in the regulation of meiotic genes
orf19.2746	0.997	0.98	0.993	0.894	0	S. cerevisiae ortholog Emp70p has role in endosome transport, invasive growth in response to glucose limitation, pseudohyphal growth, cellular copper ion homeostasis, vacuolar transport
orf19.2747	1.005	0.96	0.826	0.133	RGT1	Transcriptional repressor involved in the regulation of glucose transporter genes; has zinc-cluster; similar to S. cerevisiae Rgt1p
orf19.2748	1.019	0.832	0.947	0.62	ARG83	Zinc-finger protein; clade-associated gene expression; null mutant shows abnormal regulation of invasive colony growth and is unable to utilize proline as a nitrogen source; late-stage biofilm-induced
orf19.2749	0.953	0.594	1.182	0.0912	0	Biofilm-induced gene; transcriptionally activated by Mnl1p under weak acid stress
orf19.275	1.018	0.949	1.119	0.0894	0	S. cerevisiae ortholog Pop5p has ribonuclease MRP activity, ribonuclease P activity, has role in intronic box C/D snoRNA processing, mRNA cleavage and localizes to ribonuclease MRP complex, nucleolar ribonuclease P complex
orf19.2751	0.928	0.613	1.025	0.772	0	Predicted membrane transporter, member of the monocarboxylate porter (MCP) family, major facilitator superfamily; Hap43p-induced gene; alkaline upregulated by Rim101p; possibly an essential gene, disruptants not obtained by UAU1 method
orf19.2752	1.041	0.657	0.967	0.674	ADR1	Putative transcription factor with zinc finger DNA-binding motif; similar to S. cerevisiae Adr1p but mutant phenotype suggests that it has a different set of target genes; transposon mutation affects filamentous growth
orf19.2753	0.87	0.0693	0.933	0.251	ZCF15	Predicted zinc-finger protein
orf19.2754	1.03	0.7	1.012	0.822	0	S. cerevisiae ortholog Tim13p has protein transporter activity, has role in protein import into mitochondrial inner membrane and localizes to mitochondrial intermembrane space protein transporter complex
orf19.2755	1.145	0.235	0.773	0.0388	0	S. cerevisiae ortholog Pre7p has role in proteasomal ubiquitin-dependent protein catabolic process, proteasomal ubiquitin-independent protein catabolic process and localizes to proteasome core complex, beta-subunit complex
orf19.2756	1.195	0.292	0.695	0.00051	0	S. cerevisiae ortholog Erd2p has HDEL sequence binding, has role in ER to Golgi vesicle-mediated transport, protein retention in ER lumen and localizes to integral to endoplasmic reticulum membrane
orf19.2757	0.844	0.0921	0.985	0.853	0	0
orf19.2758	0.618	0.0983	0.611	0.000786	PGA38	Putative GPI-anchored protein; adhesin-like protein; repressed during cell wall regeneration; possibly an essential gene, disruptants not obtained by UAU1 method
orf19.2759	0.372	no replicates	0.635	no replicates	#N/A	#N/A
orf19.276	1.07	0.679	0.779	0.0102	0	Plasma membrane-associated protein; increased transcription is observed in an azole-resistant strain that overexpresses MDR1; Hap43p-repressed gene
orf19.2760	1.094	0.566	0.958	0.616	0	Putative mRNA cleavage and polyadenylation factor; heterozygous null mutant exhibits hypersensitivity to parnafungin and cordycepin in the C. albicans fitness test
orf19.2761	1.121	0.346	0.898	0.178	0	Putative glycosylphosphatidylinositol (GPI) anchor assembly protein; transposon insertion causes decreased colony wrinkling but does not block true hyphal growth; induced by nitric oxide independent of Yhb1p
orf19.2762	1.036	0.826	1.08	0.425	AHP1	Putative alkyl hydroperoxide reductase; immunogenic in mouse; biofilm-induced; fluconazole-induced; amphotericin B, caspofungin, alkaline downregulated; induced in core stress response; regulated by Ssk1p, Nrg1p, Tup1p, Ssn6p, Hog1p, Hap43p
orf19.2763	1.02	0.735	0.95	0.251	0	Protein not essential for viability; orf19.10279 possibly transcriptionally regulated upon hyphal formation
orf19.2765	1.274	0.211	0.861	0.0839	PGA62	Adhesin-like cell wall protein; putative GPI-anchor; fluconazole-induced; regulated by iron; expression greater in high iron; induced during cell wall regeneration; Cyr1p or Ras1p downregulated; positively regulated by Tbf1p
orf19.2766	NO DATA	NO DATA	0.921	no replicates	0	0
orf19.2767	1.145	0.394	1.047	0.452	PGA59	Adhesin-like cell wall protein; putative GPI-anchor; shows colony morphology-related gene regulation by Ssn6p; Hap43p-induced gene
orf19.2768	1.105	0.74	0.921	0.29	AMS1	Putative alpha-mannosidase; transcription is regulated by Nrg1p; induced during cell wall regeneration; biofilm- and planktonic growth-induced gene
orf19.2769	2.749	0.0353	0.949	0.201	0	Putative protease B inhibitor; hyphal-induced expression; Cyr1p- and Ras1p-repressed
orf19.277	1.021	0.906	0.901	0.113	THI6	Putative thiamin-phosphate pyrophosphorylase, hydroxyethylthiazole kinase; fungal-specific (no human or murine homolog)
orf19.2770	1.951	0.034	0.941	0.427	0	0
orf19.2770.1	2.221	0.0455	0.946	0.469	SOD1	Cytosolic copper- and zinc-containing superoxide dismutase, involved in protection from oxidative stress and required for full virulence; alkaline upregulated by Rim101p; upregulated in the presence of human blood
orf19.2771	1.154	0.273	0.969	0.733	BEM3	Putative GTPase-activating protein (GAP) for Rho-type GTPase Cdc42p; involved in cell signaling pathways that control cell polarity; similar to S. cerevisiae Bem3p
orf19.2772	1.103	0.215	0.932	0.317	HOS3	Histone deacetylase; similar to S. cerevisiae Hos3p; greater expression and longer mRNA in white cells, compared to opaque cells; has conserved deacetylation motif
orf19.2774	0.804	0.0638	1.191	0.036	LAB5	S. cerevisiae ortholog Lip5p has role in protein lipoylation and localizes to mitochondrion
orf19.2775	0.967	0.826	0.946	0.555	IDI1	S. cerevisiae ortholog Idi1p has isopentenyl-diphosphate delta-isomerase activity, has role in farnesyl diphosphate biosynthetic process and localizes to nucleus, cytoplasm
orf19.2777	0.802	no replicates	0.944	no replicates	#N/A	#N/A
orf19.2778	0.985	0.948	0.799	0.0353	0	Putative protein of unknown function, transcription is upregulated in clinical isolates from HIV+ patients with oral candidiasis
orf19.2779	0.742	0.0282	0.91	0.764	0	Hap43p-repressed gene
orf19.278	1.052	0.837	1.005	0.983	0	0
orf19.2780	1.402	no replicates	1.207	no replicates	#N/A	#N/A
orf19.2781	0.891	0.532	1.099	0.682	0	Predicted ORF in Assemblies 19, 20 and 21; possibly an essential gene, disruptants not obtained by UAU1 method
orf19.2782	1.114	0.185	0.918	0.206	0	S. cerevisiae ortholog Grx5p has disulfide oxidoreductase activity, has role in cellular response to oxidative stress, response to osmotic stress and localizes to mitochondrial matrix
orf19.2783	2.372	0.117	0.698	0.267	PIR32	Putative cell wall structural component; macrophage-induced gene
orf19.2784	1.303	0.106	0.907	0.356	0	0
orf19.2785	0.969	0.771	1.004	0.963	ATP7	Putative subunit of the F1F0-ATPase complex; shows colony morphology-related gene regulation by Ssn6p; farnesol-, macrophage-downregulated protein abundance; protein present in exponential and stationary yeast growth phases; Hap43p-induced
orf19.2786	1.033	0.604	0.911	0.149	0	Ortholog of S. cerevisiae Apl3p
orf19.2787	1.082	0.755	0.9	0.305	PRY1	Extracellular protein; transcription is opaque specific; transcription is repressed in response to alpha pheromone in SpiderM medium; possibly an essential gene, disruptants not obtained by UAU1 method
orf19.2788	0.828	0.06	1.079	0.36	0	0
orf19.2789	0.8	0.0885	0.985	0.841	0	0
orf19.279	1.38	no replicates	0.76	no replicates	0	Hap43p-repressed gene
orf19.2790	1.014	0.807	0.975	0.66	SWD2	Ortholog of S. cerevisiae Swd2p
orf19.2791	1.254	0.0379	0.844	0.054	BBC1	Putative SH3-domain-containing protein
orf19.2792	1.041	0.761	0.882	0.0977	IST2	S. cerevisiae ortholog Ist2p has lipid binding and localizes to cellular bud membrane
orf19.2794	0.946	0.56	1.072	0.129	0	Putative non-specific single-domain racemase; regulated by Gcn4p; repressed in response to amino acid starvation (3-AT treatment); alkaline upregulated; macrophage-induced protein
orf19.2795	0.844	0.119	1.219	0.00456	0	S. cerevisiae ortholog Lhp1p has tRNA binding, has role in tRNA processing and localizes to nucleoplasm, nucleolus
orf19.2796	1.316	0.077	0.997	0.952	0	S. cerevisiae ortholog Pol12p has DNA-directed DNA polymerase activity, has role in telomere capping, DNA-dependent DNA replication initiation and localizes to nuclear envelope, alpha DNA polymerase:primase complex
orf19.2797	1.499	0.0305	0.656	0.12	0	0
orf19.2798	0.986	0.852	1.002	0.966	0	Putative helicase; fungal-specific (no human or murine homolog)
orf19.2799	1.086	0.408	0.979	0.683	GPI8	Protein similar to S. cerevisiae Gpi8p, which is a subunit of the GPI transamidase complex that adds GPI anchors to proteins; likely to be essential for growth, based on an insertional mutagenesis strategy
orf19.28	0.943	0.795	1.205	0.0782	0	S. cerevisiae ortholog Tpc1p has thiamine transmembrane transporter activity, has role in thiamine pyrophosphate transport and localizes to integral to mitochondrial inner membrane
orf19.280	0.865	no replicates	0.798	no replicates	0	0
orf19.2800	NO DATA	NO DATA	NO DATA	NO DATA	0	0
orf19.2801	1.019	no replicates	0.96	no replicates	#N/A	#N/A
orf19.2802	1.298	no replicates	0.986	no replicates	#N/A	#N/A
orf19.2803	0.881	0.0614	0.899	0.14	HEM13	Coproporphyrinogen III oxidase; antigenic; localizes to yeast cell surface, not hyphae; iron-regulated expression; macrophage-downregulated; not Rfg1p regulated, farnesol-induced; possibly essential; Hap43p-repressed gene; biofilm-induced
orf19.2804	0.653	0.192	NO DATA	NO DATA	0	0
orf19.2805	0.927	0.366	0.842	0.0739	PEX8	Putative peroxisomal biogenesis factor; expression regulated during planktonic growth
orf19.2806	0.894	no replicates	0.729	no replicates	#N/A	#N/A
orf19.2808	0.985	0.913	0.936	0.491	ZCF16	Predicted zinc-finger protein; not essential for viability
orf19.2809	1.144	0.811	0.813	0.675	CTN3	Predicted peroxisomal carnitine acetyl transferase; Ura+ deletion strain has no obvious metabolic, hyphal, or virulence defects; transcription induced by macrophage engulfment, hyphal growth, starvation, or nonfermentable carbon sources
orf19.281	1.252	no replicates	0.929	no replicates	0	0
orf19.2810	0.989	0.907	0.865	0.06	AAP1	Putative amino acid permease; fungal-specific (no human or murine homolog); possibly an essential gene, disruptants not obtained by UAU1 method
orf19.2812	1.428	0.0129	1.434	0.108	0	S. cerevisiae ortholog Sng1p has role in nucleobase, nucleoside, nucleotide and nucleic acid transport and localizes to plasma membrane
orf19.2813	0.686	no replicates	0.804	no replicates	0	0
orf19.2814	NO DATA	NO DATA	3.2	no replicates	#N/A	#N/A
orf19.2815	1.207	no replicates	0.98	no replicates	#N/A	#N/A
orf19.2818	0.968	0.665	1.229	0.018	0	0
orf19.2819	0.936	0.357	1.025	0.771	0	0
orf19.2820	1.031	0.855	0.95	0.316	0	S. cerevisiae ortholog Nup57p has role in NLS-bearing substrate import into nucleus, nuclear pore organization and localizes to Nic96 complex
orf19.2821	0.929	0.459	1.015	0.792	0	Hap43p-repressed gene; repressed by nitric oxide
orf19.2822	0.849	0.255	1.107	0.163	0	0
orf19.2823	0.984	0.928	0.768	0.00112	RFG1	Transcriptional regulator of filamentous growth and hyphal genes; acts in Tup1p-dependent and -independent pathways; binds DNA; has HMG domain; not transcriptionally regulated by oxygen or serum; not responsible for hypoxic repression
orf19.2824	0.992	no replicates	0.87	no replicates	#N/A	#N/A
orf19.2825	2.356	7.77e-05	1.822	4.46e-05	0	Putative cytosolic Fe-S protein assembly protein; Hap43p-repressed gene; a-specific transcription
orf19.2826	0.97	0.73	0.828	0.023	0	0
orf19.2827	0.794	0.0263	1.037	0.609	0	0
orf19.2828	0.952	0.741	0.948	0.436	0	S. cerevisiae ortholog Alf1p has alpha-tubulin binding, microtubule binding, has role in post-chaperonin tubulin folding pathway and localizes to nucleus, cytoplasm
orf19.2829	0.871	0.266	1.262	0.00721	0	S. cerevisiae ortholog Pga2p has role in protein transport and localizes to endoplasmic reticulum, nuclear envelope
orf19.2830	0.718	0.00104	1.2	0.0217	RRP9	Ribosomal protein; Hap43p-induced gene; mutation confers resistance to 5-fluorocytosine (5-FC), 5-fluorouracil (5-FU), and tubercidin (7-deazaadenosine); physically interacts with TAP-tagged Nop1p
orf19.2831	0.964	0.639	0.936	0.122	RPC31	Putative RNA polymerase III subunit C31; repressed by nitric oxide; induced during infection of murine kidney, compared to growth in vitro; has murine homolog
orf19.2832	0.987	0.858	1.215	0.00217	INN1	Protein with similarity to S. cerevisiae Inn1p, which is an essential protein of the contractile actomyosin ring required for ingression of the plasma membrane into the bud neck during cytokinesis; contains a C2 membrane targeting domain
orf19.2833	1.132	0.753	0.956	0.913	PGA34	Putative GPI-anchored protein; transcription is repressed in response to alpha pheromone in SpiderM medium; late-stage biofilm-induced gene
orf19.2834	0.898	0.229	1.07	0.426	RPD3	Histone deacetylase; regulates frequency of white-to-opaque and opaque-to-white switching; greater expression in white cells than opaque cells; has conserved deacetylation motif
orf19.2835	0.894	0.0684	0.933	0.216	0	S. cerevisiae ortholog Aos1p has SUMO activating enzyme activity, has role in protein sumoylation and localizes to SUMO activating enzyme complex
orf19.2836	1.09	0.431	1.07	0.613	0	Protein with similarity to carbonic anhydrases
orf19.2837	1.121	0.184	0.911	0.0946	ALG5	Putative glucosyltransferase involved in cell wall mannan biosynthesis; possibly an essential gene, disruptants not obtained by UAU1 method
orf19.2838	1.053	0.864	1.582	0.167	0	Late-stage biofilm-induced gene; mutation confers hypersensitivity to amphotericin B
orf19.2839	0.958	0.771	1.257	0.106	CIRT4B	Cirt family transposase; decreased transcription is observed in an azole-resistant strain that overexpresses CDR1 and CDR2; Hap43p-repressed gene; biofilm-induced
orf19.284	1.215	no replicates	0.831	no replicates	0	0
orf19.2840	1.166	no replicates	0.871	no replicates	#N/A	#N/A
orf19.2841	1.295	0.0285	0.811	0.00259	PGM2	Ortholog of S. cerevisiae PGM2; induced during biofilm formation and in planktonic culture; Tye7p-regulated
orf19.2842	0.94	0.276	0.938	0.346	GZF3	Putative transcription factor; oxidative stress-induced via Cap1p; null mutant exhibits abnormal colony morphology and altered sensitivity to fluconazole, LiCl, and copper
orf19.2843	0.959	0.626	1.011	0.81	RHO1	Small GTPase of Rho family; regulates beta-1,3-glucan synthesis activity and binds Gsc1p; essential; expected to be geranylgeranylated by geranylgeranyltransferase type I; plasma membrane-localized
orf19.2844	0.866	0.195	0.806	0.0654	0	Predicted ORF in Assemblies 19, 20 and 21; induced in core caspofungin response
orf19.2846	1.488	0.104	0.96	0.736	0	Hap43p-repressed gene; induced in core caspofungin response; transcription regulated upon yeast-hyphal switch
orf19.2847	0.753	0.00747	1.033	0.474	0	S. cerevisiae ortholog Rpc82p has DNA-directed RNA polymerase activity, has role in tRNA transcription from RNA polymerase III promoter and localizes to DNA-directed RNA polymerase III complex
orf19.2847.1	0.981	0.84	1.051	0.668	0	Pseudogene; formerly an ORF Predicted by Annotation Working Group that was subsequently removed from Assembly 20
orf19.2848	0.943	0.716	0.727	0.00819	0	S. cerevisiae ortholog Atg13p has protein kinase regulator activity and has role in CVT pathway, activation of protein kinase activity, mitochondrion degradation, macroautophagy, piecemeal microautophagy of nucleus
orf19.2849	0.324	0.422	1.453	0.574	AQY1	Aquaporin water channel; mutant has increased resistance to osmotic shock; required for wild-type tolerance of freezing; not required for virulence in a mouse model of systemic infection; flucytosine repressed; biofilm-induced gene
orf19.285	1.233	0.109	1.017	0.794	0	0
orf19.2850	0.948	0.628	0.955	0.35	0	Protein of unknown function; induced by nitric oxide independent of Yhb1p
orf19.2851	0.842	0.109	0.819	0.0528	0	Putative ornithine transport protein; localized to the mitochondrial membrane
orf19.2852	0.913	0.388	1.067	0.294	0	0
orf19.2853	1.015	0.883	0.891	0.177	0	0
orf19.2857	0.999	0.996	1.069	0.427	0	Ortholog of S. cerevisiae Ssl2p
orf19.2859	0.82	0.121	1.111	0.0819	SRP40	Putative chaperone of small nucleolar ribonucleoprotein particles; macrophage/pseudohyphal-induced
orf19.286	1.084	0.435	1.264	0.23	0	Decreased transcription is observed upon fluphenazine treatment
orf19.2862	2.216	0.000116	1.653	0.000122	RIB1	Putative GTP cyclohydrolase II; enzyme of riboflavin biosynthesis; fungal-specific (no human or murine homolog)
orf19.2863	1.079	0.556	0.843	0.00401	0	0
orf19.2863.1	1.663	0.01	1.238	0.00998	0	S. cerevisiae ortholog Erv1p has flavin-linked sulfhydryl oxidase activity and has role in cellular iron ion homeostasis, cellular response to oxidative stress, protein import into mitochondrial intermembrane space
orf19.2864	NO DATA	NO DATA	NO DATA	NO DATA	#N/A	#N/A
orf19.2864.1	0.951	0.541	1.038	0.236	RPL28	Putative ribosomal protein; Plc1p-regulated; genes encoding cytoplasmic ribosomal subunits, translation factors, and tRNA synthetases are downregulated upon phagocytosis by murine macrophage
orf19.2865	1.568	no replicates	1.183	no replicates	#N/A	#N/A
orf19.2866	1.104	no replicates	1.472	no replicates	0	0
orf19.2867	1.226	0.0467	0.928	0.172	0	S. cerevisiae ortholog Vps5p has protein transporter activity, phosphatidylinositol-3-phosphate binding and has role in protein retention in Golgi apparatus, retrograde transport, endosome to Golgi
orf19.2868	NO DATA	NO DATA	NO DATA	NO DATA	0	Predicted ORF in Assemblies 19, 20 and 21; transcription is induced in response to alpha pheromone in SpiderM medium
orf19.2869	0.723	no replicates	1.949	0.5	0	0
orf19.287	0.958	0.691	1.004	0.959	0	Putative NADH-ubiquinone oxidoreductase subunit; Hap43p-repressed gene; repressed by nitric oxide; identified in detergent-resistant membrane fraction (possible lipid raft component)
orf19.2870	2.543	0.0362	1.031	0.93	0	0
orf19.2871	1.026	0.591	0.9	0.019	SDH12	Succinate dehydrogenase; soluble protein in hyphae; macrophage-downregulated protein level; downregulated by Efg1p; repressed by nitric oxide; protein present in exponential and stationary growth phase yeast cultures; Hap43p-repressed gene
orf19.2873	1.071	0.37	1.036	0.538	TOP2	DNA topoisomerase II; catalyzes ATP-dependent DNA relaxation and decatenation in vitro; Y842 predicted to be catalytic; functional homolog of S. cerevisiae Top2p; sensitive to amsacrine or doxorubicin; farnesol-upregulated in biofilm
orf19.2875	1.01	0.787	1.225	0.00737	0	Hap43p-induced gene
orf19.2876	1.116	0.14	0.801	0.0312	CBF1	Transcription factor that binds upstream of ribosomal protein genes and the rDNA locus, with Tbf1p; also regulates sulfur starvation-response, respiratory, and glycolytic genes; does not bind to centromeres as does S. cerevisiae Cbf1p
orf19.2877	1.478	0.203	1.432	0.0154	PDC11	Putative pyruvate decarboxylase; antigenic; at hyphal cell surface, not yeast-form cells; regulated by Hap43p, Gcn4p, Efg1p, Efh1p, Hsf1; fluconazole-, farnesol-, biofilm-induced; repressed upon amino acid starvation; sumoylation target
orf19.2878	1.15	0.464	2.593	0.111	PGA15	Putative GPI-anchored protein
orf19.2879	0.825	0.857	0.578	0.126	IFF5	Putative GPI-anchored protein; adhesin-like protein; planktonic growth-induced gene; possibly an essential gene, disruptants not obtained by UAU1 method
orf19.288	0.863	0.301	0.828	0.0447	MET13	Putative methionine biosynthesis protein; ketoconazole-induced; amphotericin B repressed
orf19.2881	0.967	0.622	0.825	0.00462	MNN4	Protein required for normal mannosylphosphorylation of oligosaccharides linked to cell wall proteins, not required for virulence or kidney colonization in mouse systemic infection or for normal interaction with macrophages
orf19.2882	1.069	0.376	1.032	0.503	XUT1	Putative high-affinity, high-capacity xanthine-uric acid/H+ symporter; similar to A. nidulans UapA; member of the Nucleobase-Ascorbate Transporter/Nucleobase-Cation Symporter (NAT/NCS2) family
orf19.2883	1.008	0.953	0.719	0.000223	CSO99	Hap43p-repressed gene, protein not conserved in S. cerevisiae
orf19.2884	1.007	0.931	0.897	0.158	CDC68	Functional homolog of S. cerevisiae Cdc68p, which is a transcription elongation factor; essential; possible drug target
orf19.2885	0.951	0.552	1.235	0.0304	PRI2	Putative DNA primase; gene adjacent to and divergently transcribed with CDC68; Hap43p-induced gene
orf19.2886	0.932	0.585	0.777	0.000819	CEK1	ERK-family protein kinase, required for wild-type yeast-hyphal switching, mating efficiency, and virulence in a mouse model; Cst20p-Hst7p-Cek1p-Cph1p MAPK pathway regulates mating, and invasive hyphal growth under some conditions
orf19.2887	0.966	0.678	0.913	0.0553	0	S. cerevisiae ortholog Ymr295cp localizes to ribosome, mating projection tip, cellular bud
orf19.2888	1.015	0.775	0.884	0.0819	0	0
orf19.2889	0.923	0.324	1.053	0.238	0	S. cerevisiae ortholog Ies6p localizes to nucleus
orf19.2890	1.003	0.98	1.122	0.0617	0	0
orf19.2891	1.066	0.451	1.02	0.533	0	S. cerevisiae ortholog Afg1p has role in cellular response to oxidative stress, protein import into peroxisome matrix, misfolded or incompletely synthesized protein catabolic process and localizes to mitochondrial inner membrane
orf19.2892	0.867	0.132	0.974	0.607	0	0
orf19.2893	0.795	0.00962	1.193	0.0122	0	Putative protein of unknown function, regulation correlates with clinical development of fluconazole resistance; transcription is upregulated in an RHE model of oral candidiasis
orf19.2894	NO DATA	NO DATA	NO DATA	NO DATA	#N/A	#N/A
orf19.2895	1.119	0.284	0.955	0.369	VMA8	Protein similar to the S. cerevisiae Vma8p subunit of vacuolar H+-ATPase; transcription is regulated by Nrg1p and Mig1p; transcription is increased in populations of cells exposed to fluconazole over multiple generations
orf19.2896	1.137	0.284	0.752	0.00752	SOU1	Enzyme involved in utilization of L-sorbose; has sorbitol dehydrogenase, fructose reductase, and sorbose reductase activities; NAD-binding site motif; transcriptional regulation affected by chromosome 5 copy number; Hap43p-induced gene
orf19.2897	0.727	0.549	1.482	no replicates	SOU2	Protein similar to Sou1p; not required for utilization of L-sorbose
orf19.2898	0.989	0.855	1.069	0.101	0	S. cerevisiae ortholog Bor1p has borate efflux transmembrane transporter activity, has role in protein targeting to vacuole, borate transport and localizes to fungal-type vacuole, plasma membrane
orf19.2899	2.016	0.275	0.01*	no replicates	0	0
orf19.29	0.908	0.266	1.005	0.934	0	Late-stage biofilm-induced gene
orf19.290	1.011	0.891	0.83	0.0264	KRE5	Predicted UDP-glucose:glycoprotein glucosyltransferase; required for wild-type 1,6-beta-D-glucan biosynthesis, hyphal growth, and virulence in mouse IV infection; production in S. cerevisiae partially complements defects of a kre5 mutant
orf19.2901	0.86	0.116	0.864	0.0593	NUP60	Protein not essential for viability; similar to S. cerevisiae Nup60p, which is a subunit of the nuclear pore complex
orf19.2903	0.984	0.907	0.828	0.0373	0	Putative Argonaute protein involved in RNA silencing, member of the Argonaute family; hyphal-induced expression, regulated by Cyr1p, Ras1p, Efg1p, Nrg1p, Tup1p
orf19.2904	0.917	no replicates	0.839	no replicates	#N/A	#N/A
orf19.2905	0.865	0.429	1.032	0.813	0	0
orf19.2906	1.008	0.943	0.875	0.5	PGA41	Putative GPI-anchored protein; adhesin-like protein
orf19.2907	1.077	0.763	0.468	0.478	PGA42	Putative GPI-anchored adhesin-like protein; decreased transcription is observed in azole-resistant strains that overexpress CDR1 and CDR2 or MDR1
orf19.2907.1	0.993	0.923	0.977	0.672	0	S. cerevisiae ortholog Pcc1p has chromatin DNA binding and has role in positive regulation of transcription from RNA polymerase II promoter by pheromones, threonylcarbamoyladenosine metabolic process
orf19.2908	0.903	0.387	0.822	0.0256	0	0
orf19.2909	0.942	0.528	0.852	0.0356	ERG26	C-3 sterol dehydrogenase, catalyzes the second of three steps required to remove two C-4 methyl groups from an intermediate in ergosterol biosynthesis; amphotericin B, caspofungin repressed
orf19.291	0.896	0.169	1.018	0.744	0	S. cerevisiae ortholog Wss1p has role in response to UV-C, protein sumoylation, response to UV-B, response to DNA damage stimulus and localizes to nuclear envelope
orf19.2910	1.108	0.507	1.297	0.275	PGA43	Putative GPI-anchored protein
orf19.2911	0.963	0.696	0.902	0.161	SEC3	Predicted subunit of the exocyst complex, involved in exocytosis; required for hyphal growth after the first septin ring formation; interacts with septins Cdc3p, Cdc10p, and Cdc11p; localizes to a crescent on the surface of the hyphal tip
orf19.2913	0.949	no replicates	1.028	no replicates	#N/A	#N/A
orf19.2914	0.969	0.739	0.89	0.212	0	0
orf19.2915	0.995	0.937	1.008	0.932	0	S. cerevisiae ortholog Ynd1p has nucleoside-triphosphatase activity, nucleoside-diphosphatase activity, has role in protein glycosylation and localizes to membrane, microsome, Golgi apparatus, COPI-coated vesicle
orf19.2916	0.526	0.723	2.275	0.00976	0	0
orf19.2917	0.736	0.000737	1.179	0.0365	0	Putative GTPase; heterozygous null mutant exhibits resistance to parnafungin in the C. albicans fitness test; Hap43p-induced gene
orf19.2917.1	NO DATA	NO DATA	NO DATA	NO DATA	0	0
orf19.2919	1.082	0.449	1.041	0.498	MPH1	Protein similar to S. cerevisiae Mph1p, which is a DNA helicase involved in DNA repair; induced under hydroxyurea treatment
orf19.292	NO DATA	NO DATA	NO DATA	NO DATA	0	0
orf19.2920	0.946	0.602	1.189	0.0802	0	S. cerevisiae ortholog Tma20p has role in ribosome biogenesis and localizes to ribosome, cytoplasm
orf19.2921	0.921	0.424	1.004	0.958	0	S. cerevisiae ortholog Pac2p has alpha-tubulin binding and has role in protein folding
orf19.2922	0.947	0.929	1.014	0.958	0	S. cerevisiae ortholog Hop2p has double-stranded DNA binding, has role in synapsis, reciprocal meiotic recombination and localizes to condensed nuclear chromosome
orf19.2923	1.028	0.791	0.854	0.106	0	Predicted membrane transporter, member of the drug:proton antiporter (14 spanner) (DHA2) family, major facilitator superfamily (MFS); transcription is induced in response to alpha pheromone in SpiderM medium
orf19.2924	0.997	no replicates	1.061	no replicates	#N/A	#N/A
orf19.2925	1.242	0.0907	0.739	0.0579	0	S. cerevisiae ortholog Cin4p has role in protein folding and localizes to cytoplasm
orf19.2926	1.206	0.158	0.966	0.517	0	S. cerevisiae ortholog Pso2p has 5'-3' exonuclease activity, damaged DNA binding and has role in DNA repair
orf19.2927	0.925	0.265	1.003	0.947	MNN11	S. cerevisiae ortholog Mnn11p has alpha-1,6-mannosyltransferase activity, has role in protein glycosylation and localizes to alpha-1,6-mannosyltransferase complex
orf19.2928	0.972	0.808	0.976	0.488	0	S. cerevisiae ortholog Yol107wp localizes to Golgi apparatus, COPI-coated vesicle
orf19.2929	0.952	0.718	0.927	0.308	GSC1	Subunit of beta-1,3-glucan synthase; essential; gsc1 allele determines resistance/sensitivity to echinocandin antifungals; 16 predicted membrane-spanning regions; mRNA abundance declines after yeast-to-hyphal transition; fungal-specific
orf19.2930	0.913	0.146	0.868	0.0612	0	S. cerevisiae ortholog Ygr054wp has translation initiation factor activity, has role in translational initiation and localizes to ribosome, cytosolic small ribosomal subunit
orf19.2933	0.871	0.284	0.86	0.0925	0	S. cerevisiae ortholog Otu1p has ubiquitin-specific protease activity, has role in regulation of transcription, DNA-dependent, protein deubiquitination and localizes to nucleus, cytoplasm
orf19.2934	0.744	0.115	1.485	0.00135	0	S. cerevisiae ortholog Bud20p has role in cellular bud site selection and localizes to nucleus
orf19.2935	1.06	0.51	1.033	0.578	RPL10	Ribosomal protein L10; intron in 5'-UTR; genes encoding cytoplasmic ribosomal subunits, translation factors, and tRNA synthetases downregulated upon phagocytosis by murine macrophage; transcription regulated upon yeast-hyphal switch
orf19.2936	1.181	0.0417	1.037	0.66	0	0
orf19.2937	0.861	0.0157	0.983	0.767	PMM1	Phosphomannomutase; enzyme of O- and N-linked mannosylation; interconverts mannose-6-phosphate and mannose-l-phosphate; functional homolog of S. cerevisiae Sec53p; antigenic during murine systemic infection; Hap43p-induced gene
orf19.2938	1.031	0.795	1.005	0.943	0	Putative mitochondrial inner membrane protein with a predicted role in the assembly of respiratory complex III; Hap43p-repressed gene; S. cerevisiae ortholog FMP25 localizes to mitochondrion
orf19.2939	1.304	0.0513	1.064	0.457	0	S. cerevisiae ortholog Fmp32p localizes to mitochondrion
orf19.2940	1.074	0.29	0.918	0.16	0	Putative v-SNARE of the endoplasmic reticulum membrane; possibly an essential gene, disruptants not obtained by UAU1 method
orf19.2941	0.774	0.127	1.75	0.278	SCW4	Putative cell wall protein; exogenously expressed protein is a substrate for Kex2p processing in vitro; expression is regulated upon white-opaque switching; alkaline downregulated; possibly essential gene (UAU1 method); biofilm-induced
orf19.2942	0.778	0.0104	1.191	0.0584	DIP5	Putative dicarboxylic amino acid permease; mutation confers hypersensitivity to toxic ergosterol analog; transcriptionally induced upon phagocytosis by macrophage; Gcn4p-regulated; upregulated by Rim101p at pH 8
orf19.2943	0.873	no replicates	1.185	no replicates	#N/A	#N/A
orf19.2943.5	1.966	0.29	1.339	0.184	0	0
orf19.2945	1.056	0.532	1.432	0.165	PUT4	Putative proline permease; fungal-specific (no human or murine homolog); repressed during the mating process
orf19.2946	1.071	0.754	1.707	0.263	HNM4	Putative choline permease; fungal-specific (no human or murine homolog)
orf19.2947	0.861	0.157	1.023	0.592	SNZ1	Stationary phase protein; soluble in hyphae; induced on yeast to hyphal switch, in response to 3-aminotriazole, or in azole-resistant strain overexpressing MDR1; regulated by Gcn4p, macrophage; no human/murine homolog
orf19.2948	0.72	0.164	1.054	0.13	SNO1	Protein with a predicted role in pyridoxine metabolism; expressed during stationary phase; transcription is regulated by Tup1p, Efg1p;
orf19.2949	0.853	0.0777	1.007	0.877	0	S. cerevisiae ortholog Iml1p localizes to extrinsic to fungal-type vacuolar membrane, Seh1-associated complex
orf19.295	NO DATA	NO DATA	NO DATA	NO DATA	0	0
orf19.2951	1.019	0.814	0.958	0.522	HOM6	Putative homoserine dehydrogenase; Gcn4p-regulated; induced in response to amino acid starvation (3-ATtreatment); macrophage-induced protein; protein level decreases in stationary phase cultures
orf19.2952	1.648	0.0545	1.262	0.0715	EXG2	GPI-anchored cell wall protein, similar to S. cerevisiae exo-1,3-beta-glucosidase Exg2p; predicted Kex2p substrate; induced during cell wall regeneration; possibly an essential gene, disruptants not obtained by UAU1 method; Hap43p-repressed
orf19.2953	1.01	0.926	1.115	0.395	TOM20	Putative mitochondrial primary import receptor
orf19.2954	0.991	0.914	0.839	0.0606	0	Hap43p-repressed gene; repressed by nitric oxide
orf19.2956	1.004	0.971	1.024	0.669	MGM101	Putative mitochondrial genome maintenance protein; fungal-specific (no human or murine homolog); mutation confers hypersensitivity to tubercidin (7-deazaadenosine)
orf19.2957	1.573	no replicates	NO DATA	NO DATA	0	Protein required for transfer of mannosylphosphate; transcription is induced in response to alpha pheromone in SpiderM medium
orf19.2958	1.419	0.0511	0.929	0.65	0	Planktonic growth-induced gene
orf19.2959	0.848	no replicates	NO DATA	NO DATA	0	Predicted ORF from Assembly 19; removed from Assembly 20; subsequently reinstated in Assembly 21 based on comparative genome analysis
orf19.2959.1	1.671	0.0479	1.091	0.333	0	Gene induced by hypoxia and ketoconazole
orf19.296	NO DATA	NO DATA	NO DATA	NO DATA	0	0
orf19.2960	0.943	0.611	0.913	0.0668	FRS2	Putative tRNA-Phe synthetase; genes encoding ribosomal subunits, translation factors, tRNA synthetases are downregulated upon phagocytosis by murine macrophage; protein present in exponential and stationary growth phase yeast cultures
orf19.2961	1.102	0.372	0.932	0.288	0	Putative transcription factor with zinc finger DNA-binding motif
orf19.2962	0.748	0.0899	1.622	0.163	0	0
orf19.2963	0.991	0.939	1.011	0.889	0	0
orf19.2964	0.882	0.22	0.904	0.217	0	Ortholog of S. cerevisiae Rsc1p
orf19.2965	1.091	0.41	0.868	0.000391	0	Ortholog of S. cerevisiae Get3p
orf19.2965.1	NO DATA	NO DATA	NO DATA	NO DATA	0	Predicted ORF in Assembly 20 and 21; similar to human SERF2; gene has an alternatively spliced intron
orf19.2966	1.157	0.0568	1.012	0.768	0	Predicted ORF in Assemblies 19, 20 and 21; clade-associated gene expression; farnesol-downregulated
orf19.2967	0.881	0.191	1.049	0.168	TIF34	Putative translation initiation factor eIF3, p39 subunit; mutation confers hypersensitivity to roridin A and verrucarin A; ribosomal subunits, translation factors, tRNA synthetases are downregulated upon phagocytosis by murine macrophages
orf19.2968	0.96	0.949	2.094	0.13	0	0
orf19.2969	1.028	0.776	0.93	0.377	RAD16	Protein similar to S. cerevisiae Rad16p; flucytosine induced; planktonic growth-induced
orf19.297	NO DATA	NO DATA	NO DATA	NO DATA	DTD2	S. cerevisiae ortholog Dtd1p has D-tyrosyl-tRNA(Tyr) deacylase activity, has role in D-amino acid catabolic process and localizes to cytoplasm
orf19.2970	1.034	0.662	0.865	0.0297	LYS2	Large subunit of heterodimeric alpha-aminoadipate reductase; enzyme of lysine biosynthesis; contains predicted binding sites for AMP and alpha-aminoadipate; feedback inhibited by lysine or thialysine; regulated by Gcn2p and Gcn4p
orf19.2971	0.963	0.769	1.126	0.0429	0	0
orf19.2972	0.741	0.034	0.993	0.852	PDE2	Cyclic nucleotide phosphodiesterase, high affinity; role in moderating signaling via cAMP; required for wild-type virulence, hyphal growth, switching, and cell wall, but not for pseudohyphal growth; expressed shortly after hyphal induction
orf19.2973	0.755	0.0319	1.066	0.287	0	0
orf19.2974	0.97	0.88	0.96	0.537	YKT6	Putative protein of the vacuolar SNARE complex with a predicted role in vacuolar fusion
orf19.2975	0.839	0.156	0.941	0.339	YPT7	Protein of YPT/RAB family; induced during the mating process
orf19.2977	1.086	0.344	1.059	0.293	0	Hap43p-repressed gene
orf19.2978	1.124	0.0743	1.14	0.017	0	Hap43p-repressed gene
orf19.298	0.937	0.8	0.878	0.345	0	Biofilm- and planktonic growth-induced gene
orf19.2980	0.829	0.0753	1.103	0.166	0	0
orf19.2982	0.866	0.19	0.853	0.033	0	0
orf19.2983	0.974	0.775	0.991	0.887	CDC73	Protein similar to S. cerevisiae Cdc73p, which is a transcription elongation factor; cdc73 kap114 double transposon mutation affects filamentous growth
orf19.2984	1.148	0.358	0.883	0.0356	MST1	S. cerevisiae ortholog Mst1p has role in mitochondrial threonyl-tRNA aminoacylation and localizes to mitochondrion
orf19.2985	0.961	0.381	0.948	0.166	0	Hap43p-repressed gene
orf19.2986	0.842	0.233	0.97	0.781	0	0
orf19.2987	0.846	0.064	1.044	0.457	0	S. cerevisiae ortholog Mdm31p has role in mitochondrion inheritance, cellular ion homeostasis and localizes to nucleus, mitochondrial inner membrane
orf19.2988	1.158	0.315	0.738	0.00612	0	Biofilm-induced gene
orf19.2989	1.234	0.0913	0.997	0.975	GOR1	S. cerevisiae ortholog Gor1p has glyoxylate reductase activity, has role in glyoxylate catabolic process and localizes to nucleus, mitochondrion
orf19.299	0.892	0.0777	0.978	0.631	ECM14	S. cerevisiae ortholog Ecm14p has role in fungal-type cell wall organization and localizes to fungal-type vacuole
orf19.2990	0.902	0.563	1.178	0.00924	XOG1	Exo-1,3-beta-glucanase; 5 glycosyl hydrolase family member; affects sensitivity to chitin and glucan synthesis inhibitors; not required for yeast-to-hyphal transition or for virulence in mouse systemic infection; Hap43p-induced gene
orf19.2991	1.058	0.298	1.036	0.633	HOL1	Putative MFS transporter; transcription regulated by Nrg1p; macrophage/pseudohyphal-repressed; transcription induced by alpha pheromone in SpiderM medium; possibly an essential gene, disruptants not obtained by UAU1 method
orf19.2992	0.917	no replicates	0.993	no replicates	RPP1A	Conserved acidic ribosomal protein, likely involved in regulation of translation elongation; interacts with Rpp2Bp; one of four similar C. albicans ribosomal proteins (Rpp1Ap, Rpp1Bp, Rpp2Ap, Rpp2Bp); Hap43p-induced
[truncated: 4,853 more rows]

## Sheet: Up regulated
Genes up regulated in at least one time point
Systematic Name	Ratio 30 min	30 min t-test p-value	Ratio 60 min	60 min t-test p-value	name	description
orf19.113	215.4	0.00107	95.99	6.54e-06	CIP1	Possible oxidoreductase; transcription induced by cadmium but not by other heavy metals, heat shock, yeast-hyphal switch, oxidative stress (via Cap1p), or macrophage interaction; stationary phase enriched protein
orf19.3131	61.7	0.000909	30.13	2.87e-06	OYE32	NAD(P)H oxidoreductase family protein; induced by nitric oxide, amphotericin B, oxidative stress (via Cap1p); increased transcription associated with MDR1 overexpression or benomyl treatment; macrophage-downregulated protein abundance
orf19.5604	24.98	0.00201	42.8	1.16e-06	MDR1	Plasma membrane multidrug efflux pump; MDR major facilitator transporter superfamily; methotrexate is preferred substrate; overexpression in drug-resistant clinical isolates confers fluconazole resistance; repressed in young biofilms
orf19.3139	23.76	0.000136	3.842	5.47e-08	0	Hap43p-repressed gene; increased transcription is observed upon benomyl treatment; oxidative stress-induced via Cap1p
orf19.2285	17.63	0.00476	14.65	3.35e-05	0	Increased transcription is observed upon benomyl treatment
orf19.251	16.43	4.27e-08	2.994	9.48e-06	0	ThiJ/PfpI protein; binds human immunoglobulin E; 2 N-glycosylation motifs; alkaline, fluconazole, Hog1p-downregulated; induced in core stress response or by oxidative stress (via Cap1p); induced by hypoxia, Hap43p; stationary-phase enriched
orf19.5285	15.56	0.00992	6.958	1.14e-07	PST3	Putative flavodoxin; biofilm induced; fungal-specific (no human or murine homolog); stationary phase enriched protein
orf19.3443	11.7	0.000898	6.748	4.21e-07	OYE2	Putative NAPDH dehydrogenase; fungal-specific (no human or murine homolog); induced by nitric oxide
orf19.1149	11.42	0.00492	6.223	1.56e-07	MRF1	Putative mitochondrial respiratory protein; induced by farnesol, benomyl treatment, nitric oxide, core stress response; oxidative stress-induced via Cap1p; stationary-phase enriched protein
orf19.2262	11.28	0.00238	6.234	5.68e-10	0	Protein similar to quinone oxidoreductases; increased transcription upon benomyl treatment; induced by nitric oxide; oxidative stress-induced via Cap1p; stationary-phase enriched protein
orf19.6898	9.273	0.00303	9.889	7.11e-10	0	Predicted ORF in Assemblies 19, 20 and 21; increased transcription is observed upon benomyl treatment or in an azole-resistant strain that overexpresses MDR1
orf19.3121	9.049	0.0181	1.588	0.0403	GST1	Putative glutathione S-transferase; upregulated in the presence of human neutrophils; expression is regulated upon white-opaque switching; increased transcription is observed upon benomyl treatment
orf19.7042	8.096	0.00248	7.62	0.00199	0	Increased transcription is observed upon benomyl treatment or in an azole-resistant strain that overexpresses MDR1; induced by nitric oxide
orf19.1763	6.616	0.0278	3.001	0.000108	IFR1	Predicted ORF in Assemblies 19, 20 and 21; induced by nitric oxide
orf19.5286	6.288	0.00619	3.602	4.1e-06	YCP4	Putative flavodoxin; fungal-specific (no human or murine homolog)
orf19.2396	5.712	0.000106	3.128	2.11e-07	IFR2	Zinc-binding dehydrogenase; upregulated by benomyl, ciclopirox olamine or alpha pheromone; regulated by oxidative stress (via Cap1p) and osmotic stress (via Hog1p); protein present in exponential and stationary phase; Hap43p-induced gene
orf19.5517	5.633	0.000167	1.952	4.42e-06	0	Similar to alcohol dehydrogenases; increased transcription is observed upon benomyl treatment; induced by nitric oxide; induced in core stress response; oxidative stress-induced via Cap1p
orf19.7306	5.539	0.033	3.896	1.62e-06	0	Aldo-keto reductase family protein; increased transcription associated with MDR1 overexpression, benomyl or long-term fluconazole treatment; overexpression does not affect drug or oxidative stress sensitivity; stationary phase enriched
orf19.847	5.318	0.000594	2.895	3.7e-05	YIM1	Protein similar to protease of mitochondrial inner membrane; increased transcription is observed upon benomyl treatment; macrophage-downregulated gene
orf19.1340	5.312	4.93e-05	1.582	0.00138	0	Putative aldose reductase; protein level decreases in stationary phase cultures
orf19.1237	5.082	0.0222	2.141	0.000198	ARO9	Aromatic transaminase of the Ehrlich fusel oil pathway of aromatic alcohol biosynthesis; Rim101p-dependent pH-regulation (alkaline induced); Hap43p-induced gene
orf19.3150	5.012	0.00443	3.405	3.53e-06	GRE2	Putative reductase; Nrg1p- and Tup1p-regulated; benomyl- and hyphal-induced; macrophage/pseudohyphal-repressed; expression greater in low iron; reported to be involved in osmotic stress response; stationary phase enriched protein
orf19.7531	4.633	0.0187	2.131	1.26e-06	0	Putative protein of unknown function; stationary phase enriched protein; transcription is induced upon yeast-hyphal transition; benomyl or caspofungin induced; Hap43p-repressed gene
orf19.720	4.582	0.00716	1.515	0.261	GST3	Putative glutathione S-transferase; expression is regulated upon white-opaque switching; upregulated in the presence of human neutrophils; peroxide-induced; induced in response to alpha pheromone in SpiderM medium
orf19.2693	4.453	0.00116	3.151	8.04e-06	GST2	Putative glutathione S transferase; increased transcription upon benomyl treatment and in populations of cells exposed to fluconazole over multiple generations; regulated by Nrg1p, Tup1p; induced by nitric oxide; stationary phase enriched
orf19.1048	3.835	0.00752	2.548	0.0173	IFD6	Aldo-keto reductase family member; similar to aryl alcohol dehydrogenases; increased protein correlates with MDR1 overexpression (but not CDR1 or CDR2) in fluconazole-resistant clinical isolates; farnesol regulated; possibly essential gene
orf19.1868	3.83	0.0409	1.825	0.0342	RNR22	Putative ribonucleoside diphosphate reductase; shows colony morphology-related gene regulation by Ssn6p; RNA abundance regulated by tyrosol and cell density; Hap43p-repressed gene; biofilm- and planktonic growth-induced
orf19.3234	3.777	0.023	1.713	0.000788	OYE22	Putative NADPH dehydrogenase; transcription is upregulated in both intermediate and mature biofilms
orf19.3122	3.609	1.75e-06	2.951	1.19e-08	ARR3	Protein not essential for viability; similar to S. cerevisiae Arr3p, an arsenite transporter of the plasma membrane required for resistance to arsenic compounds; benomyl-induced; Gcn4p-regulated; Hap43p-repressed
orf19.4309	3.59	0.00439	1.756	6.74e-07	GRP2	Methylglyoxal reductase; regulation associated with azole resistance; induced in core stress response or by oxidative stress (via Cap1p), fluphenazine, benomyl, or with long term fluconazole treatment; Hap43p-induced; antigenic in humans
orf19.238	3.449	0.000998	1.47	1.04e-05	CCP1	Similar to cytochrome-c peroxidase N terminus; transcription is negatively regulated by Rim101p or alkaline pH; transcription induced by interaction with macrophage or low iron; oxygen-induced activity; Hap43p-repressed gene
orf19.1167	3.29	0.0406	2.175	0.0089	0	S. cerevisiae ortholog Jlp1p has sulfonate dioxygenase activity and has role in sulfur compound catabolic process
orf19.1162	3.22	0.0109	2.398	8.66e-07	0	Predicted ORF in Assemblies 19, 20 and 21; increased transcription is observed upon benomyl treatment
orf19.7611	3.179	0.00238	1.543	5.88e-05	TRX1	Thioredoxin, involved in response to reactive oxygen species; biofilm, benomyl, flucytosine, peroxide, Hap43p induced; amphotericin B, caspofungin repressed; upregulated in the presence of human neutrophils; macrophage-downregulated gene
orf19.6586	3.138	0.035	2.88	3.02e-05	0	Late-stage biofilm-induced gene; increased transcription observed upon benomyl treatment or in an azole-resistant strain that overexpresses MDR1; shows colony morphology-related regulation by Ssn6p; induced by nitric oxide; Hap43p-repressed
orf19.4980	3.087	0.00145	0.467	0.000183	HSP70	Putative hsp70 chaperone; role in entry into host cells; heat-shock, amphotericin B, cadmium, ketoconazole-induced; farnesol-downregulated in biofilm; surface localized in yeast-form and hyphal cells; antigenic in host
orf19.2500	2.998	0.00226	1.625	0.000308	0	0
orf19.2624	2.991	0.0381	2.285	0.118	0	Predicted ORF in Assemblies 19, 20 and 21; decreased transcription is observed upon fluphenazine treatment or in an azole-resistant strain that overexpresses CDR1 and CDR2
orf19.6059	2.908	0.001	2.024	0.000151	TTR1	Putative glutaredoxin; described as a glutathione reductase; upregulated in the presence of human neutrophils, and upon benomyl treatment; alkaline downregulated; regulated by Gcn2p and Gcn4p; required for virulence in mouse model
orf19.6844	2.833	0.031	0.322	0.000155	ICL1	Isocitrate lyase; enzyme of glyoxylate cycle; required for virulence in murine infection; no mammalian homolog; induced upon phagocytosis by macrophage; farnesol regulated; Pex5p-dependent peroxisomal localization; stationary phase enriched
orf19.2461	2.8	0.00461	2.263	5.67e-06	PRN4	Protein with similarity to pirins; increased transcription is observed upon benomyl treatment
orf19.4449	2.766	0.00493	1.655	0.00331	0	S. cerevisiae ortholog Ccs1p has superoxide dismutase copper chaperone activity, has role in intracellular copper ion transport and localizes to nucleus, cytosol, mitochondrial inner membrane
orf19.2769	2.749	0.0353	0.949	0.201	0	Putative protease B inhibitor; hyphal-induced expression; Cyr1p- and Ras1p-repressed
orf19.1421	2.644	0.0107	1.318	0.0498	0	S. cerevisiae ortholog Dal3p has ureidoglycolate hydrolase activity
orf19.2244	2.616	0.000317	0.603	0.00051	0	Similar to oxidoreductases and to S. cerevisiae Yjr096wp; transcription is negatively regulated by Sfu1p; increased transcription upon benomyl treatment; decreased expression in an ssr1 null mutant; Hap43p-repressed gene
orf19.2870	2.543	0.0362	1.031	0.93	0	0
orf19.2531	2.46	0.0338	1.153	0.471	CSP37	Plasma membrane, hyphal cell wall protein; role in progression of murine systemic infection; predicted P-loop, divalent cation binding, N-glycosylation sites; expressed in yeast and hyphae; hyphal downregulated; stationary-phase enriched
orf19.1027	2.456	0.0471	2.278	2.58e-05	PDR16	Phosphatidylinositol transfer protein; increased transcription correlates with CDR1 and CDR2 overexpression and azole resistance; induced by fluphenazine, 17-beta-estradiol, ethynyl estradiol, nitric oxide; farnesol-downregulated in biofilm
orf19.6758	2.431	0.0497	1.357	0.0116	0	0
orf19.2369.1	2.389	0.00337	1.608	0.000163	ATX1	Putative cytosolic copper metallochaperone; flucytosine induced gene; expression downregulated in an ssr1 null mutant
orf19.2825	2.356	7.77e-05	1.822	4.46e-05	0	Putative cytosolic Fe-S protein assembly protein; Hap43p-repressed gene; a-specific transcription
orf19.2481	2.249	0.00517	1.229	0.00714	0	0
orf19.2770.1	2.221	0.0455	0.946	0.469	SOD1	Cytosolic copper- and zinc-containing superoxide dismutase, involved in protection from oxidative stress and required for full virulence; alkaline upregulated by Rim101p; upregulated in the presence of human blood
orf19.2862	2.216	0.000116	1.653	0.000122	RIB1	Putative GTP cyclohydrolase II; enzyme of riboflavin biosynthesis; fungal-specific (no human or murine homolog)
orf19.3508	2.198	0.00293	1.247	0.0179	0	Putative protein of unknown function; stationary phase enriched protein
orf19.3639	2.161	0.00306	1.425	0.00247	0	S. cerevisiae ortholog Mag1p has alkylbase DNA N-glycosylase activity and has role in DNA dealkylation involved in DNA repair, base-excision repair, AP site formation
orf19.5258	2.156	0.00463	1.681	0.000105	0	Predicted ORF in Assemblies 19, 20 and 21; induced by nitric oxide
orf19.1623	2.11	0.000674	1.738	0.00023	CAP1	Transcription factor, AP-1 bZIP family; role in oxidative stress response and resistance, multidrug resistance; oxidative stress regulates nuclear localization; partially complements S. cerevisiae yap1 mutation; human neutrophil-ind
orf19.2202	2.093	0.0455	1.508	0.0251	0	Predicted ORF in Assemblies 19, 20 and 21; transcription is induced in response to alpha pheromone in SpiderM medium
orf19.3292	2.076	0.00114	0.701	0.000508	0	S. cerevisiae ortholog Mxr2p has peptide-methionine (R)-S-oxide reductase activity, has role in cellular response to oxidative stress and localizes to mitochondrion
orf19.5674	2.069	0.0161	1.126	0.506	PGA10	Plasma membrane protein of heme-iron utilization; allows utilization of hemin and hemoglobin as iron sources in host tissues; predicted GPI anchor; biofilm, hypoxia, ketoconazole, ciclopirox, or hyphal-induced; upregulated by Rim101p at pH8
orf19.7550	2.025	0.0343	1.383	0.00227	IFA14	Putative LPF family protein; Plc1p-regulated; transcription is induced in response to alpha pheromone in SpiderM medium
orf19.5672	1.997	0.000794	1.465	0.000364	MEP2	Ammonium permease and regulator of nitrogen starvation-induced filamentation; 11 predicted transmembrane regions; in low nitrogen cytoplasmic C-terminus activates Ras/cAMP and MAPK signal transduction pathways to induce filamentation
orf19.2463	1.993	0.00657	1.851	0.000193	PRN2	Protein similar to pirin; Hap43p-repressed gene
orf19.5860	1.984	0.0495	1.792	0.000901	0	Predicted ORF from Assembly 19; removed from Assembly 20; subsequently reinstated in Assembly 21 based on comparative genome analysis
orf19.3151	1.972	0.0201	1.381	0.0108	0	0
orf19.2770	1.951	0.034	0.941	0.427	0	0
orf19.424	1.921	0.00402	0.808	0.00947	TRP99	Putative thioredoxin peroxidase/alkyl hydroperoxide reductase; transcriptionally regulated by iron; expression greater in low iron; regulated by Gcn4p; induced in response to amino acid starvation (3-aminotriazole treatment)
orf19.5784	1.911	0.0116	1.699	3.29e-05	AMO1	Putative peroxisomal copper amine oxidase
orf19.4543	1.907	0.0382	0.783	0.00305	UGA2	Protein not essential for viability; similar to S. cerevisiae Uga2p, which is succinate semialdehyde dehydrogenase with a role in glutamate catabolism; transcription regulated by Mig1p, Tup1p, Gcn4p
orf19.1979	1.906	0.00109	1.282	0.0106	GIT3	Putative glycerophosphoinositol permease; fungal-specific (no human/murine homolog); alkaline downregulated; transcription specific to white cell type; caspofungin, macrophage/pseudohyphal-repressed; biofilm-induced
orf19.5059	1.896	0.0113	1.474	0.0683	GCS1	Gamma-glutamylcysteine synthetase; enzyme of glutathione synthesis, required for virulence; induced on early/intermediate biofilm formation, in low iron, H2O2, Cd, or presence of human neutrophils; possibly adherence-induced
orf19.344	1.885	0.000146	1.803	0.018	0	Predicted ORF in Assemblies 19, 20 and 21; increased transcription is observed upon fluphenazine treatment or in an azole-resistant strain that overexpresses CDR1 and CDR2; possibly transcriptionally regulated by Tac1p
orf19.314	1.885	0.0206	0.949	0.541	0	S. cerevisiae ortholog Stb2p localizes to Sin3-type complex
orf19.4842	1.879	0.0201	1.595	0.11	0	0
orf19.1724	1.878	0.00209	1.975	9.36e-06	0	Protein of unknown function; induced by nitric oxide independent of Yhb1p
orf19.2568	1.865	0.0393	0.833	0.0548	IFU5	Predicted membrane protein; estradiol-induced; increased transcription associated with CDR1 and CDR2 overexpression or fluphenazine treatment; putative drug-responsive regulatory site; similar to S. cerevisiae Wwm1p; Hap43p-repressed gene
orf19.4784	1.862	0.000716	0.466	0.0419	CRP1	Plasma membrane copper transporter; CPx P1-type ATPase; mediates Cu resistance; similar to proteins of Menkes and Wilson disease; copper-induced; Tbf1p-activated; suppresses Cu sensitivity of S. cerevisiae cup1 mutant; biofilm-induced
orf19.6478	1.861	0.00396	1.648	8.07e-05	YCF1	Putative glutathione S-conjugate transporter; MRP/CFTR-subfamily, ABC transporter family; human neutrophil-induced; oxidative stress-induced via Cap1p; possible association with multidrug resistance; possibly an essential gene (UAU1 method)
orf19.6318	1.856	0.0208	1.045	0.577	0	S. cerevisiae ortholog Yjr085cp localizes to mitochondrion
orf19.1078	1.817	0.00362	1.133	0.334	HBR2	Putative alanine glyoxylate aminotransferase; regulated by Gcn4p and hemoglobin; stationary phase enriched protein
orf19.3448	1.812	0.0108	1.528	0.000259	0	Predicted ORF in Assemblies 19, 20 and 21; ketoconazole-repressed
orf19.321	1.781	0.000193	1.116	0.35	0	S. cerevisiae ortholog Mup3p has L-methionine transmembrane transporter activity and has role in amino acid transport
orf19.4147	1.77	0.00298	1.406	0.00105	GLR1	Glutathione reductase; upregulated by human neutrophils; oxidative stress-induced regulation via Cap1p; overexpression correlates with multidrug resistance in a cap1 mutant, farnesol induced; stationary phase enriched protein
orf19.4132	1.769	0.0447	0.95	0.581	0	UPF0057 protein family member; localized to the plasma membrane
orf19.3130	1.762	0.00442	1.883	1.18e-05	0	Predicted ORF in Assemblies 19, 20 and 21; possibly an essential gene, disruptants not obtained by UAU1 method
orf19.6274	1.757	0.0206	0.796	0.174	PBR1	Protein required for cohesion, adhesion, and biofilm formation; induced by alpha pheromone in white cells; fluconazole-induced
orf19.1497	1.748	0.00713	0.916	0.561	ZCF6	Putative transcription factor with zinc cluster DNA-binding motif
orf19.86	1.733	0.0263	1.061	0.531	0	Putative glutathione peroxidase; peroxide-induced; induced in response to peroxide, exposure to neutrophils and macrophage blood fractions; downregulated during infection of macrophages
orf19.5282	1.73	0.000496	1.527	0.00835	0	Hap43p-repressed gene; mRNA binds to She3p; decreased expression in hyphae compared to yeast-form cells; regulated by Efg1p and Efh1p; intron in 5'-UTR; transcriptionally activated by Mnl1p under weak acid stress
orf19.6941	1.73	0.0327	0.77	0.0213	0	Late-stage biofilm-induced gene
orf19.24	1.724	0.0145	0.862	0.0674	RTA2	Putative flippase required for sphingolipid long chain base release; mediates calcineurin-dependent resistance to azoles; stress-associated protein; Ca2+, calcineurin-regulated; ketoconazole, caspofungin induced; Plc1p-regulated
orf19.1275	1.724	0.0139	0.948	0.491	GAT1	Zinc finger transcriptional regulator of nitrogen utilization; required for nitrogen catabolite repression and utilization of isoleucine, tyrosine and tryptophan N sources; required for virulence in a mouse systemic infection model
orf19.3053	1.717	0.00856	1.003	0.968	0	Protein present in exponential and stationary growth phase yeast cultures; identified in extracts from biofilm and planktonic cells; biofilm-induced gene
orf19.7654	1.715	0.00177	0.542	3.25e-06	CPR6	Putative peptidyl-prolyl cis-trans isomerase; macrophage/pseudohyphal-repressed; heavy metal (cadmium) stress-induced; heterozygous null mutant displays sensitivity to virgineone
orf19.1065	1.706	0.0192	0.623	2.69e-05	SSA2	HSP70 family chaperone; found in cell wall fractions; antigenic; role in import of beta-defensin peptides; ATPase domain binds histatin 5; at surface of hyphae, not yeast-form cells; farnesol-downregulated in biofilm; caspofungin repressed
orf19.2336	1.704	0.0377	1.048	0.711	0	Ortholog of C. glabrata Cagl0g07667gp
orf19.6311	1.697	0.0122	1.206	0.206	0	Hap43p-induced gene
orf19.5259	1.691	0.0016	1.322	0.00853	0	0
orf19.5295	1.691	0.0308	0.572	0.000674	0	Predicted ORF in Assemblies 19, 20 and 21; transcription is induced in response to alpha pheromone in SpiderM medium
orf19.2346	1.687	0.00435	0.773	0.00851	0	Putative protein of unknown function, transcription is positively regulated by Tbf1p
orf19.7204	1.686	0.00356	0.967	0.652	0	S. cerevisiae ortholog Yjr149wp localizes to cytoplasm
orf19.2067	1.677	0.00653	1.341	0.00423	0	Putative protein with a predicted role in mitochondrial iron metabolism; Hap43p-repressed gene; expression upregulated during growth in the mouse cecum
orf19.6753	1.676	0.00279	0.676	0.000333	0	Predicted ORF in Assemblies 19, 20 and 21; possibly an essential gene, disruptants not obtained by UAU1 method
orf19.3507	1.674	0.0277	1.118	0.239	MCR1	Putative NADH-cytochrome-b5 reductase; soluble protein in hyphae; biofilm induced; alkaline downregulated; ketoconazole or flucytosine induced, farnesol-induced; protein present in exponential and stationary growth phase yeast cultures
orf19.3418	1.672	0.0467	1.066	0.661	0	0
orf19.2959.1	1.671	0.0479	1.091	0.333	0	Gene induced by hypoxia and ketoconazole
orf19.2863.1	1.663	0.01	1.238	0.00998	0	S. cerevisiae ortholog Erv1p has flavin-linked sulfhydryl oxidase activity and has role in cellular iron ion homeostasis, cellular response to oxidative stress, protein import into mitochondrial intermembrane space
orf19.4898	1.657	0.0275	1.119	0.0849	0	Putative protein of unknown function; increased expression in response to prostaglandins
orf19.2107	1.65	0.0181	0.954	0.398	MUQ1	Putative choline phosphate cytidylyltransferase/phosphoethanolamine cytidylyltransferase; decreased expression in hyphae compared to yeast-form cells; Hap43p-repressed gene; biofilm-induced
orf19.5257	1.63	0.00435	1.034	0.711	LCB4	Putative sphingosine kinase; expression is Tac1p-regulated
orf19.2480.1	1.628	0.00521	0.719	0.00243	AUT7	Putative autophagosome protein; macrophage/pseudohyphal-repressed; alternatively spliced intron in 5' UTR
orf19.6402	1.613	0.0135	1.101	0.115	CYS3	Cystathionine gamma-lyase; upregulated by alkaline, biofilm, amphotericin B, heavy metal (cadmium) stress, oxidative stress (via Cap1p); possibly adherence-induced; Hog1p regulated; levels decrease in stationary phase yeast cells
orf19.2172	1.606	0.0193	1.174	0.208	ARA1	D-Arabinose dehydrogenase; in dehydro-D-arabinono-1,4-lactone biosynthesis; NADP+ cofactor; active toward D-arabinose, L-fucose, L-xylose, L-galactose; inhibited by metal ions, thiol group-specific reagents; induced on polystyrene adherence
orf19.5770	1.601	0.00137	1.259	0.0504	OPT8	Possible oligopeptide transporter; similar to Opt1p and to S. cerevisiae Ygl114wp, but not other OPTs; induced by nitric oxide, amphotericin B; expression of OPT6, -7, or -8 does not suppress defect of mutant lacking Opt1p, Opt2p, and Opt3p
orf19.4975	1.594	0.00683	1.037	0.918	HYR1	Hyphal-induced GPI-anchored cell wall protein; macrophage-induced; repressed by neutrophil-co-culture; resistance to killing by neutrophils, azole resistance; regulated by Rfg1p, Efg1p, Nrg1p, Tup1p, Cyr1p, Bcr1p, Hap43p; biofilm-induced
orf19.4551	1.59	7.6e-05	0.896	0.115	CTN1	Predicted carnitine acetyl transferase; required for growth on nonfermentable carbon sources but not for hyphal growth or virulence in mouse systemic model; transcription induced in macrophage; macrophage/pseudohyphal-repressed after 16 hr
orf19.2107.1	1.582	0.0264	0.627	0.0113	STF2	Protein involved in ATP biosynthesis; decreased expression in hyphae vs yeast-form cells; downregulated by Efg1p, Hap43p; transcription upregulated in clinical isolates from HIV+ patients with oral candidiasis; biofilm-induced
orf19.6554	1.57	0.00518	1.154	0.317	0	Hap43p-repressed gene; expression upregulated by ketoconazole, by hypoxia and during growth in the mouse cecum
orf19.860	1.568	0.00782	1.146	0.277	BMT8	Putative beta-mannosyltransferase, member of a 9-gene family including characterized BMT genes with roles in beta-1,2-mannosylation of cell wall phosphopeptidomannan; transposon insertion in promoter region causes decreased colony wrinkling
orf19.6515	1.558	0.00648	0.64	0.000946	HSP90	Essential chaperone of Hsp90 family, activated by heat shock, stress; regulates several signal transduction pathways; localizes to surface of hyphae, not yeast cells; mediates echinocandin resistance
orf19.6464	1.557	0.0207	1.1	0.103	0	Predicted ORF in Assemblies 19, 20 and 21; induced upon adherence to polystyrene; oxidative stress-induced via Cap1p
orf19.2367	1.556	0.00374	1.27	0.0217	0	Putative protein of unknown function; Hap43p-induced gene; transcription is negatively regulated by Rim101p
orf19.2462	1.555	0.0249	1.972	4.43e-05	PRN3	Protein similar to pirin; transcriptionally activated by Mnl1p under weak acid stress; Hap43p-repressed gene
orf19.7207	1.55	0.00887	1.079	0.33	DOA4	Protein similar to S. cerevisiae Doa4p, a ubiquitin hydrolase, involved in recycling ubiquitin from proteasome-bound ubiquitinated intermediates; oxidative stress-induced via Cap1p; not essential for viability
orf19.780	1.55	0.0433	1.24	0.0377	DUR1,2	Urea amidolyase; urea carboxylase and allophanate hydrolase activities; hydrolyzes urea to CO2; needed for utilization of urea as nitrogen source and for hyphal switch in macrophage; transcription regulated by Nrg1p, Hap43p; biofilm-induced
orf19.459	1.55	0.00948	0.794	0.00323	ADP1	Putative PDR-subfamily ABC transporter; similar to WHITE subfamily proteins; gene used for strain identification by multilocus sequence typing
orf19.3395	1.544	0.00652	1.615	0.0289	0	Predicted membrane transporter, member of the drug:proton antiporter (12 spanner) (DHA1) family, major facilitator superfamily; induced by nitric oxide, oxidative stress, alpha pheromone; fungal-specific; Hap43p-repressed
orf19.1158	1.543	0.00655	0.976	0.828	0	Hap43p-repressed gene
orf19.2313	1.537	0.00649	0.907	0.104	0	Hap43p-repressed gene
orf19.2699	1.537	0.0203	0.836	0.042	ABP1	Protein similar to S. cerevisiae Abp1p, which is an actin-binding protein of the cortical actin cytoskeleton; caspofungin induced; protein only detected in stationary phase yeast-form cultures
orf19.4584	1.53	0.0469	0.884	0.141	PHO114	Acid phosphatase, transcriptionally activated by Mnl1p under weak acid stress
orf19.3140	1.525	0.0139	0.63	0.47	0	0
orf19.4757	1.518	0.00372	1.851	0.00102	NAR1	Putative cytosolic iron-sulfur (FeS) protein assembly machinery protein; induced by nitric oxide; oxidative stress-induced via Cap1p
orf19.1267.1	1.515	0.0098	1.359	0.0395	0	S. cerevisiae ortholog Isd11p has role in iron-sulfur cluster assembly and localizes to mitochondrial matrix, extrinsic to mitochondrial inner membrane
orf19.5823	1.514	0.0419	0.69	4.04e-05	SGT2	Putative small tetratricopeptide repeat (TPR)-containing protein; protein abundance is affected by URA3 expression in the CAI-4 strain background; transcription is regulated by Mig1p
orf19.4531	1.514	0.0398	1.206	0.0339	0	Putative PDR-subfamily ABC transporter
orf19.7196	1.507	0.0091	0.605	7.3e-05	0	Putative vacuolar protease; upregulated in the presence of human neutrophils
orf19.5785	2.867	0.0757	6.346	0.00139	0	Predicted ORF in Assemblies 19, 20 and 21; greater mRNA abundance observed in a cyr1 or ras1 homozygous null mutant than in wild type; induced by nitric oxide
orf19.4477	4.755	0.0921	4.874	1.4e-06	CSH1	Aldo-keto reductase family member, similar to aryl alcohol dehydrogenases; role in fibronectin adhesion, cell surface hydrophobicity; regulated by temperature, growth phase, benomyl, macrophage interaction; azole resistance associated
orf19.7077	2.102	0.137	3.233	0.0227	0	Putative ferric reductase; transcription is activated by Mac1p under copper starvation; Plc1p-regulated; transcription is negatively regulated by Rim101p
orf19.6079	1.968	0.0842	3.222	0.000126	0	Predicted ORF in retrotransposon Tca8 with similarity to the Gag region encoding nucleocapsid-like protein; transcription is downregulated in response to ciclopirox olamine; filament induced; regulated by Rfg1p, Tup1p; overlaps orf19.6078.1
orf19.6073	0.529	0.00235	3.039	3.6e-07	HMX1	Heme oxygenase; acts in utilization of hemin iron; transcriptionally activated by heat, low iron, or hemin; negatively regulated by Efg1p; expression greater in low iron; upregulated by Rim101p at pH 8; Hap43p-induced; biofilm-induced
orf19.6078	1.56	0.346	2.929	2.23e-06	POL93	Predicted ORF in retrotransposon Tca8 with similarity to the Pol region of retrotransposons encoding reverse transcriptase, protease and integrase; downregulated in response to ciclopirox olamine; induced upon biofilm formation
orf19.3612	2.652	0.15	2.816	5.28e-06	PST2	Putative NADH:quinone oxidoreductase; similar to 1,4-benzoquinone reductase; immunogenic in mice; benomyl treatment induces transcription; oxidative stress-induced via Cap1p; fungal-specific (no human/murine homolog), farnesol-downregulated
orf19.5121	1.548	0.304	2.508	0.013	OPT5	Oligopeptide transporter; fungal-specific (no human or murine homolog); induced by BSA, but not by tetrapeptide or pentapeptide
orf19.893	0.486	0.581	2.478	0.0444	PGA17	Putative GPI-anchored protein; exogenously expressed protein is a substrate for Kex2p processing in vitro; transcription is repressed in response to alpha pheromone in SpiderM medium; macrophage-induced gene
orf19.7055	1.126	0.781	2.472	0.0442	0	0
orf19.7130	1.211	0.715	2.472	0.0452	0	Hap43p-repressed gene
orf19.5424	0.95	0.725	2.442	0.0337	0	0
orf19.3997	1.591	0.374	2.315	8.28e-06	ADH1	Alcohol dehydrogenase; oxidizes ethanol into acetaldehyde; at yeast, but not hyphal cell surface; soluble in hyphae; immunogenic in human/mouse; complements S. cerevisiae adh1 adh2 adh3 mutation; biofilm-, fluconazole-, farnesol-induced
orf19.2916	0.526	0.723	2.275	0.00976	0	0
orf19.4145	1.341	0.0753	2.182	2.35e-05	ZCF20	Predicted zinc-finger protein of unknown function; Hap43p-induced gene
orf19.3746	0.492	0.521	2.166	0.0444	IFC1	Oligopeptide transporter; induced upon phagocytosis by macrophage; macrophage/pseudohyphal-repressed after 16h; fluconazole-induced; virulence-group-correlated expression; fungal-specific (no mammalian homolog); Hap43p-repressed
orf19.7111.1	0.877	0.142	2.11	0.0453	SOD3	Cytosolic manganese-containing superoxide dismutase; protection against oxidative stress; downregulated by ciclopirox olamine, induced during stationary phase when SOD1 expression is repressed; Hap43p-repressed; biofilm-induced
orf19.3829	1.426	0.291	2.07	0.00965	PHR1	Glycosidase of cell surface; may act on cell-wall beta-1,3-glucan prior to beta-1,6-glucan linkage; E169 and E270 at active site; role in systemic but not vaginal virulence (neutral, not low pH); high pH or filamentation induced
orf19.6249	2.522	0.0981	1.998	0.000217	HAK1	Putative potassium transporter; similar to Schwanniomyces occidentalis Hak1p; amphotericin B induced; transcriptionally induced upon phagocytosis by macrophage; Hap43p-repressed gene
orf19.896	2.289	0.106	1.963	0.000257	CHK1	Histidine kinase involved in two-component signaling pathway, regulates cell wall biosynthesis; disruption impairs hyphal growth, decreases virulence in mouse intravenous (but not rat vaginal) infection and increases rate of phagocytosis
orf19.5759	2.353	0.0647	1.929	0.000262	SNQ2	Protein similar to S. cerevisiae Snq2p transporter; member of PDR subfamily of ABC family; transposon mutation affects filamentation; benomyl-induced transcription; detected at yeast-form cell plasma membrane by mass spec
orf19.3982	1.371	0.386	1.927	9.61e-06	0	Maltase; induced during growth on sucrose; transcription is induced in response to alpha pheromone in SpiderM medium; biofilm-induced
orf19.1363	1.176	0.397	1.919	4.18e-05	0	Putative protein of unknown function; late-stage biofilm-induced gene; Plc1p-regulated; transcriptionally activated by Mnl1p under weak acid stress
orf19.2553	0.789	0.557	1.913	0.0494	0	Protein similar to S. cerevisiae Pmr1p; amphotericin B induced; previously merged with orf19.2552 in Assembly 20; unmerged from orf19.2552 in a revision of Assembly 21
orf19.7561	0.749	0.0323	1.86	0.000291	DEF1	Regulator of RNA polymerase II; required for filamentous growth and epithelial cell escape, dissemination in RHE model; induced by fluconazole, high cell density; Efg1p/hyphally regulated; role in adhesion and hyphal growth on solid surface
orf19.4530.1	2.27	0.106	1.855	0.000249	0	Biofilm- and planktonic growth-induced gene; regulated by Nrg1p, Tup1p
orf19.1995	1.471	0.19	1.821	0.000786	0	0
orf19.6083	0.817	0.115	1.814	0.000929	0	0
orf19.6995	1.627	0.223	1.748	0.0262	ATO6	Putative fungal-specific transmembrane protein
orf19.4270	0.84	0.344	1.734	0.000172	0	0
orf19.6000	1.808	0.149	1.726	0.000549	CDR1	Multidrug transporter of ATP-binding cassette (ABC) superfamily; transports phospholipids in an in-to-out direction; transcription induced by beta-estradiol, progesterone, corticosteroid, or cholesterol; repressed in young biofilms
orf19.4377	1.4	0.47	1.71	0.00156	KRE1	Predicted GPI-anchor, role in 1,6-beta-D-glucan biosynthesis; production in S. cerevisiae increases glucan content and complements killer toxin sensitivity of kre1 mutant; possible N-linked glycosylation; caspofungin and biofilm induced
orf19.3439	1.284	0.123	1.658	0.00126	0	Predicted ORF in Assemblies 19, 20 and 21; greater mRNA abundance observed in a cyr1 homozygous null mutant than in wild type
orf19.1539	1.257	0.443	1.645	0.0483	0	Predicted ORF in Assemblies 19, 20 and 21; highly induced upon biofilm formation
orf19.2227	1.122	0.524	1.645	0.000387	0	Biofilm-induced gene; repressed by nitric oxide
orf19.6937	1.005	0.94	1.642	0.000459	PTR2	Putative oligopeptide transporter; regulated by Stp2p and Stp3p; transcriptionally induced upon phagocytosis by macrophage; downregulated by Rim101p at pH 8; biofilm-induced
orf19.5635	1.035	0.528	1.641	0.0029	PGA7	Hyphal surface antigen precursor; possible GPI-anchor; induced by ciclopirox olamine, ketoconazole, or by Rim101p at pH 8; regulated during biofilm and planktonic growth; cell wall regeneration-induced; Hap43p-, fluconazole, biofilm-induced
orf19.781	1.741	0.117	1.638	0.0229	0	Major urea transporter; expression is induced by urea; fungal-specific (no human or murine homolog); not required for virulence in a mouse intravenous model
orf19.6322	1.231	0.203	1.63	0.000537	ARD	D-arabitol dehydrogenase, NAD-dependent (ArDH); enzyme of D-arabitol and D-arabinose catabolism; D-arabitol is a marker for active infection in humans; has conserved YXXXK motif of short-chain alcohol-polyol-sugar dehydrogenases
orf19.4749	0.749	0.0469	1.629	0.00272	0	Hap43p-induced gene; hyphal-induced expression, regulated by Cyr1p, Ras1p, Efg1p
orf19.2735	0.788	0.0657	1.619	0.000219	SEN2	Putative tRNA splicing endonuclease subunit; Hap43p-induced; mutation confers hypersensitivity to toxic ergosterol analog, and to amphotericin B; has intron in 5'-UTR
orf19.3229	2.692	0.0863	1.618	0.0189	0	Predicted ORF in Assemblies 19, 20 and 21; transcription detected in high-resolution tiling array experiments
orf19.1114	1.53	0.0644	1.613	0.0157	0	Membrane-localized protein
orf19.986	1.005	0.966	1.607	6.46e-05	GLY1	L-threonine aldolase; possibly tetrameric; complements glycine auxotrophy of S. cerevisiae shm1 shm2 gly1-1 triple mutant; macrophage/pseudohyphal-induced; the GLY1 locus has an RFLP and is triploid in strain SGY269; biofilm-induced
orf19.3337	0.867	0.583	1.591	0.0242	0	Late-stage biofilm-induced gene
orf19.5845	0.934	0.675	1.585	0.000191	RNR3	Putative ribonucleotide reductase large subunit; transcriptionally regulated by iron; expression greater in low iron
orf19.6659	1.523	0.055	1.579	0.000492	GAP6	Broad-specificity amino acid permease; Plc1p-regulated; Gcn4p-regulated; fungal-specific (no human or murine homolog)
orf19.1641	1.108	0.547	1.572	0.0033	0	0
orf19.7255	1.039	0.636	1.572	1.23e-05	RPC10	Putative RNA polymerase subunit ABC10-alpha of RNA polymerase complexes I, II, and III; flucytosine induced
orf19.4907	2.063	0.0972	1.558	0.0035	0	Putative protein of unknown function; Hap43p-repressed gene; increased transcription is observed upon fluphenazine treatment; possibly transcriptionally regulated by Tac1p; induced by nitric oxide; fungal-specific (no human/murine homolog
orf19.5188	1.036	0.543	1.526	0.00129	CHS1	Chitin synthase; essential; required for primary septum synthesis in yeast-form cells and hyphae; one of multiple chitin synthases; enzymatically activated by proteolytic processing; complements defects of S. cerevisiae chs1 or chs2 mutant
orf19.4195.1	0.807	0.229	1.526	0.00279	FCA1	Cytosine deaminase; enzyme of pyrimidine salvage; functional homolog of S. cerevisiae Fcy1p; mutation is associated with resistance to flucytosine (5-FC) in a clinical isolate; hyphal downregulated; gene has intron
orf19.4476	1.935	0.196	1.523	0.0471	0	Predicted ORF in Assemblies 19, 20 and 21; transcript induced by ketoconazole
orf19.6315	1.293	0.147	1.515	0.000554	0	0
orf19.6514	1.053	0.67	1.506	0.000571	CUP9	Genecupregulated in clinical isolates from HIV+ patients with oral candidiasis; transcription reduced upon yeast-hyphal switch; ketoconazole-induced; Plc1p-regulated; shows colony morphology-related Ssn6p regulation; biofilm-induced gene

## Sheet: Down regulated
Genes down regulated in at least one time point
Systematic Name	Ratio 30 min	30 min t-test p-value	Ratio 60 min	60 min t-test p-value	name	description
orf19.1288	0.822	0.388	0.315	0.000318	FOX2	3-hydroxyacyl-CoA epimerase, required for fatty acid beta-oxidation; upregulated upon phagocytosis; transcription regulated by Mig1p, by white-opaque switching and by DNA methylation; transcriptional activation by oleate requires Ctf1p
orf19.6844	2.833	0.031	0.322	0.000155	ICL1	Isocitrate lyase; enzyme of glyoxylate cycle; required for virulence in murine infection; no mammalian homolog; induced upon phagocytosis by macrophage; farnesol regulated; Pex5p-dependent peroxisomal localization; stationary phase enriched
orf19.4591	0.648	0.0756	0.382	0.0025	CAT2	Major carnitine acetyl transferase localized in peroxisomes and mitochondria; involved in intracellular acetyl-CoA transport; farnesol-upregulated in biofilm; induced in macrophages; Hog1p-downregulated; stationary phase enriched protein
orf19.6254	0.62	0.0955	0.39	0.00154	ANT1	S. cerevisiae ortholog Ant1p has adenine nucleotide transmembrane transporter activity, has role in peroxisome organization, fatty acid beta-oxidation, ATP transport and localizes to integral to peroxisomal membrane
orf19.1704	0.893	0.272	0.392	0.00272	FOX3	Putative peroxisomal 3-oxoacyl CoA thiolase; expression is regulated upon white-opaque switching
orf19.1264	0.284	0.0198	0.394	0.00246	CFL2	Iron utilization protein; putative oxidoreductase; regulated by Sfu1p, Nrg1p, Tup1p, Rim101p; alkaline, low iron, fluphenazine, ciclopirox olamine, flucytosine, fluconazole, biofilm induced; caspofungin, amphotericin B repressed
orf19.2397	0.439	0.261	0.423	2.14e-07	0	Predicted membrane transporter, member of the anion:cation symporter (ACS) family, major facilitator superfamily (MFS); amphotericin B, caspofungin repressed; Hap43p-repressed
orf19.7586	0.623	0.199	0.439	3.21e-05	CHT3	Major chitinase; secreted; functional homolog of S. cerevisiae Cts1p; 4 N-glycosylation motifs; possible O-mannosylation; putative signal peptide; hyphal-repressed; farnesol upregulated in biofilm; regulated by Efg1p, Cyr1p, Ras1p
orf19.2158	0.237	0.0135	0.439	0.00241	NAG3	Putative transporter of the major facilitator superfamily (MFS); similar to Nag4p; required for wild-type mouse virulence and cycloheximide resistance; in gene cluster that includes genes encoding enzymes of GlcNAc catabolism
orf19.2475	0.505	0.23	0.443	0.00191	PGA26	GPI-anchored adhesin-like protein of the cell wall, role in cell wall integrity; required for normal virulence; transcriptionally regulated by iron; expression greater in high iron; induced during cell wall regeneration; Hap43p-repressed
orf19.1932	0.228	0.0277	0.445	0.000308	CFL4	Similar to ferric reductase, C-terminal region; expression greater in low iron; transcription is negatively regulated by Sfu1p; ciclopirox olamine induced; shows colony morphology-related gene regulation by Ssn6p; Hap43p-repressed
orf19.272	0.569	0.0761	0.456	0.00157	FAA21	Predicted acyl CoA synthetase; upregulated upon phagocytosis; transcription is regulated by Nrg1p and Mig1p
orf19.473	0.547	0.103	0.458	0.00454	TPO4	Putative sperimidine transporter; fungal-specific (no human or murine homolog)
orf19.4784	1.862	0.000716	0.466	0.0419	CRP1	Plasma membrane copper transporter; CPx P1-type ATPase; mediates Cu resistance; similar to proteins of Menkes and Wilson disease; copper-induced; Tbf1p-activated; suppresses Cu sensitivity of S. cerevisiae cup1 mutant; biofilm-induced
orf19.4980	3.087	0.00145	0.467	0.000183	HSP70	Putative hsp70 chaperone; role in entry into host cells; heat-shock, amphotericin B, cadmium, ketoconazole-induced; farnesol-downregulated in biofilm; surface localized in yeast-form and hyphal cells; antigenic in host
orf19.5805	0.817	0.0532	0.487	0.000384	DLD1	Putative D-lactate dehydrogenase; transcription is specific to white cell type; shows colony morphology-related gene regulation by Ssn6p; transcription is upregulated in both intermediate and mature biofilms; Hap43p-repressed gene
orf19.6838	0.801	0.38	0.489	0.000253	0	Putative protein of unknown function, transcription is upregulated in clinical isolates from HIV+ patients with oral candidiasis
orf19.5806	0.47	0.00291	0.498	6.57e-05	ALD5	NAD-aldehyde dehydrogenase; decreased expression in fluconazole-resistant isolate, or in hyphae; biofilm induced; fluconazole-downregulated; protein abundance is affected by URA3 expression in the CAI-4 strain; stationary phase enriched
orf19.2593	1.008	0.946	0.512	9.92e-06	BIO2	Putative biotin synthase; transcriptionally upregulated in high iron; transcription downregulated by treatment with ciclopirox olamine; upregulated in clinical isolates from HIV+ patients with oral candidiasis; Hap43p-repressed
CaalfMp12	0.836	0.366	0.518	0.000226	NAD4L	Subunit 4L of NADH:ubiquinone oxidoreductase (NADH:ubiquinone dehydrogenase), a multisubunit enzyme complex (complex I) of the mitochondrial inner membrane that catalyzes the first step in mitochondrial respiration
orf19.1691	0.822	0.434	0.531	0.0413	0	Plasma-membrane-localized protein; filament induced; Hog1p-, ketoconazole-, fluconazole- and hypoxia-induced; regulated by Nrg1p, Tup1p, Upc2p; increased expression in response to prostaglandins; biofilm- and planktonic growth-induced
orf19.742	0.814	0.153	0.533	0.0019	ALD6	Putative aldehyde dehydrogenase; stationary phase enriched protein; expression regulated upon white-opaque switch; transcription is upregulated in both intermediate and mature biofilms
orf19.3931	1.488	0.0181	0.536	0.000392	SFC1	Putative succinate-fumarate transporter; gene is alkaline upregulated; transcription is upregulated in both intermediate and mature biofilms
orf19.4910	0.625	0.0543	0.54	0.00087	FGR41	Putative GPI-anchored protein; adhesin-like protein; transposon mutation affects filamentous growth
orf19.5437	0.74	0.0204	0.542	1.12e-07	RHR2	Glycerol 3-phosphatase; roles in osmotic tolerance, glycerol accumulation in response to salt; required for biofilm formation; biofilm-induced; regulated by macrophage, stress response, yeast-hyphal switch, pheromone, GCN4, HOG1, NRG1, TUP1
orf19.7654	1.715	0.00177	0.542	3.25e-06	CPR6	Putative peptidyl-prolyl cis-trans isomerase; macrophage/pseudohyphal-repressed; heavy metal (cadmium) stress-induced; heterozygous null mutant displays sensitivity to virgineone
orf19.4082	1.566	0.242	0.543	0.000306	DDR48	Immunogenic stress-associated protein; regulated by filamentous growth pathways; induced by benomyl, caspofungin, ketoconazole or in azole-resistant strain; Hog1p, farnesol, alkaline downregulated; stationary phase enriched; biofilm-induced
orf19.4041	0.79	0.376	0.548	0.00264	PEX4	Putative peroxisomal ubiquitin conjugating enzyme; Hap43p-repressed gene; transcription is upregulated in both intermediate and mature biofilms
orf19.7503	0.47	0.00319	0.551	0.00397	CDA2	Putative chitin deacetylase; transcription is positively regulated by Tbf1p
orf19.7504	0.49	0.0153	0.551	3.71e-05	0	Predicted ORF in Assemblies 19, 20 and 21; Plc1p-regulated; induced in core caspofungin response
orf19.4996	0.745	0.42	0.551	0.00994	0	0
orf19.4342	0.684	0.00576	0.556	0.00249	0	Biofilm-induced gene
orf19.2032	1.169	0.599	0.558	0.0222	0	0
orf19.6830	1.061	0.624	0.559	0.00518	0	Putative enoyl-CoA hydratase
orf19.3895	0.787	0.297	0.56	1.72e-05	CHT2	GPI-linked chitinase required for normal filamentous growth; downregulated in core caspofungin response; induced in yeast cells; fluconazole, Cyr1p-, Efg1p-, pH-regulated; mRNA binds She3p, is localized to yeast-form buds and hyphal tips
orf19.4737	0.967	0.884	0.56	0.00984	TPO3	Possible role in polyamine transport; MFS-MDR family; transcription induced by Sfu1p, regulated upon white-opaque switching; decreased expression in hyphae compared to yeast-form cells; regulated by Nrg1p; fungal-specific
orf19.2124	0.994	0.945	0.572	0.000339	0	0
orf19.5295	1.691	0.0308	0.572	0.000674	0	Predicted ORF in Assemblies 19, 20 and 21; transcription is induced in response to alpha pheromone in SpiderM medium
orf19.3461	0.474	0.119	0.574	1.03e-06	0	Predicted ORF in Assemblies 19, 20 and 21; oxidative stress-induced via Cap1p; transcription is induced in response to alpha pheromone in SpiderM medium
orf19.2062	0.652	0.104	0.578	0.0439	SOD4	Copper- and zinc-containing superoxide dismutase; role in response to host innate immune ROS; regulated on white-opaque switching; ciclopirox olamine induced; caspofungin repressed; family includes SOD1, SOD4, SOD5, SOD6; yeast-associated
orf19.6773	1.183	0.301	0.579	0.00153	ECM29	Protein similar to S. cerevisiae Ecm29p; transposon mutation affects filamentous growth
orf19.6398	1.477	0.367	0.581	0.0297	0	Predicted ORF in Assemblies 19, 20 and 21; induced by nitric oxide
orf19.5640	1.001	0.994	0.595	0.000215	PEX5	Pex5p family protein; required for PTS1-mediated peroxisomal protein import, fatty acid beta-oxidation; similar to S. cerevisiae Pas10p peroxisomal targeting receptor; macrophage/pseudohyphal-repressed; Hap43p-repressed
orf19.6874	0.629	0.0102	0.595	0.00198	0	Putative helix-loop-helix (HLH) transcription factor with a role in filamentous growth
orf19.2013	0.996	0.961	0.598	3.38e-06	KAR2	Similar to chaperones of Hsp70p family; role in translocation of proteins into the ER; transcriptionally regulated by iron; expression greater in high iron; protein present in exponential and stationary growth phase yeast cultures
orf19.1608	1.183	0.475	0.599	0.000503	0	0
orf19.7350	1.129	0.288	0.6	0.000386	RCT1	Protein present in exponential and stationary growth phase yeast culture; fluconazole-induced; elevated mRNA levels in a cyr1 or ras1 null mutant and decreased mRNA abundance in efg1 null mutant; regulated by Nrg1p, Tup1p, Tbf1p, Ssn6p
orf19.2244	2.616	0.000317	0.603	0.00051	0	Similar to oxidoreductases and to S. cerevisiae Yjr096wp; transcription is negatively regulated by Sfu1p; increased transcription upon benomyl treatment; decreased expression in an ssr1 null mutant; Hap43p-repressed gene
orf19.1631	0.69	0.0145	0.605	5.41e-05	ERG6	Delta(24)-sterol C-methyltransferase, converts zymosterol to fecosterol in ergosterol biosynthesis by methylating C-24; mutation confers nystatin resistance; Hap43p-, fluconazole-induced; transcription increased in azole-resistant strain
orf19.7196	1.507	0.0091	0.605	7.3e-05	0	Putative vacuolar protease; upregulated in the presence of human neutrophils
orf19.2758	0.618	0.0983	0.611	0.000786	PGA38	Putative GPI-anchored protein; adhesin-like protein; repressed during cell wall regeneration; possibly an essential gene, disruptants not obtained by UAU1 method
orf19.3573	1.002	0.98	0.611	0.00136	PEX6	S. cerevisiae ortholog Pex6p has protein heterodimerization activity, ATPase activity and has role in replicative cell aging, protein import into peroxisome matrix, receptor recycling
orf19.5015	0.925	0.483	0.614	0.00191	MYO2	Class V myosin; nonessential; sole class V myosin in C. albicans; required for wild-type actin cytoskeletal polarity, nuclear organization and migration, and hyphal growth; conserved myosin ATPase and tail domains; Hap43p-induced gene
orf19.1344	0.554	0.0184	0.618	0.000176	0	Predicted ORF in Assemblies 19, 20 and 21; fluconazole-induced
orf19.1065	1.706	0.0192	0.623	2.69e-05	SSA2	HSP70 family chaperone; found in cell wall fractions; antigenic; role in import of beta-defensin peptides; ATPase domain binds histatin 5; at surface of hyphae, not yeast-form cells; farnesol-downregulated in biofilm; caspofungin repressed
orf19.3629	0.864	0.452	0.625	0.00132	DSE1	Essential cell wall protein involved in cell wall integrity and rigidity; periodic mRNA expression peaks at M/G1 phase; Ace2p-induced; required for virulence in a mouse model of infection
orf19.2107.1	1.582	0.0264	0.627	0.0113	STF2	Protein involved in ATP biosynthesis; decreased expression in hyphae vs yeast-form cells; downregulated by Efg1p, Hap43p; transcription upregulated in clinical isolates from HIV+ patients with oral candidiasis; biofilm-induced
orf19.1930	0.537	0.148	0.628	0.00727	CFL5	Protein similar to ferric reductase Fre10p; expression greater in low iron; negatively regulated by Sfu1p; ciclopirox olamine, flucytosine induced; amphotericin B repressed; transcription is positively regulated by Tbf1p, Hap43p
orf19.5565	1.332	0.369	0.631	0.00905	0	Putative 3-hydroxyisobutyrate dehydrogenase
orf19.2431	0.979	0.859	0.633	0.00247	0	Dubious open reading frame, not conserved in Candida species; transcription is induced in response to alpha pheromone in SpiderM medium; mRNA binds She3p
orf19.3323	1.119	0.516	0.633	0.0032	0	0
orf19.3906	1.747	0.335	0.635	0.0335	0	Protein not essential for viability
orf19.5749	1.468	0.00104	0.636	0.00255	SBA1	Similar to co-chaperones; transcriptionally regulated by iron; expression greater in high iron; farnesol-, heavy metal (cadmium) stress-induced; protein level decreases in stationary phase cultures; Hap43p-repressed gene
orf19.2599	0.853	0.248	0.638	0.000439	CRC1	Mitochondrial carnitine carrier protein
orf19.4833	1.64	0.0778	0.638	0.00613	MLS1	Malate synthase; glyoxylate cycle enzyme; no mammalian homolog; transcription induced upon phagocytosis by macrophage; regulated upon white-opaque switching; biofilm-repressed; strong oxidative stress induced; stationary phase enriched
orf19.220	0.728	0.0335	0.64	0.000506	PIR1	1,3-beta-glucan-linked structural cell wall protein; N-mannosylated, O-glycosylated by Pmt1p; tandem repeats; cell wall defect in heterozygous mutant; hyphal repressed; Hog1p, fluconazole, hypoxia induced; iron, Efg1p, Plc1p, temp regulated
orf19.6515	1.558	0.00648	0.64	0.000946	HSP90	Essential chaperone of Hsp90 family, activated by heat shock, stress; regulates several signal transduction pathways; localizes to surface of hyphae, not yeast cells; mediates echinocandin resistance
CaalfMp13	0.787	0.0849	0.641	0.000554	NAD5	Subunit 5 of NADH:ubiquinone oxidoreductase (NADH:ubiquinone dehydrogenase), a multisubunit enzyme complex (complex I) of the mitochondrial inner membrane that catalyzes the first step in mitochondrial respiration
orf19.1857	0.663	0.152	0.642	0.00132	0	Protein not essential for viability
orf19.3066	0.599	0.0552	0.643	0.00354	ENG1	Endo-1,3-beta-glucanase required for cell separation after division, orthologous to S. cerevisiae Dse4p; caspofungin-, fluconazole-repressed; fungal-specific; repressed in response to alpha pheromone in SpiderM medium; biofilm-induced gene
orf19.3893	0.74	0.104	0.649	0.00564	SCW11	Cell wall protein; transcription decreased in mutant lacking ACE2; downregulated in core caspofungin response; expression greater in high iron; possibly an essential gene, disruptants not obtained by UAU1 method; planktonic growth-induced
orf19.707	1.177	0.16	0.65	0.00348	APG7	S. cerevisiae ortholog Atg7p has role in CVT pathway, C-terminal protein lipidation, protein modification by small protein conjugation, mitochondrion degradation, piecemeal microautophagy of nucleus, macroautophagy
orf19.5677	1.404	0.131	0.65	0.0213	DUR4	Putative urea permease; fungal-specific (no human or murine homolog); possibly an essential gene, disruptants not obtained by UAU1 method
orf19.633	0.822	0.375	0.651	0.00223	0	Putative methyltransferase; decreased expression in hyphae compared to yeast-form cells; expression regulated during planktonic growth; late-stage biofilm-induced gene; Hap43p-repressed gene
orf19.7602	1.466	0.0422	0.652	0.000304	0	Putative Hsp90p co-chaperone; Hap43p-repressed gene; heavy metal (cadmium) stress-induced; oxidative stress-induced via Cap1p
orf19.6973	1.015	0.89	0.653	0.00122	0	Hap43p-repressed gene; regulated by Gcn2p and Gcn4p
orf19.5514	0.948	0.68	0.654	0.000542	0	Predicted ORF in Assemblies 19, 20 and 21; expression upregulated during growth in the mouse cecum
orf19.2340	1.375	0.0661	0.66	0.00138	CDC48	Putative microsomal ATPase; plasma membrane-localized; regulated by Gcn2p and Gcn4p; induced by amino acid starvation (3-AT treatment); macrophage/pseudohyphal-repressed; protein levels decrease in stationary phase yeast cultures
orf19.5984	1.106	0.386	0.661	0.000362	0	Putative protein of unknown function; homozygous transposon insertion causes decreased colony wrinkling under filamentous growth-inducing conditions, but does not block true hyphal formation in liquid media
orf19.4732	0.927	0.32	0.662	0.000358	SEC24	Protein with a possible role in ER to Golgi transport; induced upon yeast-hyphal switch; sumoylation target
orf19.4246	1.145	0.0946	0.663	0.000225	0	Protein with similarity to S. cerevisiae Ykr070wp; transposon mutation affects filamentous growth; Hog1p-downregulated; shows colony morphology-related gene regulation by Ssn6p; induced during cell wall regeneration; possibly essential gene
orf19.7437	1.647	0.0535	0.664	0.000367	0	Putative protein of unknown function; Hap43p-repressed gene; ortholog of S. cerevisiae YJL218W
orf19.3180	1.036	0.691	0.665	0.00774	0	S. cerevisiae ortholog Inp54p has phosphatidylinositol-4,5-bisphosphate 5-phosphatase activity, has role in phosphatidylinositol dephosphorylation and localizes to endoplasmic reticulum
orf19.1628	1.354	0.103	0.665	0.00499	LAP41	Putative aminopeptidase yscI precursor; not essential for viability; protein present in exponential and stationary growth phase yeast cultures
orf19.171	0.572	0.00456	1.134	0.137	DBP2	Putative DEAD-box family ATP-dependent RNA helicase; flucytosine induced; downregulated in core stress response
orf19.1860	0.644	0.0152	0.897	0.279	LSC2	Putative succinate-CoA ligase beta subunit; transcription regulated by Mig1p and Tup1p; transcriptionally regulated by iron; expression greater in high iron; filament; protein present in exponential and stationary growth phase yeast cells
orf19.6317	0.607	0.026	1.187	0.045	ADE6	5-Phosphoribosylformyl glycinamidine synthetase, enzyme of adenine biosynthesis; not induced in GCN response, in contrast to the S. cerevisiae ortholog; protein only detected in stationary phase yeast-form cultures
orf19.7466	0.57	0.0254	0.789	0.00659	ACC1	Putative acetyl-coenzyme-A carboxylases; regulated by Efg1p; amphotericin B repressed; caspofungin repressed; intron in 5'-UTR; gene used for strain identification by multilocus sequence typing; Hap43p-induced gene
orf19.5550	0.654	0.0227	1.284	0.00752	MRT4	Putative mRNA turnover protein; Hap43p-induced gene; mutation confers hypersensitivity to tubercidin (7-deazaadenosine); transcription is upregulated in both intermediate and mature biofilms
orf19.5557	0.549	0.0444	0.333	0.419	MNN4-4	Mannosyltransferase; transcription is upregulated in a mutant lacking the Ssk1p response regulator proteinor in a nik1 homozygous null mutant, but not in chk1 or sln1 null mutants; pheromone induced; planktonic growth-induced
orf19.5722	0.661	0.0376	0.941	0.538	0	0
orf19.5753	0.618	0.00777	0.722	0.0174	HGT10	Glycerol permease involved in glycerol uptake; member of the major facilitator superfamily; induced by osmotic stress, at low glucose in rich media, during cell wall regeneration; 12 membrane spans; Hap43p-induced gene
orf19.4143	0.642	0.021	1.353	0.000783	0	S. cerevisiae ortholog Fyv7p has role in maturation of SSU-rRNA from tricistronic rRNA transcript (SSU-rRNA, 5.8S rRNA, LSU-rRNA) and localizes to nucleolus
orf19.4279	0.599	0.00374	0.978	0.915	MNN1	Putative alpha-1,3-mannosyltransferase, a component of mannosyltransferase complex; transcription negatively regulated by Rim101p; transcription elevated in chk1 and nik1 null mutants, but not in sln1 null mutant; biofilm-induced gene
orf19.979	0.647	0.027	0.802	0.00858	FAS1	Beta subunit of fatty-acid synthase; multifunctional enzyme; fluconazole-induced; Hap43p-induced; amphotericin B, caspofungin repressed; macrophage/pseudohyphal-induced; fungal-specific (no human or murine homolog)
orf19.1263	0.572	0.0083	0.934	0.274	CFL1	Protein similar to ferric reductase Fre10p; possible functional homolog of S. cerevisiae Fre1p (reports differ); transcription is negatively regulated by Sfu1p, copper, amphotericin B, caspofungin; induced by ciclopirox olamine
orf19.1306	0.637	0.046	1.099	0.00619	0	0
orf19.4657	0.565	0.0176	0.702	0.000345	0	S. cerevisiae ortholog Nem1p has phosphoprotein phosphatase activity and has role in ascospore formation, regulation of lipid biosynthetic process, nuclear envelope organization
orf19.5949	0.584	0.00339	0.772	0.00942	FAS2	Alpha subunit of fatty-acid synthase; required for virulence in mouse systemic infection and rat oropharyngeal infection models; regulated by Efg1p; fluconazole-induced; amphotericin B repressed
orf19.6922	0.617	0.0168	1.145	0.525	0	0
orf19.6983	0.618	0.0031	0.742	0.0214	0	Hap43p-repressed gene; repressed by nitric oxide
orf19.7442	0.655	0.0319	0.946	0.614	0	0
orf19.1224	0.646	0.0126	0.949	0.47	FRP3	Putative ammonium transporter; upregulated in the presence of human neutrophils; fluconazole-downregulated; repressed by nitric oxide
orf19.1442	0.405	0.0128	0.81	0.0313	PLB4.5	Putative phospholipase B; Hog1p-induced; regulated by Ssn6p; putative GPI-anchor; repressed during cell wall regeneration; clade-associated gene expression; Hap43p-induced gene
orf19.1890	0.627	0.0052	0.788	0.0628	0	S. cerevisiae ortholog Ymr210wp has role in medium-chain fatty acid biosynthetic process
orf19.2059	0.558	0.00241	1.284	0.00594	0	0
orf19.2251	0.645	0.00213	1.39	0.00336	AAH1	Protein not essential for viability; similar to S. cerevisiae Aah1p, which is an adenine deaminase involved in purine salvage and nitrogen catabolism; shows colony morphology-related gene regulation by Ssn6p; Hog1p-, biofilm-, CO2-induced
orf19.3040	0.436	0.0427	0.75	0.0042	EHT1	Protein similar to S. cerevisiae Eht1p; transcription is induced in response to alpha pheromone in SpiderM medium
orf19.3338	0.614	0.0436	0.934	0.518	0	0
orf19.3358	0.629	0.00417	0.867	0.0261	LSC1	Putative succinate-CoA ligase subunit; transcriptionally regulated by iron; expression greater in high iron; fluconazole-induced; f protein present in exponential and stationary growth phase yeast cultures
orf19.3684	0.582	0.0273	0.668	0.153	0	S. cerevisiae ortholog Sps19p has 2,4-dienoyl-CoA reductase (NADPH) activity, has role in ascospore formation, fatty acid catabolic process and localizes to peroxisomal matrix
orf19.4814	0.625	0.0255	1.171	0.041	0	0
orf19.5061	0.62	0.0408	1.075	0.354	ADE5,7	Phosphoribosylamine-glycine ligase and phosphoribosylformylglycinamidine cyclo-ligase; interacts with Vps34p; required for hyphal growth and virulence; flucytosine induced; not induced in GCN response, in contrast to S. cerevisiae ortholog
orf19.5063	0.627	0.0178	0.942	0.58	COI1	Secreted protein; ciclopirox olamine induced; regulated by Ssn6p; induced by nitric oxide independent of Yhb1p; Hap43p-induced
orf19.5066	0.61	0.0414	1.357	0.00108	0	Putative pre-60S pre-ribosomal particle subunit; essential gene; S. cerevisiae ortholog RRP17 is essential; Hap43p-induced
orf19.6073	0.529	0.00235	3.039	3.6e-07	HMX1	Heme oxygenase; acts in utilization of hemin iron; transcriptionally activated by heat, low iron, or hemin; negatively regulated by Efg1p; expression greater in low iron; upregulated by Rim101p at pH 8; Hap43p-induced; biofilm-induced
